# Supplementary material for: Transcriptomic Analysis of Glycosylation and Neuroregulatory Pathways in Rodent Models in Response to Psychedelic Molecules
Source: Int J Mol Sci. 2023 Jan 7;24(2):1200. doi: 10.3390/ijms24021200 (PMC9867456; doi:10.3390/ijms24021200)
Supplement: Supplementary file 1 [file ijms-24-01200-s001.zip › Psychedelic-GeneExpressionAnalysis_SupplementaryTables.xlsx]

## Sheet: KeyWords
Supplementary Table S1: List of names of the psychedelic molecules used for identifying relevant gene expression studies from public databases for the current research study
Psychedelic Gene Expression Studies for analysis
	Compounds selected	Data availability			Database		Summary of transcriptomics datasets analyzed from GEO database		No: of datasets	Rodent		Human	Wild Boar
		Human	Rodent	Other mammalian species						Brain	Heart	Brain	Brain
Classic Psychedelic	Mescaline						Classic Psychedelic	Psilocybin	1	û		û	ü
	Psilocin							LSD	1	ü		û	û
	Psilocybin			ü	GEO		Enactogens	MDMA	1	û	ü	û	û
	DMT (Dimethyltryptamine)							DOI	1	ü		û	û
	Peyote						Dissociatives	Ketamine	4	ü		û	û
	Ayahuasca
	LSD		ü		Relevant data extracted and gene name mapping performed from the Raw file shared by Charles D Nichols https://www.nature.com/articles/1395848
Enactogens	Methamphetamine	ü	ü		GEO, Array Express
	3,4-methylenedioxymethamphetamine (MDMA)	(non-coding RNA)	ü		GEO, Array Express
	±)2,5-dimethoxy 4-iodoamphetamine (DOI)		ü		GEO
Dissociatives	Ketamine	(cell line)	ü	ü	GEO, Array Express
	Ibogaine
Comparative natural molecules	Dopamine	ü	ü		GEO, Array Express
	Serotonin	ü	ü		GEO, Array Express
Final list of datapoints selected for detailed gene enrichment and functional annotation analysis
GEO ID	Ttile	Species	Treatment	Dose	Tissue
GSE138	Effect of serotonergic hallucinogen in mouse somatosensory cortex	Mus musculus	(±)2,5-dimethoxy 4-iodoamphetamine (DOI)	2 mg/kg or 10 mg/kg i.p	somatosensory cortex samples
GSE93041	Gene expression in the anterior cingulate cortex in mice treated with ketamine (3mg/kg) or sleep deprivation (SD) during 12 hrs., and saline as the control group.	Mus musculus	ketamine	3mg/kg i.p	anterior cingulate cortex
GSE138802	Mesocorticolimbic circuit mechanisms underlying the effects of ketamine on dopamine: a translational imaging study	Mus musculus	ketamine	30 mg/kg i.p	pre-limbic cortex
GSE73798	Molecular profile of ketamine in comparison to memantine and phencyclidyne and other psychotropic drugs [mouse hippocampus]	Mus musculus	ketamine and Phencyclidine	20 mg/kg i.p; 5 mg/kg	Hippocampus Tissue in 4 time points (1, 2, 4 and 8h after drug administration)
GSE73799	Molecular profile of ketamine in comparison to memantine and phencyclidyne and other psychotropic drugs [mouse hippocampus]	Mus musculus	ketamine and Phencyclidine	20 mg/kg i.p; 5 mg/kg	Striatal Tissue in 4 time points (1, 2, 4 and 8h after drug administration)
GSE68175	ECSTASY (MDMA) ALTERS CARDIAC GENE EXPRESSION AND DNA METHYLATION: IMPLICATIONS FOR CIRCADIAN RHYTHM DYSFUNCTION IN THE HEART (expression)	Mus musculus	MDMA	40 mg/kg i.p	Heart tissue
GSE130254	Regional Analysis of The Brain Transcriptome In Mice Bred For High And Low Methamphetamine Consumption	Mus musculus	Methamphetamine	20 mg/L for the first 4 days, and was increased to 40 mg/L for the next 4 days. Oral	nucleus accumbens (NAc), prefrontal cortex (PFC), and ventral midbrain (VMB).
GSE74737	Gene Networks and Blood Biomarkers of Methamphetamine-Associated Psychosis: A Preliminary Integrative RNA-Sequencing Report	Homo sapiens	Methamphetamine	subjects diagnosed with METH-associated psychosis	Blood samples
GSE172074	Effects of a single dose of psilocybin on behaviour, brain 5-HT2A receptor occupancy and gene expression in the pig	Sus scrofa	Psilocybin	0.08mg/kg i.v	prefrontal cortex
Raw file kindly provided by Dr. Charles D Nichols	A Single Dose of Lysergic Acid Diethylamide Influences Gene Expression Patterns within the Mammalian Brain	Male Sprague-Dawley rats	(+)-LSD tartrate	1.0 mg/kg i.p.,	prefrontal cortex, hippocampus and midbrain

## Sheet: Psychedelic-Mouse-GlycoGenes
Supplementary Table S2: Glycogene DEGs in response to the treatment with psychedelic molecules (classic and psychedelic-like).
The gene list is manually compiled to create a prior-knowledge gene subset for extracting the fold change values. Only those datasets that have atleast one significant DEGs belonging to the glycogene subset has been displayed in the matrix based on the filter criteria mentioned below
Filter Criteria
p-value <= 0.05; Fold change >=0.5 and <=-0.5
Note: Due to limited number of significant DEGs, filter criteria was relaxed to include genes based on p-value only and not the FDR value
	GSE138802	GSE73798	GSE73798	GSE73798	GSE73798	GSE73799	GSE73799	GSE73799	GSE73799	GSE73798	GSE73798	GSE73798	GSE73798	GSE73799	GSE73799	GSE73799	GSE73799
	Ketamine Vs Saline	Ket1hr-Sal1hr	Ket2hr-Sal2hr	Ket4hr-Sal4hr	Ket8hr-Sa84hr	Ket1hr-Sal1hr	Ket2hr-Sal2hr	Ket4hr-Sal4hr	Ket8hr-Sa84hr	Phe1hr-Sal1hr	Phe2hr-Sal2hr	Phe4hr-Sal4hr	Phe8hr-Sal8hr	Phe1hr-Sal1hr	Phe2hr-Sal2hr	Phe4hr-Sal4hr	Phe8hr-Sal8hr
Mouse Glycogenes	Pre-limbic cortex	Hippocampus	Hippocampus	Hippocampus	Hippocampus	Striatum	Striatum	Striatum	Striatum	Hippocampus	Hippocampus	Hippocampus	Hippocampus	Striatum	Striatum	Striatum	Striatum
Cd72	0	0	0	0	0	0	0	0	0	0	0	0	0	-0.404368	0	0	0
Gpc2	0	0	0	0	0	0	0	0	0	0	0	0	0	0	0	0	0
Pkd1l3	0	0	0	0	0	0	0	-0.969105	0.372307	0	0	0	0	0	0	-1.07351	0
St3gal2	0	-0.298691	0	0	0	0	0	0	0	0	0	0	0	0	0	0	0
St6gal2	0	0	0	0	0	0	0	0	0	0	0	0	0	0	0	0	0
Ugt1a2	0	0	0	0	0	-0.333694	0	-0.793139	0	0	0	0	0	0.613541	0	-0.708754	0
Galt	-0.445799	0	0	0	0	0	0	0	0	0	0	0	0	0	0	0	-0.403854
B4galnt1	0	0	0	0	0	0	0	0	0	0	0	0	0	0	0	0	0
Galnt14	0	0	0.323347	0	0	0	0	0	0	0	0	0	0	0	0	0	0
Ndst3	0	0	0	0	0	0	0	0	0	0	0	0	0	0	0	0	0
Naglu	0	0	0	0	0	0	0	0.467854	0	0	0	0	0.334567	0	0	0.429269	0
Extl1	-0.55347	0	0	0	0	0	0	0	0	0	0	0	0	0	0	0	0
Amdhd2	0	0	0	0	0	0	0	0	0	0	0	0	0	0	0	0	0
Xylt2	0	0	0	0	0	0	0	0	0	0	0	0	0	0	0	0	0
Gba	-0.359883	0	0	-0.333453	0	0	0	0	0	0	0	0	0	0	0	0	0
Pmm1	0	0	0	0	0	0	0	0	0	0	0	0	0	0	0	0	0
Siglec1	0	0	0	-0.323633	0	0	0	-0.368557	0	0	0	0	0	0	0	0	0
Xylt1	0	-0.255595	0	0	0	0	0	-0.340397	0	0	0	0	0	0	0	-0.434535	0
Pigt	0	0	0	0	0	0.847031	0	-0.31433	0	0	0	0	0	0	0	0	0
Sftpa1	0	0	0	0	0	0	0	0	0	0	0	0	0	0	0	0	0
Cspg4	0	0	0	0	0	0	0	0	0	0	0	0	0	0	0	0	0
Prg3	0	0	0	0	0	0	0	0	0	0	0	0	0	0	0	0	0
Fut7	0	0	0	0	0	0	0	0	0	0	0	0	0	0	0	0	0
Naga	0	0	0	0	0	0	0	0	0	0	0	0	0	0	0	0	0
Ndst4	3.32348	0	0	-0.325718	0	0	0	0	0	0	0	0	0	0	0	0	0
Chsy3	0	0	0	0	0	0	0	0	0	0	0	0	0	0	0	0	0
Rfng	0	0	0	0	0	0.446248	0	0	0	0	0	0	0	0	0	0	0
Reg3g	0	0	0	0	0	0	0	0	0	0	0	0	0	0	0	0	0
Tkt	0	0.322811	0	0	0	0	0	0	-0.329786	0	0	0	0	0	0	0	-0.345313
Mpdu1	0	0	0	0	0	0	0	0	0	0	0	0	0	-0.417513	0	0	0
Glt6d1	0	0	0	0	0	0	0	0	0	0	0	0	0	0	0	0	0
Galnt3	-1.0606	0	0	0	0	0	0.452349	0	0	0	0	0	0	0	0	0	0
Man2b2	0	0	0	0	0	0	0	0	0	0	0	0	0	0	0	0	0
Chst5	0	0	0	-0.275898	0	0	0	-0.522902	0	0	0	0	0	-0.318892	0	-0.586087	0
Glb1	0	0	0	0	0	-0.441509	0	0	0	0	0	0	0	0	0	-0.374281	0
Hk1	0	0	0	0	0	0	0	-0.505089	0	0	0	0	0	0	0	-0.484137	0
Slc35b4	0	0	0	0	0	0	0	0	0	0	0	0	0	0	0	0	-0.773001
Extl2	0	0	0	0	0	0	0	0	0	0	0	0	0	0	0	0	-0.750337
Ext2	0	0	-0.24652	0	0	-0.414488	0	0	0	0	0	0	0	0	0	0.588892	0
Ugt8a	0	0	0	0	0	0	0	0	0	0.258577	0	0	0	0	0	0	-0.757392
Bgn	0.840141	0	0	0	0	0	0	0	-0.655606	0	0	0	0	0	0	0	-0.730253
Hspg2	0	0	0	0	0	0	0	0	0	-0.432548	0	0	0	0.349814	0	0	-0.350075
Extl3	0	0	0	0	0	0	0	0	0	0	0	0	0	0	0	0	0
Pigo	0	0	0	0	0	0	0	0	0	0	0	0	0	0	0	0	0
Tpst2	0	0	0	0	0	0	0	0	-0.772972	0	0	0	0	0	0.727925	0	-0.926654
Anxa6	0	0	0	0	0	0	0	-0.450491	0	0	0	0	0	0	0	-0.417911	0
Man1a	0	0	0	0	0	-0.448564	0	0	-0.366513	0	-0.295682	0	0	0	0	0	0
Clec1b	0	0	0	0	0	0	0	0	0	0	0	0	0	0	0	0	0
Fam20b	0	0	0	0	0	0	0	0	0	0	0	0	0	0	0.40401	0	0
Ugt1a6a	0	-0.306843	0	0	0	0	0	0.550422	0.483856	0	0	0	0.25567	0	0	0	0
Gpc6	0	0	0	0.341164	0	0	0	0	0	0	0	0	0	0	0	0	0
Edem3	0	0	0	0	0	0	0	0	0	0	0	0	0	0	0	0	0
Agl	0	0	0	0	0	0	0	-0.394027	0	0	0	0	0	0	0	0	-0.650785
Xylb	0	0	0	0	0	0	0	0	0	0	0	0	0	0	0	0	0
Slc35b2	0	0	0	0	0	0	0	0.62786	0	0	0	0	0	0	0	0.713604	0
Gnptg	0	0	0	0	0	0	0	0	0	0	0	0	0	0	0	0	0
Ugt3a1	0	0	0	0	0	-0.537959	0	0	0	0	0.308784	-0.300535	0	-0.524133	0	0	0
Arsb	0	0	0	0	0	0	0	0	0	0	0	0	0	0	0	0	-0.763572
Clec9a	0	0	0	0	0	0	0	0	0	0	0	0	0	0	0	-0.31698	0
Dpm3	0	0	0	0	0	0	0	0	0	0	0	0	0	0	0	0	0
Cryl1	0	0	0	0	0	0	0	0	0	0	0	0	0	0	0	0	0
Ogt	0	0	0	0	0	0	0	0	0	0	0	0	0	0	0	0	-0.753835
Pkd1l2	-1.44224	0	0	0	0	0	0	0	0.529855	0	0	0	0	0	0	0	0
Galnt10	0.618813	0	0.332268	0	0	0	0	0	0	0	0	0	0	0	0	0	0
Dcxr	0	0	0	0	0	0	0	0	0.285365	0	0	0	0	0	0	0	0
Pigk	0	0	0	0	0	0	0	0	0	0	0	0	0	0	0	0	0
Dpagt1	0	0	0	0	0	0	0	0	0	0	0	0	0	0	0	0	0
B4galt3	0	0	0	0	0	0	0	0	0	0	0	0	0	0	0	0	0
Lgals1	0	0	0	0	0	0	0	0	0	0	0	0	0	0	0	0	0
Sftpd	0	0	0	0	0	0	0	0	0	0	0	0	0	0	0	0	0
Chad	0	0	0	0	0	0	0	0	0	0	0	0	0	0	0	0	0
Epyc	0	0	0	0	0	0	-0.50986	0	0	0	0	0	0	0	-0.589717	0	0
Cd207	0	0	0	0	0	-0.381959	0	0	0	0	0	0	0	0	0	0	0
Lgals12	0	0	0	0	0	0	0	0	0.332811	0	0	0	0	0	0	0	0.420189
Lgals3	0	0	0	0	0	0	0	0	0	-0.520762	0	0	0	0	0	0	0
Selp	0	0	0	0	0	0	0	0	0	0	0	0	0	0	0	0	0
Clec2l	0	0	0	0	0	0	0	0	0	0	0	0	0	0	0	0	0
St8sia5	0	0	0	0	0	0	0	0	0	0	0	0	0	0	0	0	-0.579855
Clec11a	0	0	0	0	0	0	0	0	0	0	0	0	0	0	0	0	0
B4galt5	0	0	0	0	0	0	0	0	0	0	0	0	-0.272874	0	0	0	0
Manba	0	0	0	0	0	0	0	0	0	0	0	0	0	0	0	0	-0.464315
Sdc1	0	0	0	0	0	0	0	0	0	0	0	0	0	0	0	-0.785626	0
Cd44	0	0	-0.397124	0	0	-0.44635	0	0	0	0	-0.324076	0	0	0.275783	0	-0.304241	0
Fbxo27	-0.426698	0	0	0	0	0	0	0	0	0	0	0	0	0	0	0	0
Galk2	0	0	0	-0.305506	0	0	0	0	0	0	0	0	0	0	0	0	0
B3galt1	0	0	0	0	0	0	0	0	0	0	0	0	0	0	0	0	-0.833572
Alg12	0	0	0	0	0	0	0	0	0	0	0	0	0	0	0	0	0
Galnt6	0	0	0	-0.314067	0	0	0	0	0	0	0	0	0	0	0	-0.537892	0
Fbxo2	0	0	0	0	0	0	0	0.607047	0	0	0	0	0	0	0	0.856786	0
Hexb	0	0	0	-0.266074	0	0	0	0	-0.802233	-0.287237	0	-0.262412	0	0	0.808843	-0.806974	-0.826953
Sdc4	0	0	0	0	0	0	0	0	0	0	0	0	0	0	0	0	0
B4galt6	0	0	0	0	0	0	0	0	0	0	0	0	0	0	0	0	0
B4galnt3	0	0	0	0	0	0	0	0	0	0	0	0	0	0	0	0	0
Clec4d	0	0	0	0	0	0	0	0	0	0	0	0	0	0	0	0	0.45328
Slc35d1	0	0	0	0	0	0	0	0	0	0	0	0	0	0	0	0	0
Neu3	0	0	0	0	0	0	0	0	0	0	0	0	0	0	0	0	0
Sele	0	0	0	0	0	0	0	0	0	0	0	0	0	0	0	-0.38366	0
Mgat3	0	0	0	0	0	0	0	0	0	0	0	0	0	0	0	0	0
Gal3st3	0	0	-0.319603	0	0	0	0	0	0	0	0	0	0	0	0.6637	0	0
Glce	0	0	-0.320401	0	0	0	0	0	-0.667783	0	-0.302654	0	0	0	0	0	-0.779987
Gfpt1	0	0	0	0	0	-0.409806	0	0	0	0	0	0	0	0	0	-0.432373	0.409712
Gne	0	0	0	0	0	0	0	-0.344963	0	0	0	0	0	0	0	0	0
Alg3	0	0	0	0	0	0	0	0.623034	0	0	0	0	0	0	0	0.496819	-0.45428
Dolk	0	0	0	0	0	0	0	0	0	0	0	0	0	0	0	0	-0.661623
Pigv	0	0	0	0	0	0	0	0	0	0	0	0	0	0	0	0	0
Calr3	0	0	0	0	0	-0.475247	0	-0.621139	0.348317	0	0	0	0	0	0	-0.867391	0.37509
Ogn	0	0	0	0	0	0	0	0	-0.64983	0	0	0	0	0.598798	0	-0.476817	-0.697757
Col9a1	0	0	0	0	0	0	0	0	0	0	0	0	0	0	0	0	0
Man2a2	0	0	0	0.47917	0	0	0	0	0	0	0	0	-0.466611	0	0	0	0
Canx	0	0	0	0	0	-0.431126	0	0	0	0	0	0	0	0	0	0	0
C1galt1	0	0	0	0	0	0	0	0	0	0	0	0	0.276545	0	0	0	0
Alg10b	0	0	0	0	0	0	0	0	0	0	0	0	0	0	0	0	0
Clec4g	0	0	0	-0.406457	0	0	0	0	0	0	0	0	0	0	0	0	0
Colec12	0	0	-0.376658	-0.297023	0	0	-0.46383	-0.437723	0	0	0	0	0	0	0	-0.41972	0
Slc35c1	0	0	0	0	0	0	0	0	0	0	0	0	0	0	0	0	0
Galnt5	0	0	0	0	0	0	0	0	0	0	0	0	0	0	0	0	0
Chid1	0	0	0	0	0	0	0	0	0	0	0	0	0	0	0	0	0
Nanp	0	0	0	0	0	0	0	0	0	0	0	0	0	0	0	0	0
Hs2st1	0	0	0	0	0	0	0	0	0	0	0	0	0	0	0	0	-0.4482
Klrc1	0	0	0	0	0	0	0	0	0	0	0	0	0	0	0	0	0
Alg2	0	0	0	0	0	0	0	0	-0.850822	0	0	0	0	0	0	0	-1.06717
Pigg	0	0	0	0	0	0	0	0	0	0	0	0	0	0	0	0	0
B3gntl1	0	0	0	0	0	0	0	0	0	0	0	0	0	0	0	0	-0.509644
C1galt1c1	0	0	0	0	0	0	0	0	0	0	0	0	0	0	0	0	0
Fbxo17	0	0	0	0	0	0	0	0	0	0.321965	0	0	0	0	0	0	0
Gtdc1	0	0	0	0	0	0	0	0	0	0	0	0	0	0	0	0	0
Dgcr2	0	0	0	0	0	0	-0.523487	0	0	0	0	0	0	0	-0.525159	0	0
Hgsnat	0	0	0	0	0	0	0	0	0	0	0	0	0	0	0	0	-0.876519
St6galnac6	0	0	0	0	0	0	-0.380684	0	0	0	0	0	0	0	0	0	0
St3gal4	0	0	0	0	0	0	0	0	0	0	0	0	0	0	0	0	0
Fbxo44	0	0	0	0	0	0	0	0	0	0	0	0	0	0	0	0.767537	0
Gaa	0	0	0	0	0	0	0	0	0	0	0	0	0	0	0	0	0
Dhdds	0	0	0	0	0	0	0	0	0	0	0	0	0	0	0	0	-0.411119
B3gnt6	0	0	0	0	0	-0.361059	0	0	0	0	0	0	0	0	0	0	0
Ly75	0	0	0	0	0	0	0	0	0	0	0	0	0	0	0	0	0.313886
Klrb1a	0	0	0	0	0	-0.491149	0	0	0	0	0	0	0	0	0	0	0
Plod3	0	0	0	0	0	0	0	0	0	0	0	0	0	0	0	0.645716	0
Tmtc1	0	0	0	-0.396463	0	0	0	-0.372388	0.304535	0	0	-0.365392	0	0	-0.321987	-0.37274	0.28097
Gpc4	0	0	0	-0.421494	0	0	-0.329063	0	0	0	0	-0.440312	0	0	-0.438079	0	-0.328526
B3gat1	0	0	0.269098	0	0	-0.387487	0	-0.465238	-0.893815	0	0	0	0	-0.403421	0	-0.35036	-1.1599
Lman2l	0	0	0	0	0	0	0	0	0	0	0	0	0	0	0	0.715166	-0.827672
Gmppa	0	0	0	0	0	0	0	-0.595785	0	0	0	0	0	-0.425059	0	0	-0.643112
Cd302	0	0	0	0	0	0	0	0	0.392718	0	0	0	0	0	0	0	0.439255
Ugp2	0	0	0	0	0	0	0	0	0	0	0	0	0	0	0	0	0
St6galnac1	0	0	0	0	0	0	0	0	0	0	0	0	0	0	0	0	0
Galnt1	0	0	0	0	0	-0.422064	0	0	0	0	0	0	0	-0.397686	0	0	0
Slc35a1	0	0	0	0	0	0	0	0	0	0	0	0	-0.485017	0	0	0	0
Ugt2a3	0	0	0	0	0	-0.407161	0	-0.339358	0	0	0	0	0	0	0	-0.385668	0
Pigs	0	0	0	0	0	0	0	0	0	0	0	0	0	0	0	0	0
Ncan	0	0	0	0	0	0	0	0	0	0	0	0	0	0	0	0	0
Lman2	0	0	0	0	0	0	0	0	0	0	0	0	0	0	0	0	0
Slc35b1	0	0	0	0	0	0	0	0	0	0	0	0	0	0	0	0	0
Lgals8	0	0	0	0	0	0	0	0	0	0	0	0	0	0	0	0	0
Mpi	0	0	0	0	0	0	0	0.495019	0	0	0	0	0	0	0	0.495162	0
Mgat1	0	0	0	0	0	0	0	0	0	0	-0.326566	0	0	0	0	0	0
Kl	0	0	0	0	0	-0.482647	1.09233	0	0	0	0	0	0	1.20291	0	0.847696	0.541225
Gal3st1	0	0	0	0	0	0	0	0	0	0	0	0	0	0	0.497072	0.512079	0
Lgals7	0	0	0	0	0	-0.460849	0	0	0	0	0.235327	0	0	0	0.304348	-0.357171	0.287975
Lgals7	0	0	0	0	0	-0.460849	0	0	0	0	0.235327	0	0	0	0.304348	-0.357171	0.287975
Dpm2	0	0	0	0	0	0	0	0.563223	0	0	0	0	0	0	0	0.674987	0
Edem2	0	0	0	0	0	0	0	0.668617	0	0	0	0	0	0	0	0.649431	0
Fbxo6	0	0	0	0	0	0	0	0	0	0	0	0	0	0	0	0.599176	0
B3gnt9	0	0	0.420176	0	0	0.340626	0	0	0	0	0	0	0.386665	0	0	0.575859	-0.538007
Arsa	0	0	0	0	0	0	0	0	0	0	0	0	0	0	0	0.546286	0
Gfpt2	0.438827	0	0	0	0	0	0	0.451246	0	0	0	0	0	0	0	0.486688	0
Nagk	0	0	0	0	0	0	0	0.413372	0	0	0	0	0	0	0	0.433235	0
Lgals2	0	0	0	0	0	0	0	0	0	0	0	0	0	0	0	0.371853	0
Fut4	0	0	0	0	0	-0.3524	0	0.389567	0	0	0	0	0	0	0	0.350672	0
Fut10	0	-0.244729	0	0	0	0	0	0	0	0	0	0	0	0	0	0.341209	0
Neu4	0	0	0	0	0	0	0	0.373255	0	0	0	0	0	0	0	0.340107	0
Ugt2b35	0	0	0	0	0	-0.528193	0	0	0	0	0	0	0	0	0	0	0.556537
Fut2	0	0	0	0	0	0	0	0	0.381056	0	0	0	0	0	0	0	0.412098
Abo	0	0	0	-0.323935	0	0	0	0	0	0	0	0	0.373685	0	0	0	0.376016
Mgam	6.57002	0	0	0	0	0	0	0	0	0	0	0	0	0	0	0	0.361474
Cd69	0	0	0	0	0	0	0	0	0	0	0	0	0	0	0	0	0.35267
Pigm	0	0	0	0	0	0	0	0	0	0	0	0	0	0	0	0	0.336775
Reg3b	0	0	0	0	0	0	0	0	0	0	0	0	0	0	0	0	0.31927
Hs3st3b1	1.68078	0	0	0	0	-0.410939	0	0	0.314145	0	0	0	0	0	0	0	0.29877
Papss2	0	0	0	0	0	0	0	0	0	0	0	0	0	0	0	0	0.286593
Vcan	0	0	0	-0.336715	0	0	-0.398248	0	0	0	0	0	0	0	0	0	0.279178
Gcnt2	0	0	0	0	0	0	0	0	0	0	0	0	0	0	0	0	0.278991
Clec12a	2.89155	0	0	0	0	0	0	0	0	0	0	0	0	0	0	0	0
Hs3st3a1	1.59967	0	0.418604	0	0	0	0	0	0	0	0	0	0	0	0	0	0
Clec1a	0.957103	0	0.277507	-0.382288	0	0	0	0	0	0	0.298872	0	0.331778	0	0	0	0
Gpc3	0.776601	0	0	0	0	0	0	0	0	0	0	0	0	0	0	0	0
Mfng	0.590458	0	0	0	0	0	0	0	0	0	0	0	0	0	0	0	0
Chsy1	0.38161	0	0	0	0	0	0	0	-0.589085	0	0	0	0.341066	0	0	0	0
Chpf	0	0	0	0	0	0.710855	0	0	0	0	0	0	0	0	0	0	0
Pomgnt1	0	-0.35748	0	0	0	0.59444	0	0	0	0	0	0	0	0	0	0	0
Pigl	0	0	0	0	0	0.583576	0	0	0	0	0	0	0	0	0	0	0
Pgm2	0	0	0	0	0	0	0	0.626872	0	0	0	0	0	0	0	0	0
Gal3st2	0	0	0	-0.305495	0	0	0	0	0.391823	0	0	-0.28761	0	0	0	0	0
St8sia6	0	0	0	0	0	0	0	0	0	0	0	0	0	0	0	0	0
Mag	0	0	0	0	0	0	0	0	0	0	0	0	0	0	0	0	0
Alg11	0	0	0	0	0	0	0	0	0	0	-0.329698	0	0	0	0	0	0
Siglec15	0	0	0	0	0	0	0	0	0	0	0	0	0	0	0	0	0
Gbgt1	0	0	0	0	0	0	0	0	0	0	0	0	0	0	0	0	0
Chst10	0	0	0	0	0	0	0	0	0	0	0	0	0	0	0	0	0
Fut11	0	0	0	-0.290847	0	0	0	0	0	0	0	0	0	0	0	0	0
A3galt2	0	0	0	-0.332795	0	0	0	0	0	0.249099	0	0	0	0	0	0	0
A4galt	0	0	0	-0.290818	0	0	0	0	0	0	0	0	0	0	0	0	0
Alg14	0	0	0	0	0	0	0	0	0	0	0	0	0	0	0	0	0
Atrn	0	-0.49725	0	0	0	0	0	0	0	0	0	0	0	0	0	0	0
B3galnt1	0	0	0	0	0	0	0	0	0	0	0	0	0	0	0	0	0
B3gnt5	0	0	-0.320171	0	0	0	0	0	0	0	0	0	0	0	0	0	0
Cd209a	0	0	0	0	0	0	0	0	0	0	0	0	0	0	0	0	0
Clec7a	0	0	-0.3694	0	0	0	0	0	0	0	0	0	0	0	0	0	0
Engase	0	0	0	0	0	0	0	0	0	0	0	0	0	0	0	0	0
Galnt12	0	0	0	-0.259817	0	0	0	0	0	0	0	0	0	0	0	0	0
Has2	0	0	-0.334315	0	0	0	0	0	0	0	0	0	0	0	0	0	0
M6pr	0	0	0	0	0	0	0	0	0	0	0	0	0	0	0	0	0
Mgat4b	0	-0.308925	0	0	0	0	0	0	0	0	0	0	0	0	0	0	0
Nagpa	0	0	0.292939	0	0	0	0	0	0	0	0	0	0	0	0	0	0
Neu2	0	0	0.79765	0	0	0	0	0	0	0	0	0	0	0	0	0	0
Pigf	0	0	0	0	0	0	0	0	0	0	0	0	0	0	0	0	0
Pigyl	0	0	0	0	0	0	0	0	0	0	0	0	0	0	0	0	0
Prg2	0	0	-0.368477	0	0	0	0	0	0	0	0	0	0	0	0	0	0
Smc3	0	0	-0.316123	0	0	0	0	0	0	0	0	0	0	0	0	0	0
St8sia3	0	0	0.864984	0	0	0	0	0	0	0	0	0	0	0	0	0	0
Tgfbr3	0	-0.366231	0	0	0	0	0	0	0	0	0	0	0	0	0	0	0
Ust	0	0	0	0	0	0	0	0	0	0	0	0	0	0	0	0	0
A4gnt	0	0	0	0	0	0	0	0	0	0	0	0	0	0	0	0	0
Aga	0	0	0	0	0	0	0	0	0	0	0	0	0	0	0	0	0
Alg1	0	0	0	0	0	0	0	0	0	0	0	0	0	0	0	0	0
Alg5	0	0	0	0	0	0	0	0	0	0	0	0	0	0	0	0	0
Apcs	0	0	0	0	0	0	0	0	0	0	0	0	0	0	0	0	0
Asgr1	0	0	0	0	0	0	0	0	0	0	0	0	0	0	0	0	0
Atrnl1	0	0	0	0	0	0	0	0	0	0	0	0	0	0	0	0	0
B3galt2	0	0	0	0	0	0	0	0	0	0	0	0	0	0	0	0	0
B3galt4	0	0	0	0	0	0	0	0	0	-0.337269	0	-0.314302	0	0	0	0	0
B3galt6	0	0	0	0	0	0	0	0	0	0	0	0	0	0	0	0	0
B3gnt2	0	0	0	0	0	0	0	0	0	0.359811	0	0	0	0	0	0	0
B3gnt3	0	0	0	0	0	0	0	0	0	0	-0.297638	0	0	0	0	0	0
B4galnt2	0	0	0	0	0	0	0	0	0	0	0	0	0	0	0	0	0
B4galnt4	0	0	0	0	0	0	0	0	0	0	0	0	0	0	0	0	0
B4galt2	0	0	0	0	0	0	0	0	0	0	0	0	0	0	0	0	0
B4galt7	0	0	0	0	0	0	0	0	0	0	0	0	0	0	0	0	0
B4gat1	0	0	0	0	0	0	0	0	0	0	0	0	0	0	0	0	0
Bcan	0	0	0	0	0	0	0	0	0	0	0	0	0	0	0	0	0
Cd248	0	0	0	0	0	0	0	0	0	0	0	0	0	0	0	0	0
Chil1	0	0	0	0	0	0	0	0	0	0	0	0	0	0	0	0	0
Chpf2	0	0	0	0	0	0	0	0	0	0	0	0	0	0	0	0	0
Chst12	0	0	0	0	0	0	0	0	0	0	0	0	0	0	0	0	0
Chst13	0	0	0	0	0	0	0	0	0	0	0	0	0	0	0	0	0
Chst14	0	0	0	0	0	0	0	0	0	0	0	0	0	0	0	0	0
Chst15	0	0	0	0	0	0	0	0	0	0	0	0	0	0	0	0	0
Chst7	0	0	0	0	0	0	0	0	0	0	0	0	0	0	0	0	0
Chst8	0	0	0	0	0	0	0	0	0	0	0	0	0	0	0	0	0
Clec10a	0	0	0	0	0	0	0	0	0	0	0	0	0	0	0	0	0
Clec12b	0	0	0	0	0	0	0	0	0	0	0	0	0	0	0	0	0
Clec2f	0	0	0	0	0	0	0	0	0	0	0	0	0	0	0	0	0
Clec4a2	0	0	0	0	0	0	0	0	0	0	0	0	0.338669	0	0	0	0
Clec4f	0	0	0	0	0	0	0	0	0	0	0	0	0	0	0	0	0
Clec4n	0	0	0	0	0	0	0	0	0	0	0	0	0	0	0	0	0
Clec5a	0	0	0	0	0	0	0	0	0	0	0	0	0	0	0	0	0
Clgn	0	0	0	0	0	0	0	0	0	0	0	0	0	0	0	0	0
Cmas	0	0	0	0	0	0	0	0	0	0	0	0	0	0	0	0	0
Col12a1	0	0	0	0	0	0	0	0	0	0	0	0	0	0	0	0	0
Col15a1	0	0	0	0	0	0	0	0	0	0	0	0	0	0	0	0	0
Colec10	0	0	0	0	0	0	0	0	0	0	0	0	0	0	0	0	0
Dolpp1	0	0	0	0	0	0	0	0	0	0	0	0	0	0	0	0	0
Dpm1	0	0	0	0	0	0	0	0	0	0	0	0	0	0	0	0	0
Dpy19l1	0	0	0	0	0	0	0	0	0	0	0	0	0	0	0	0	0
Eogt	0	0	0	0	0	0	0	0	0	0	0	0	0	0	0	0	0
Erlec1	0	0	0	0	0	0	0	0	0	0	0	0	0	0	0	0	0
Fkrp	0	0	0	0	0	0	0	0	0	0	0	0	0	0	0	0	0
Fktn	0	0	0	0	0	0	0	0	0	0	0	0	0	0	0	0	0
Fmod	0	0	0	0	0	0	0	0	0	0	0	0	0.32482	0	0	0	0
Fuca1	0	0	0	0	0	0	0	0	0	0	0	0	0	0	0	0	0
Fuom	0	0	0	0	0	0	0	0	0	0	0	0	0	0	0	0	0
Gal3st4	0	0	0	0	0	0	0	0	0	0	0	0	0	0	0	0	0
Galk1	0	0	0	0	0	0	0	0	0	0	0	0	0	0	0	0	0
Galns	0	0	0	0	0	0	0	0	0	0	0	0	0	0	0	0	0
Galnt11	0	0	0	0	0	0	0	0	0	0	0	0	0	0	0	0	0
Galnt15	0	0	0	0	0	0	0	0	0	0	0	0	0	0	0	0	0
Galnt16	0	0	0	0	0	0	0	0	0	0	0	0	0	0	0	0	0
Galnt18	0	0	0	0	0	0	0	0	0	0	0	0	0	0	0	0	0
Galnt4	0	0	0	0	0	0	0	0	0	0	0	0	0	0	0	0	0
Galnt7	0	0	0	0	0	0	0	0	0	0	0	0	0	0	0	0	0
Galntl5	0	0	0	0	0	0	0	0	0	0	0	0	0	0	0	0	0
Galntl6	0	0	0	0	0	0	0	0	0	0	0	0	0	0	0	0	0
Ganab	0	0	0	0	0	0	0	0	0	0	0	0	0	0	0	0	0
Gla	0	0	0	0	0	0	0	0	0	0	0	0	0	0	0	0	0
Gmds	0	0	0	0	0	0	0	0	0	0	0	0	0	0	0	0	0
Gpc5	0	0	0	0	0	0	0	0	0	0	0	0	0	0	0	0	0
Gxylt1	0	0	0	0	0	0	0	0	0	0	0	0	0	0	0	0	0
Gxylt2	0	0	0	0	0	0	0	0	0	0	0	0	0	0	0	0	0
Gyg	0	0	0	0	0	0	0	0	0	0	0	0	0	0	0	0	0
Has1	0	0	0	0	0	0	0	0	0	0	0	0	0	0	0	0	0
Has3	0	0	0	0	0	0	0	0	0	0	0	0	0	0	0	0	0
Hexa	0	0	0	0	0	0	0	0	0	0	0	0	0	0	0	0	0
Hk2	0	0	0	0	0	0	0	0	0	0	0	0	0	0	0	0	0
Hk3	0	0	0	0	0	0	0	0	0	0	0	0	0	0	0	0	0
Hs3st2	0	0	0	0	0	0	0	0	0	0	0	0	0	0	0	0	0
Hs3st4	0	0	0	0	0	0	0	0	0	0	0	0	0	0	0	0	0
Hs3st5	0	0	0	0	0	0	0	0	0	0	0	0	0	0	0	0	0
Hs3st6	0	0	0	0	0	0	0	0	0	0	0	0	0.359701	0	0	0	0
Hs6st1	0	0	0	0	0	0	0	0	0	0	0	0	0	0	0	0	0
Hs6st3	0	0	0	0	0	0	0	0	0	0	0	0	0	0	0	0	0
Klrd1	0	0	0	0	0	0	0	0	0	0	0	0	0	0	0	0	0
Klrg2	0	0	0	0	0	0	0	0	0	0	0	0	0	0	0	0	0
Lfng	0	0	0	0	0	0	0	0	0	0	0	0	0	0	0	0	0
Lman1l	0	0	0	0	0	0	0	0	0	0	0	0	0	0	0	0	0
Lum	0	0	0	0	0	0	0	0	0	0	0	0	0	0	0	0	0
Mbl2	0	0	0	0	0	0	0	0	0	0	0	0	0	0	0	0	0
Mgat4d	0	0	0	0	0	0	0	0	0	0	0	0	0	0	0	0	0
Mogs	0	0	0	0	0	0	0	0	0	0	0	0	0	0	0	0	0
Mrc1	0	0	0	0	0	0	0	0	0	0	0	0	0	0	0	0	0
Nans	0	0	0	0	0	0	0	0	0	0	0	0	0	0	0	0	0
Neu1	0	0	0	0	0	0	0	0	0	0	0	0	0	0	0	0	0
Oga	0	0	0	0	0	0	0	0	0	0	0	0	0	0	0	0	0
Olr1	0	0	0	0	0	0	0	0	0	0	0	0	0.450762	0	0	0	0
Papss1	0	0	0	0	0	0	0	0	0	0	0	0	0	0	0	0	0
Pgghg	0	0	0	0	0	0	0	0	0	0	0	0	0	0	0	0	0
Pgm3	0	0	0	0	0	0	0	0	0	0	0	0	0	0	0	0	0
Pigb	0	0	0	0	0	0	0	0	0	0.279981	-0.237104	0	0	0	0	0	0
Pigc	0	0	0	0	0	0	0	0	0	0	0	0	0	0	0	0	0
Pkd1	0	0	0	0	0	0	0	0	0	0	0	0	0	0	0	0	0
Pla2r1	0	0	0	0	0	0	0	0	0	0	0	0	0	0	0	0	0
Pofut1	0	0	0	0	0	0	0	0	0	0	0	0	0	0	0	0	0
Poglut1	0	0	0	0	0	0	0	0	0	0	0	0	0	0	0	0	0
Pomgnt2	0	0	0	0	0	0	0	0	0	0	0	0	0	0	0	0	0
Prelp	0	0	0	0	0	0	0	0	0	0	0	0	0	0	0	0	0
Pxylp1	0	0	0	0	0	0	0	0	0	0	0	0	0	0	0	0	0
Reg1	0	0	0	0	0	0	0	0	0	0	0	0	0	0	0	0	0
Reg2	0	0	0	0	0	0	0	0	0	0	0	0	0	0	0	0	0
Reg4	0	0	0	0	0	0	0	0	0	0	0	0	0	0	0	0	0
Sdc2	0	0	0	0	0	0	0	0	0	0	0	0	0	0	0	0	0
Sell	0	0	0	0	0	0	0	0	0	0	0	0	0	0	0	0	0
Siglecf	0	0	0	0	0	0	0	0	0	0	0	0	0	0	0	0	0
Slc35b3	0	0	0	0	0	0	0	0	0	0	0	0	0	0	0	0	0
Slc35d2	0	0	0	0	0	0	0	0	0	0	0	0	0	0	0	0	0
St3gal3	0	0	0	0	0	0	0	0	0	0	0	0	0	0	0	0	0
St3gal5	0	0	0	0	0	0	0	0	0	0	0	0	0	0	0	0	0
St3gal6	0	0	0	0	0	0	0	0	0	0	0	0	0	0	0	0	0
Thbd	0	0	0	0	0	0	0	0	0	0	0	0	0	0	0	0	0
Uggt1	0	0	0	0	0	0	0	0	0	0	0	0	0	0	0	0	0
Ugt1a1	0	0	0	0	0	0	0	0	0	0	0	0	0	0	0	0	0
Ugt1a5	0	0	0	0	0	0	0	0	0	0	0	0	0	0	0	0	0
Ugt2a2	0	0	0	0	0	0	0	0	0	0	0	0	0	0	0	0	0
Ugt2b34	0	0	0	0	0	0	0	0	0	0	0	0	0	0	0	0	0
Xxylt1	0	0	0	0	0	0	0	0	0	0	0	0	0	0	0	0	0
Zg16	0	0	0	0	0	0	0	0	0	0	0	0	0	0	0	0	0
Chst9	0	0	0	0	0	0	0	0	0	0	0	0	0	0	0	0	0
Gcnt3	0	0	0	0	0	0	0	0	0	0	0	0	0	0	0	0	0
Siglecg	0	0	0	0	0	0	0	0	0	0	0	0	0	0	0	0	0
Tmtc2	0	0	0	0	0	0	0	0	-0.388879	0	0	0	0	0	0	0	0
Ugt2a1	0	0	0	0	0	0	0	0	-0.498554	0	0	0	0	0	0	0	0
Fcer2a	0	0	0.282896	0	0	0	0	-0.331685	0	-0.292328	0	0	0	0	0	0	0
Alg9	0	0	0	0	0	0	0	-0.346611	0	0	0	0	0	0	0	0	0
Omd	0	0	-0.351263	0	0	0	0	-0.36827	0	0	-0.329378	0	0	0	0	0	0
Crp	0	0	0	0	0	0	0	-0.394531	0	0	0	0	0	0	0	0	0
Ugt2b1	0	0	0	0	0	0	0	-0.448831	0	0	0	0	0	0	0	0	0
Fut1	0	0	0	0	0	0	0	-0.544349	0	0	0	0	0	0	0	0	0
Pomt1	0	0	0	0	0	0	-0.265072	-0.335909	0	0	0	0	0	0	0	0	0
St3gal1	0	0	-0.294642	0	0	0	-0.397078	0	0	0	0	0	0	0	0	0	0
Clec3a	0	0	0	0	0	0	-0.433266	0	0	0	0	0	0	0	0	0	0
St8sia2	0	0	0	0	0	0	-0.441265	0	0	0	0	0	0	0	0	0	0
Fut9	0	0	0	0	0	0	-0.484976	0	0	0	0	0	0.37108	0	0	0	0
St8sia1	0	0	0	0	0	0	-0.558834	0	0	0	0	0	0	0	0	0	0
Ugt1a10	0	0	0	0	0	0	-0.57286	-0.584172	0	0	0	0	0	0	0	0	0
Ugt1a10	0	0	0	0	0	0	-0.57286	-0.584172	0	0	0	0	0	0	0	0	0
Ugt1a10	0	0	0	0	0	0	-0.57286	-0.584172	0	0	0	0	0	0	0	0	0
Ugt1a10	0	0	0	0	0	0	-0.57286	-0.584172	0	0	0	0	0	0	0	0	0
Gale	0	0	0	0	0	-0.283433	0	0	0	0	0	0	0	0	0	0	0
Edem1	0	0	0	0	0	-0.305042	0	0	0	0	0.269421	0	0	0	0	0	0
Dse	0	0	0	0	0	-0.307556	0	0	0	0	0	0	0	0	0	0	0
Uxs1	0	0	0	0	0	-0.389879	0	0	0	0	0	0	0	0	0	0	0
Pign	0	0	0	-0.284358	0	-0.399793	0	0	0	0	0	0	0	0	0	0	0
Galm	0	-0.263057	0	0	0	-0.416251	0	0.461852	0	0	0	0	0	0	0	0	0
Cd22	0	0	0	0	0	-0.432558	0	0	0	0	0	0	0	0	0	0	0
Chst4	0	0	0	0	0	-0.480346	0	0	0	0	0	0	0	0	0	0	0
Gpc1	-0.327872	0	0	0	0	0	0	0	0	0	0	0	0	0	0	0	0
Man2a1	-0.533554	0	0	0	0	0	0	0	0	0	0	0	0	0	0	0	0
Gcnt4	-0.662534	0	0	0	0	0	0	0	0	0	0	0	0	0	0	0	0
Podn	-0.696645	0	0	0	0	0	0	0	0	0	0	0	0	0	0	0	0
Pigz	-0.728792	0	0	0	0	0	0	0	0	0	0	0	0	0	0	0	0
Layn	-0.730026	0	0	0	0	0	-0.466297	0	0	0	0	0	0	0	0	0	0
Lgals4	0	0	0	0	0	0	0	0	-0.373319	0	0	0	0	0	0	0	-0.348033
Chst11	0	0	0	0	0	0	0	0	0	0	0	0	0	0	0	0	-0.364418
Cd93	0	0	0	0	0	0	0	0	0	0	0	0	0	0	0	0	-0.374905
Chst3	0	0	0	0	0	0	0	0	0	0	0	0	0	0	0	0	-0.389135
Csgalnact1	0	0	0	0	0	0	0	0	0	0	0	0	0	0	0	0	-0.453815
Gcnt1	1.73225	0	0	0	0	0	0	0	0	0	0	0	0	0	0	0	-0.530414
Srd5a3	0	0	0	0	0	0	0	0	-0.532565	0	0	0	0	0	0	0	-0.530829
B3galt5	0	0	0	0	0	0	0	0	0	0	0	0	0	0	0	0	-0.535466
Ext1	0	0	0	0	0	0	0	0	-0.574503	0	0	0	0	0	0	0	-0.570007
Alg8	0	0	0.271227	0	0	0.405013	0	-0.347847	0	0	0	0	0	0	0	0	-0.575939
Os9	0	0	0	0	0	0	0	0	0	0	0	0	0	0	0	0	-0.607021
Ugcg	0	0	0	0	0	0	0	0	0	0	0	0	0	0	0	0	-0.635298
Anxa5	0	0	0	0	0	0	0	0	0	0	0	0	0	0	0	0	-0.637816
Uap1	-0.339529	0	0	0	0	0	0	0	0	0	0	0	0	0	0	0	-0.665507
Hs3st1	0	0	0	0	0	0	0	0	0	0	0	0	0	0	0	0	-0.674082
Tpst1	0	0	0	0	0	0	0	0	0	0	0	0	0	0	0	0	-0.687316
Fut8	0	0	0	0	0	0	0	0	0	0	0	0	0	0	0	0	-0.697822
Fpgt	0	0	0	0	0	0	0	0	-0.612103	0	0	0	0	0	0	0	-0.70422
St6gal1	0	0	0	0	0	0	0	0	0	0	0	0	0	0	0	0	-0.706557
Slc35c2	0	0	0	0	0	0	0	0	-0.555507	0	0	0	0	0	0	0	-0.713176
Pigp	0	0	0	0	0	-0.440408	0	0	0	0	0	0	0	0	0	0	-0.754634
Alg6	0	0	0	0	0	-0.456014	0	0	-0.661409	0	0	0	0	0	0	0	-0.760692
St6galnac5	0	0	0	0	0	0	0	0	0	0	0	0	0	0	0	0	-0.769292
Galnt2	0	0	0.298974	0	0	0	0	0	-0.339923	0	0	0	0	0	0	0	-0.845558
Gnpda1	0	0	0	0	0	0	0	0	-0.714305	0	0	0	0	0	0	0	-0.878573
Chst2	0	0	0	0	0	0	0	0	-0.640473	0	0	0	0	0	0	0	-0.891038
Prkcsh	0	0	0	0	0	0	0	0	-0.934794	0	0	0	0	0	0	0	-0.892782
Man1b1	0	0	0	0	0	0	0	0	-0.894127	0	0	0	0	0	0	0	-1.0343
Itln1	0	0	0	0	0	0	0	-0.385009	0	0	0	0	0	0	0	-0.394737	0
Clec4e	0	0	0	-0.462728	0	0	0	-0.461834	0	0	0.360901	-0.429075	0	0	0	-0.399829	0
Ids	0	0	0	0	0	0	0	-0.527186	0	0	0	0	0	0	0	-0.406509	-0.834677
Pofut2	0	0	0	0	0	0	0	0	0.37955	0	0	0	0	0	0	-0.444924	0
Clec4b1	0	0	0	-0.353097	0	-0.395991	0	0	0	0	0	0	0.343735	0	0	-0.457325	0
Man1a2	0	0	0	0	0	0	0	-0.352227	0	0	0	0	0	0	0	-0.472783	0.371193
Galnt13	0	0	0	0	0	0	0	0	-0.465788	0	0	0	0	0	0	-0.489408	0
Col9a2	0	0	0	0	0	0	0	0	-0.500803	0	0	0	0	0	0	-0.531805	-0.558597
B3gat2	0	0	0	0	0	0	0	-0.399947	0	0	0	0	0	0	0	-0.551559	0
Dsel	0	0	0	0	0	0	0	0	0	0	0	0	0	0	0	-0.575691	-0.429247
Ugdh	0	0	0	0	0	0	0	0	0	0	0	0	0	0	0	-0.650339	0
Hs6st2	0.528454	0	0	0	0	0	0	0	-0.80295	0	0	0	0	0	0	-0.79244	-0.852018
Calr	0	0	0	0	0	0	0	-0.893433	0	0	0	0	0	0	0	-1.00385	0
Cd209e	0	0	0	0	0	0	0	0	0	0	0	0	0	0	-0.370351	0	0
B3gnt8	0	0	0	0	0	0	-0.37559	0	-0.493621	0	0	0	0	0	-0.40321	0	0
B3gat3	0	0	0	0	0	0	-0.345699	-0.38591	0	0	0	0	0	0	-0.405736	-0.545993	0
Mrc2	0	0	0	0	0	0	0	0	0.33222	0	0	0	0	0	-0.409448	0	0
Gusb	0	-0.289486	0	0	0	0	0	0	0	0	0	0	0	0	-0.412508	-0.432121	0
Anxa4	0	0	-0.258537	0	0	0	0	0	0	0	-0.265592	0	0	0	-0.423299	0	0
Galc	0	0	-0.34359	0	0	-0.286336	-0.460909	0	0.343088	0	0	0	0	0	-0.426104	0	0.321462
Man2b1	0	0	0	0	0	-0.486162	0	0	0	0	0	0	0	0	-0.4388	-0.411574	-0.677735
Glt1d1	0	0	0	0	0	0	-0.463296	0	0	0	0	0	0.280456	0	-0.441243	-0.435398	0
Clec14a	0	0	0	0	0	0	-0.662966	0	0	0	0	0	0	0	-0.478466	0	0
Kera	0	0	0	0	0	0	0	-0.59004	0.536773	0	0	0	0	0	-0.518433	-0.636326	0
Fcnb	0	0	0	0	0	0	-0.44667	0	0	0	0	0	0	0	-0.58464	0	0
Aspn	0	0	0	0	0	0	-0.536525	0	0	0	0	0	0	0	-0.639952	0	0
Clec3b	0.884147	0	0	0	0	-0.528877	0	0	0	0	0	0	0	-0.339379	0	0	0
Npl	0	0	0	0	0	-0.399454	0	0	0	0	0	0	0	-0.398619	0	0	0
Pmm2	0	0	0	0	0	0	0	0	-0.402142	0	0	0	0	-0.443979	0.432064	0	-0.412619
Gmppb	0	0	0	0	0	0	0	0	0	0	0	0	0	-0.446099	0	0	0
Glt8d2	-0.850637	0	0	0	0	-0.572188	0	0	0	0	0	0	0	-0.46999	0	0	0
Man1c1	0	0	0	0	0	0	0	0	0	0	0	0	0	0	0	0	0
Piga	0	0	-0.352814	0	0	0	0	-0.395883	0	0	-0.371287	0	0	0	0	-0.35438	-0.633197
Siglece	0	0	-0.436728	0	0	0	0	-0.610072	0	0	-0.395685	0	0	0	0	-0.62378	0
Pgm1	0	0	0	0	0	0	0	0	0	0	0	0	0	0	0	0	0
St8sia4	0	0	0	0	0	0	0	0	0	0	0	0	0	0	0	0	0
Sdc3	0	0	0	0	0	0	0	0	0	0	0	0	0	0	0	0	0
Colec11	0	0	0	0	0	0	0	0	0	0	0	0	0.361049	0	0	0	0
Lgals9	0	-0.316427	0	0	0	0	0	0	0	-0.288792	0	0	0	0	0	0	-0.422507
Ugt2b37	0	0	0	0	0	0	0	0	0	0	0	0	0	0	0	0	0
Pigq	0	0	0	0	0	0	0	0	0	0	0	0	0	0	0	0	-0.841913
Pigh	0	0	0	0	0	0	0	0	0	0	0	0	0	0	0	0	0
Agrn	0	0	0	0	0	0	0	0	0	0	0	0	0	0	0	0	0
Glt8d1	0	0	0	0	0	0	0	0	0	0	0	0	0	0	0	0	-1.02657
Col9a3	0	0	0	0	0	0	0	0	0	0	0	0	0	0	0	0	0
Asgr2	0	0	0	0	0	0	0	0	0	0	0	0	0	0	0	0	0
Chst1	0	0	0	0	0	0	0	0	0	0	0	0	0	0	0	0	0
St6galnac2	0	0	0	0	0	0	0	0	0	0	0	0	0	0	0	0	0
Ndst2	0	0	0	0	0	0	0	0	0	0	0	0	0	0	0	0	0
St6galnac3	0	0	0	0	0	0	0	0	0	0	0	0	0	0	0	0	0
Masp2	0	0	0	0	0	0	0	-0.519707	0	0	0	0	0	0	-0.453203	-0.443644	0
Gck	0	0	0	0	0	0	0	0	0	0	0	0	0	0	0	0	0
B4galt1	0	0	0	0	0	0	0	0	0	0	0	0	0	0	0	0	0
Dcn	0	-0.393317	0	0	0	0	0.97154	0	-0.641587	-0.273818	0	0	0	0	0	0	-0.599133
Fuca2	0	0	0	0	0	0	0	0	0	0	0	0	0	0	0	0	0
Pomt2	0	0	0	0	0	0	0	0	0	0	0	0	0	0	0	0	0
Pigu	0	0	0	0	0	0	0	0	0	0	0	0	0	0	0	0	0
Tmtc4	0	0	0	0	0	0	-0.740923	0	0	-0.255427	0	0	0	0	-0.927606	-0.488755	0
Clec16a	0	0	0	0	0	-0.368068	0	0	0	0	0	0	0	0	0	0	-0.45279
Mgat5	0	0	0	0	0	-0.556876	-0.541917	0	-0.44807	0	0	0	0.25351	0	-0.773509	0.409173	0
Uggt2	0	0	0	0	0	0	0	0	0	0	0	0	0	0	0	0	0
Pigw	0	0	0	0	0	0	0	0	0	0	0	0	0	0	0	0	0
Ndst1	0	0	0	0	0	0.516737	0	0	-0.629755	0	0	0	0.280192	0	0	0	-0.777999
Tmtc3	0	0	0	0	0	0	0	0	0	0	0	0	0	0	0	0	0
B3gnt7	0	0	-0.315673	0	0	0	0	0	0	0	0	0	0	0	0	0	0
Slc35a4	0	0	0	0	0	0	0	0	0	0	0	0	0	0	0	0	-0.658382
Lman1	0	0	0	0	0	0	0	0	0	0	0	0	0	0	0	0	0
Galnt9	-0.717295	0	0	0	0	-0.317505	0	0	0	0	0	0	0	0	0	0	0
St6galnac4	0	0	0	0	0	0	0	0	0	0	0	0	0	0	0	0.309224	0
Frem1	0	0	0	0	0	0	0	0	0	0	0	0	0	0	0	0	0
Gnpnat1	0	0	0	0	0	0	0	0	0	0	0	0	0	0	0	0	0.432973
Mgat4c	0.608396	0	0	0	0	0	0	0	0	0	0	0	0	0	0	0	0
Mgat4a	0	0	0	-0.324746	0	0	0	0	0	0	0	0	0	0	0	0	0
Mgat2	0	0	0	0	0	0	0	-0.545486	0	0	0	0	0	0	0	0	0
Arsk	0	0	0	0	0	0	0	0	0	0	0	0	0	0	0	0	0
Chodl	1.77919	0	0	0	0	0	0	0	0	0	0	0	0	0	0	0	0
B4galt4	0	0	0.314637	0	0	0	0	0	0	0	0	0	0	0	0	0	0
Pigx	0	0	0	0	0	0	0	0	0	0	0	0	0	0	0	0	0
B3gnt4	0	0	0	0	0	0	0	0	0	0	0	0	0	0	0	0	0
Gnpda2	0	0	0	0	0	0	0	0	0	0	0	0	0	0	0	0	0
Klrg1	0	0	0	0	0	0	0	0	0	0	0	0	0	0	0	0	0
B3galnt2	0	0	-0.314069	0	0	-0.452301	0	0	0	0	-0.342612	0	0	0	0	-0.535249	0
Slc35a3	0	0	0	0	0	-0.359511	0	0	0	0	0	0	0	0	0.42254	0	0
Mgat5b	0	0	0	0	0	0	-0.303353	0	0.464807	0	0	0	0	0	0	0	0
Clec18a	0	0	0	0	0	0	0	0	0	0	0	0	0	0	0	0	0
	15	0	2	0	0	5	2	7	2	0	0	0	0	3	3	13	2
	10	0	0	0	0	5	11	17	21	1	0	0	0	1	7	17	54

## Sheet: GlycogeneEnrichmentAnalysis
Supplementary Table S3: The functional enrichment analysis of glycogene DEGs generated from the UNIPROT and CPDB database (DEGs with 0.5 log fold change values)
The functional Enrichment analysis results generated from the UNIPROT and CPDB database. The significant DEGs with 0.5 log fold change values from the glycogene subset were used as the query terms for the pathway enrichement analysis. In UNIPROT database the UNIPROT ID for the DEGs were used as input terms to extract the functional annotation from the Retrieve/ID mapping feature. In CPDB database…
UNIPROT Database															CPDB enrichement analysis
Input	Input	MGI Gene/	Nomenclature			Ensembl ID	Entrez Gene ID	Uniprot ID	Function [CC]	Pathway	Gene ontology (biological process)	Gene ontology (molecular function)	Protein families		4 time points in Striatal tissue										4 time points in Striatal tissue
	Type	Marker ID	Symbol	Name	Feature Type										Ketamine Treatment										Phencyclidine Treatment
Fmod	current symbol	MGI:1328364	Fmod	fibromodulin	protein coding gene	ENSMUSG00000041559	14264	P50608	Affects the rate of fibrils formation. May have a primary role in collagen fibrillogenesis.	0	0	0	Small leucine-rich proteoglycan (SLRP) family, SLRP class II subfamily		Ketamine Treatment - Striatal Tissue-8hr										Phencyclidine Treatment - Striatal Tissue-8hr
Epyc	current symbol	MGI:107942	Epyc	epiphycan	protein coding gene	ENSMUSG00000019936	13516	P70186	May have a role in bone formation and also in establishing the ordered structure of cartilage through matrix organization.	0	articular cartilage development [GO:0061975]; bone development [GO:0060348]; sensory perception of sound [GO:0007605]	0	Small leucine-rich proteoglycan (SLRP) family, SLRP class III subfamily		p-value	q-value	pathway	source	external_id	members_input_overlap	members_input_overlap_geneids	size	effective_size		p-value	q-value	pathway	source	external_id	members_input_overlap	members_input_overlap_geneids	size	effective_size
Pigs	current symbol	MGI:2687325	Pigs	phosphatidylinositol glycan anchor biosynthesis, class S	protein coding gene	ENSMUSG00000041958	276846	Q6PD26	Component of the GPI transamidase complex. Essential for transfer of GPI to proteins, particularly for formation of carbonyl intermediates (By similarity). {ECO:0000250}.	Glycolipid biosynthesis; glycosylphosphatidylinositol-anchor biosynthesis.	attachment of GPI anchor to protein [GO:0016255]	0	PIGS family		6.24497e-19	2.81024e-17	Glycosaminoglycan metabolism	Reactome	R-HSA-1630316	DCN; EXT1; NDST1; HEXB; BGN; CHSY1; OGN; HS6ST2; GLCE; B3GAT1; CHST2; KERA	2131; 1634; 3340; 4969; 9435; 27087; 11081; 22856; 26035; 633; 90161; 3074	119	119		6.45959e-20	6.78257e-18	Metabolism of carbohydrates	Reactome	R-HSA-71387	DCN; B3GALT5; AGL; HS3ST1; B3GALT1; EXT1; MAN2B1; HEXB; NDST1; GNPDA1; MANBA; BGN; IDS; OGN; HS6ST2; GLCE; ARSB; CHST2; B3GAT1; CSGALNACT1	8708; 2131; 1634; 3340; 4969; 26035; 9435; 411; 27087; 178; 55790; 10007; 10317; 4126; 4125; 633; 3423; 90161; 3074; 9957	285	284
Pigu	current symbol	MGI:3039607	Pigu	phosphatidylinositol glycan anchor biosynthesis, class U	protein coding gene	ENSMUSG00000038383	228812	Q8K358	Component of the GPI transamidase complex. May be involved in the recognition of either the GPI attachment signal or the lipid portion of GPI (By similarity). {ECO:0000250}.	Glycolipid biosynthesis; glycosylphosphatidylinositol-anchor biosynthesis.	attachment of GPI anchor to protein [GO:0016255]; GPI anchor biosynthetic process [GO:0006506]; protein localization to cell surface [GO:0034394]; regulation of receptor signaling pathway via JAK-STAT [GO:0046425]	0	PIGU family		5.31281e-16	1.19538e-14	Metabolism of carbohydrates	Reactome	R-HSA-71387	DCN; HEXB; EXT1; NDST1; GNPDA1; BGN; CHSY1; OGN; HS6ST2; GLCE; B3GAT1; CHST2; KERA	2131; 1634; 3340; 22856; 4969; 11081; 26035; 9435; 27087; 10007; 633; 90161; 3074	285	284		3.55048e-17	1.864e-15	Glycosaminoglycan metabolism	Reactome	R-HSA-1630316	DCN; HS3ST1; EXT1; ARSB; NDST1; HEXB; IDS; BGN; OGN; HS6ST2; GLCE; B3GAT1; CHST2; CSGALNACT1	2131; 1634; 3340; 4969; 9435; 411; 27087; 55790; 9957; 26035; 633; 3423; 90161; 3074	119	119
Pigt	current symbol	MGI:1926178	Pigt	phosphatidylinositol glycan anchor biosynthesis, class T	protein coding gene	ENSMUSG00000017721	78928	Q8BXQ2	Component of the GPI transamidase complex. Essential for transfer of GPI to proteins, particularly for formation of carbonyl intermediates (By similarity). {ECO:0000250}.	Glycolipid biosynthesis; glycosylphosphatidylinositol-anchor biosynthesis.	attachment of GPI anchor to protein [GO:0016255]; neuron apoptotic process [GO:0051402]; neuron differentiation [GO:0030182]	0	PIGT family		5.14971e-12	7.72456e-11	Heparan sulfate/heparin (HS-GAG) metabolism	Reactome	R-HSA-1638091	DCN; EXT1; NDST1; BGN; HS6ST2; GLCE; B3GAT1	633; 2131; 1634; 27087; 26035; 3340; 90161	54	54		2.34691e-16	8.21419e-15	Biosynthesis of the N-glycan precursor (dolichol lipid-linked oligosaccharide, LLO) and transfer to a nascent protein	Reactome	R-HSA-446193	DOLK; ALG6; ST6GAL1; ALG2; ALG3; ST8SIA5; UAP1; GMPPA; ALG8; FPGT; SRD5A3; ST6GALNAC5	22845; 10195; 29926; 29906; 8790; 29929; 85365; 79053; 81849; 6675; 79644; 6480	77	77
Clec16a	current symbol	MGI:1921624	Clec16a	C-type lectin domain family 16, member A	protein coding gene	ENSMUSG00000068663	74374	Q80U30	Regulator of mitophagy through the upstream regulation of the RNF41/NRDP1-PRKN pathway. Mitophagy is a selective form of autophagy necessary for mitochondrial quality control. The RNF41/NRDP1-PRKN pathway regulates autophagosome-lysosome fusion during late mitophagy. May protect RNF41/NRDP1 from proteosomal degradation, RNF41/NRDP1 which regulates proteosomal degradation of PRKN. Plays a key role…	0	autophagy [GO:0006914]; cellular response to starvation [GO:0009267]; endosomal transport [GO:0016197]; endosome to lysosome transport [GO:0008333]; negative regulation of autophagosome maturation [GO:1901097]; negative regulation of macroautophagy by TORC1 signaling [GO:1904766]; negative regulation of mitophagy [GO:1901525]; negative regulation of proteasomal ubiquitin-dependent protein catabol…	0	CLEC16A/gop-1 family		1.68082e-09	1.89092e-08	heparan sulfate biosynthesis	HumanCyc	PWY-6564	NDST1; B3GAT1; HS6ST2; EXT1; GLCE	27087; 2131; 3340; 90161; 26035	29	29		9.19176e-16	2.41284e-14	Asparagine N-linked glycosylation	Reactome	R-HSA-446203	DOLK; OS9; ALG8; ST6GAL1; GMPPA; ALG3; ST8SIA5; UAP1; ALG6; MAN1B1; ALG2; FPGT; PRKCSH; SRD5A3; ST6GALNAC5; LMAN2L; FUT8	29906; 8790; 22845; 79644; 6480; 11253; 81562; 10195; 2530; 79053; 29929; 29926; 5589; 85365; 81849; 6675; 10956	283	283
Chad	current symbol	MGI:1096866	Chad	chondroadherin	protein coding gene	ENSMUSG00000039084	12643	O55226	Promotes attachment of chondrocytes, fibroblasts, and osteoblasts. This binding is mediated (at least for chondrocytes and fibroblasts) by the integrin alpha(2)beta(1). May play an important role in the regulation of chondrocyte growth and proliferation (By similarity). {ECO:0000250}.	0	bone development [GO:0060348]; negative regulation of bone trabecula formation [GO:1900155]	0	Small leucine-rich proteoglycan (SLRP) family, SLRP class IV subfamily		2.06315e-08	1.85683e-07	Metabolism	Reactome	R-HSA-1430728	DCN; GNPDA1; TPST2; EXT1; NDST1; HEXB; UGT2A1; CHSY1; OGN; BGN; HS6ST2; SRD5A3; GLCE; B3GAT1; CHST2; KERA	79644; 2131; 27087; 8459; 10941; 3340; 1634; 90161; 3074; 22856; 4969; 11081; 26035; 633; 10007; 9435	1954	1952		1.61703e-13	3.39576e-12	Post-translational protein modification	Reactome	R-HSA-597592	DOLK; ALG8; ST6GAL1; ALG2; ALG3; ALG6; MAN1B1; PRKCSH; GCNT1; B3GNTL1; B3GNT9; SRD5A3; LMAN2L; OS9; PIGA; TPST2; TPST1; UAP1; GMPPA; PIGP; PIGQ; FPGT; ST6GALNAC5; GALNT2; ARSB; OGT; ST8SIA5; FUT8	29929; 29926; 9091; 79644; 146712; 11253; 8459; 51227; 8790; 22845; 6480; 411; 85365; 8460; 8473; 2590; 5589; 2530; 6675; 29906; 5277; 10195; 81562; 79053; 81849; 10956; 84752; 2650	1425	1425
Col12a1	current symbol	MGI:88448	Col12a1	collagen, type XII, alpha 1	protein coding gene	ENSMUSG00000032332	12816	Q60847	Type XII collagen interacts with type I collagen-containing fibrils, the COL1 domain could be associated with the surface of the fibrils, and the COL2 and NC3 domains may be localized in the perifibrillar matrix. {ECO:0000250}.	0	cell adhesion [GO:0007155]; endodermal cell differentiation [GO:0035987]	0	Fibril-associated collagens with interrupted helices (FACIT) family		2.92156e-08	1.87814e-07	N-Glycan biosynthesis - Homo sapiens (human)	KEGG	path:hsa00510	MAN1B1; SRD5A3; ALG6; ALG2; MGAT5B	11253; 79644; 146664; 29929; 85365	50	50		4.25763e-13	7.45084e-12	N-Glycan biosynthesis - Homo sapiens (human)	KEGG	path:hsa00510	DOLK; ALG8; ST6GAL1; ALG2; ALG3; ALG6; MAN1B1; SRD5A3; FUT8	11253; 79644; 22845; 79053; 6480; 10195; 2530; 29929; 85365	50	50
Omd	current symbol	MGI:1350918	Omd	osteomodulin	protein coding gene	ENSMUSG00000048368	27047	O35103	May be implicated in biomineralization processes. Has a function in binding of osteoblasts via the alpha(V)beta(3)-integrin (By similarity). {ECO:0000250}.	0	cell adhesion [GO:0007155]; regulation of bone mineralization [GO:0030500]	0	Small leucine-rich proteoglycan (SLRP) family, SLRP class II subfamily		2.92156e-08	1.87814e-07	Chondroitin sulfate/dermatan sulfate metabolism	Reactome	R-HSA-1793185	DCN; B3GAT1; HEXB; BGN; CHSY1	27087; 633; 3074; 22856; 1634	50	50		8.92354e-13	1.33853e-11	Heparan sulfate/heparin (HS-GAG) metabolism	Reactome	R-HSA-1638091	DCN; HS3ST1; EXT1; NDST1; IDS; BGN; HS6ST2; GLCE; B3GAT1	633; 2131; 1634; 27087; 26035; 3340; 3423; 90161; 9957	54	54
Gpc2	current symbol	MGI:1919201	Gpc2	glypican 2 (cerebroglycan)	protein coding gene	ENSMUSG00000029510	71951	Q8BKV1	Cell surface proteoglycan that bears heparan sulfate. May fulfill a function related to the motile behaviors of developing neurons (By similarity). {ECO:0000250}.	0	cell migration [GO:0016477]; neuron differentiation [GO:0030182]; positive regulation of neuron projection development [GO:0010976]; regulation of protein localization to membrane [GO:1905475]; regulation of signal transduction [GO:0009966]; smoothened signaling pathway [GO:0007224]	0	Glypican family		6.66965e-08	3.75168e-07	heparan sulfate biosynthesis (late stages)	HumanCyc	PWY-6558	NDST1; HS6ST2; EXT1; GLCE	2131; 3340; 90161; 26035	22	22		2.15667e-11	2.83063e-10	heparan sulfate biosynthesis	HumanCyc	PWY-6564	EXT1; HS3ST1; NDST1; EXTL2; HS6ST2; GLCE; B3GAT1	27087; 2131; 2135; 3340; 90161; 9957; 26035	29	29
Gpc5	current symbol	MGI:1194894	Gpc5	glypican 5	protein coding gene	ENSMUSG00000022112	103978	Q8CAL5	Cell surface proteoglycan that bears heparan sulfate. {ECO:0000250}.	0	cell migration [GO:0016477]; positive regulation of canonical Wnt signaling pathway [GO:0090263]; regulation of protein localization to membrane [GO:1905475]	0	Glypican family		9.66431e-08	4.83216e-07	Glycosaminoglycan biosynthesis - heparan sulfate / heparin - Homo sapiens (human)	KEGG	path:hsa00534	NDST1; EXT1; HS6ST2; GLCE	3340; 90161; 26035; 2131	24	24		1.75863e-10	2.05173e-09	Synthesis of substrates in N-glycan biosythesis	Reactome	R-HSA-446219	DOLK; ST6GAL1; ST8SIA5; UAP1; GMPPA; FPGT; SRD5A3; ST6GALNAC5	22845; 29926; 29906; 8790; 81849; 6675; 79644; 6480	63	63
Gpc6	current symbol	MGI:1346322	Gpc6	glypican 6	protein coding gene	ENSMUSG00000058571	23888	Q9R087	Cell surface proteoglycan that bears heparan sulfate. Putative cell surface coreceptor for growth factors, extracellular matrix proteins, proteases and anti-proteases. Enhances migration and invasion of cancer cells through WNT5A signaling (By similarity). {ECO:0000250}.	0	cell migration [GO:0016477]; regulation of neurotransmitter receptor localization to postsynaptic specialization membrane [GO:0098696]; regulation of presynapse assembly [GO:1905606]; regulation of protein localization to membrane [GO:1905475]; regulation of signal transduction [GO:0009966]; synaptic membrane adhesion [GO:0099560]	0	Glypican family		2.83676e-07	1.27654e-06	HS-GAG biosynthesis	Reactome	R-HSA-2022928	NDST1; HS6ST2; EXT1; GLCE	2131; 3340; 90161; 26035	31	31		2.81563e-10	2.69429e-09	Metabolism of proteins	Reactome	R-HSA-392499	DOLK; ALG8; ST6GAL1; ALG2; ALG3; ALG6; MAN1B1; PRKCSH; GCNT1; B3GNTL1; B3GNT9; SRD5A3; LMAN2L; OS9; PIGA; TPST2; TPST1; UAP1; GMPPA; PIGP; PIGQ; FPGT; ST6GALNAC5; GALNT2; ARSB; OGT; ST8SIA5; FUT8	29929; 29926; 9091; 79644; 146712; 11253; 51227; 8790; 22845; 6480; 411; 85365; 8460; 8473; 2590; 5589; 2530; 6675; 29906; 5277; 10195; 81562; 79053; 81849; 10956; 84752; 2650; 8459	1935	1934
Gpc4	current symbol	MGI:104902	Gpc4	glypican 4	protein coding gene	ENSMUSG00000031119	14735	P51655	Cell surface proteoglycan that bears heparan sulfate. May be involved in the development of kidney tubules and of the central nervous system.	0	cell migration [GO:0016477]; regulation of neurotransmitter receptor localization to postsynaptic specialization membrane [GO:0098696]; regulation of presynapse assembly [GO:1905606]; regulation of protein localization to membrane [GO:1905475]; regulation of signal transduction [GO:0009966]; synaptic membrane adhesion [GO:0099560]; Wnt signaling pathway [GO:0016055]	0	Glypican family		3.67996e-07	1.50544e-06	Keratan sulfate/keratin metabolism	Reactome	R-HSA-1638074	OGN; HEXB; CHST2; KERA	3074; 11081; 4969; 9435	33	33		2.82259e-10	2.69429e-09	heparan sulfate biosynthesis (late stages)	HumanCyc	PWY-6558	EXT1; HS3ST1; NDST1; EXTL2; HS6ST2; GLCE	2131; 2135; 3340; 90161; 9957; 26035	22	22
Kera	current symbol	MGI:1202398	Kera	keratocan	protein coding gene	ENSMUSG00000019932	16545	O35367	May be important in developing and maintaining corneal transparency and for the structure of the stromal matrix.	0	cornea development in camera-type eye [GO:0061303]	0	Small leucine-rich proteoglycan (SLRP) family, SLRP class II subfamily		6.3561e-06	2.38354e-05	Chondroitin sulfate biosynthesis	Reactome	R-HSA-2022870	DCN; BGN; CHSY1	633; 22856; 1634	20	20		5.05929e-10	4.42688e-09	Glycosaminoglycan biosynthesis - heparan sulfate / heparin - Homo sapiens (human)	KEGG	path:hsa00534	EXT1; HS3ST1; NDST1; EXTL2; HS6ST2; GLCE	3340; 90161; 26035; 2131; 2135; 9957	24	24
Alg14	current symbol	MGI:1914039	Alg14	asparagine-linked glycosylation 14	protein coding gene	ENSMUSG00000039887	66789	Q9D081	Involved in protein N-glycosylation. Essential for the second step of the dolichol-linked oligosaccharide pathway. Anchors the catalytic subunit ALG13 to the ER (By similarity). {ECO:0000250}.	0	dolichol-linked oligosaccharide biosynthetic process [GO:0006488]	0	ALG14 family		7.40635e-06	2.56374e-05	chondroitin sulfate biosynthesis	HumanCyc	PWY-6569	B3GAT1; CHST2; CHSY1	27087; 22856; 9435	21	21		1.2905e-09	1.04233e-08	Chondroitin sulfate/dermatan sulfate metabolism	Reactome	R-HSA-1793185	DCN; ARSB; HEXB; IDS; BGN; B3GAT1; CSGALNACT1	27087; 633; 3423; 3074; 55790; 411; 1634	50	50
Fbxo44	current symbol	MGI:1354744	Fbxo44	F-box protein 44	protein coding gene	ENSMUSG00000029001	230903	Q8BK26	Substrate-recognition component of the SCF (SKP1-CUL1-F-box protein)-type E3 ubiquitin ligase complex. {ECO:0000250}.	0	glycoprotein catabolic process [GO:0006516]; proteasomal protein catabolic process [GO:0010498]; protein ubiquitination [GO:0016567]; SCF-dependent proteasomal ubiquitin-dependent protein catabolic process [GO:0031146]; ubiquitin-dependent ERAD pathway [GO:0030433]	0	0		1.0477e-05	3.36762e-05	Asparagine N-linked glycosylation	Reactome	R-HSA-446203	PRKCSH; ALG2; ALG6; MAN1B1; FPGT; SRD5A3	8790; 79644; 11253; 29929; 5589; 85365	283	283		1.16615e-08	8.74615e-08	Globo Sphingolipid Metabolism	Wikipathways	WP1424	B3GALT5; ST6GALNAC5; GCNT1; GALNT2; ST6GAL1	2590; 2650; 10317; 6480; 81849	19	19
Fbxo27	current symbol	MGI:2685007	Fbxo27	F-box protein 27	protein coding gene	ENSMUSG00000037463	233040	Q6DIA9	Substrate-recognition component of the SCF (SKP1-CUL1-F-box protein)-type E3 ubiquitin ligase complex. Able to recognize and bind complex-type oligosaccharides. {ECO:0000250}.	0	glycoprotein catabolic process [GO:0006516]; protein ubiquitination [GO:0016567]; SCF-dependent proteasomal ubiquitin-dependent protein catabolic process [GO:0031146]; ubiquitin-dependent ERAD pathway [GO:0030433]	0	0		1.15176e-05	3.45529e-05	Biosynthesis of the N-glycan precursor (dolichol lipid-linked oligosaccharide, LLO) and transfer to a nascent protein	Reactome	R-HSA-446193	ALG2; SRD5A3; FPGT; ALG6	8790; 29929; 85365; 79644	77	77		1.38022e-07	9.66156e-07	Proteoglycan biosynthesis	EHMN	Proteoglycan biosynthesis	B3GAT1; SLC35B4; EXTL2; EXT1; CSGALNACT1	27087; 2131; 2135; 55790; 84912	30	30
Fbxo17	current symbol	MGI:1354707	Fbxo17	F-box protein 17	protein coding gene	ENSMUSG00000030598	50760	Q9QZM8	Substrate-recognition component of the SCF (SKP1-CUL1-F-box protein)-type E3 ubiquitin ligase complex. Able to recognize and bind denatured glycoproteins, which are modified with complex-type oligosaccharides. Also recognizes sulfated glycans. Does not bind high-mannose glycoproteins (By similarity). {ECO:0000250}.	0	glycoprotein catabolic process [GO:0006516]; protein ubiquitination [GO:0016567]; SCF-dependent proteasomal ubiquitin-dependent protein catabolic process [GO:0031146]; ubiquitin-dependent ERAD pathway [GO:0030433]	0	0		1.43899e-05	4.04716e-05	A tetrasaccharide linker sequence is required for GAG synthesis	Reactome	R-HSA-1971475	DCN; B3GAT1; BGN	27087; 633; 1634	26	26		1.64045e-07	1.07654e-06	HS-GAG biosynthesis	Reactome	R-HSA-2022928	NDST1; HS3ST1; HS6ST2; EXT1; GLCE	2131; 3340; 90161; 9957; 26035	31	31
Pigyl	current symbol	MGI:1913518	Pigyl	phosphatidylinositol glycan anchor biosynthesis, class Y-like	protein coding gene	ENSMUSG00000010607	66268	P0C1P0	Part of the glycosylphosphatidylinositol-N-acetylglucosaminyltransferase (GPI-GnT) complex that catalyzes the transfer of N-acetylglucosamine from UDP-N-acetylglucosamine to phosphatidylinositol and participates in the first step of GPI biosynthesis. May act by regulating the catalytic subunit PIGA. {ECO:0000250|UniProtKB:Q3MUY2}.	Glycolipid biosynthesis; glycosylphosphatidylinositol-anchor biosynthesis. {ECO:0000250|UniProtKB:Q3MUY2}.	GPI anchor biosynthetic process [GO:0006506]	0	0		1.80868e-05	4.78768e-05	Keratan sulfate biosynthesis	Reactome	R-HSA-2022854	OGN; CHST2; KERA	11081; 4969; 9435	28	28		2.65633e-07	1.64068e-06	Metabolism	Reactome	R-HSA-1430728	UGCG; AGL; HS3ST1; MAN2B1; GNPDA1; IDS; BGN; B3GAT1; DCN; NDST1; SRD5A3; B3GALT5; TPST2; B3GALT1; EXT1; TPST1; GLCE; CHST2; CSGALNACT1; ARSB; MANBA; HEXB; OGN; HS6ST2	8708; 4126; 79644; 2131; 27087; 8459; 3340; 1634; 411; 178; 55790; 10317; 90161; 3074; 8460; 4969; 4125; 7357; 26035; 633; 10007; 9435; 9957; 3423	1954	1952
Pigc	current symbol	MGI:1914542	Pigc	phosphatidylinositol glycan anchor biosynthesis, class C	protein coding gene	ENSMUSG00000026698	67292	Q9CXR4	Part of the glycosylphosphatidylinositol-N-acetylglucosaminyltransferase (GPI-GnT) complex that catalyzes the transfer of N-acetylglucosamine from UDP-N-acetylglucosamine to phosphatidylinositol and participates in the first step of GPI biosynthesis. {ECO:0000250|UniProtKB:Q92535}.	Glycolipid biosynthesis; glycosylphosphatidylinositol-anchor biosynthesis. {ECO:0000250|UniProtKB:Q92535}.	GPI anchor biosynthetic process [GO:0006506]	0	PIGC family		2.23602e-05	5.59006e-05	Proteoglycan biosynthesis	EHMN	Proteoglycan biosynthesis	B3GAT1; EXT1; CHSY1	27087; 2131; 22856	30	30		5.4197e-07	3.16149e-06	Various types of N-glycan biosynthesis - Homo sapiens (human)	KEGG	path:hsa00513	MAN1B1; ALG3; ALG2; HEXB; FUT8	3074; 11253; 10195; 2530; 85365	39	39
Pigx	current symbol	MGI:1919334	Pigx	phosphatidylinositol glycan anchor biosynthesis, class X	protein coding gene	ENSMUSG00000023791	72084	Q99LV7	Essential component of glycosylphosphatidylinositol-mannosyltransferase 1 which transfers the first of the 4 mannoses in the GPI-anchor precursors during GPI-anchor biosynthesis. Probably acts by stabilizing the mannosyltransferase PIGM (By similarity). {ECO:0000250}.	Glycolipid biosynthesis; glycosylphosphatidylinositol-anchor biosynthesis.	GPI anchor biosynthetic process [GO:0006506]	0	PIGX family		4.97792e-05	0.000117898	Various types of N-glycan biosynthesis - Homo sapiens (human)	KEGG	path:hsa00513	MAN1B1; ALG2; HEXB	3074; 11253; 85365	39	39		6.18959e-07	3.42056e-06	Glycosaminoglycan degradation	Wikipathways	WP4815	HEXB; HGSNAT; ARSB; IDS	138050; 3423; 3074; 411	17	17
Mpdu1	current symbol	MGI:1346040	Mpdu1	mannose-P-dolichol utilization defect 1	protein coding gene	ENSMUSG00000018761	24070	Q9R0Q9	Required for normal utilization of mannose-dolichol phosphate (Dol-P-Man) in the synthesis of N-linked and O-linked oligosaccharides and GPI anchors. {ECO:0000250}.	0	oligosaccharide biosynthetic process [GO:0009312]	0	MPDU1 (TC 2.A.43.3) family		7.52778e-05	0.000169375	Integrin	INOH	None	DCN; COL9A2; BGN; KERA	11081; 1634; 1298; 633	124	124		1.00179e-06	5.25939e-06	Glycosaminoglycan degradation - Homo sapiens (human)	KEGG	path:hsa00531	HEXB; HGSNAT; ARSB; IDS	138050; 3074; 411; 3423	19	19
Siglec15	current symbol	MGI:3646642	Siglec15	sialic acid binding Ig-like lectin 15	protein coding gene	ENSMUSG00000091055	620235	A7E1W8	0	0	regulation of actin cytoskeleton organization [GO:0032956]; regulation of bone resorption [GO:0045124]; regulation of osteoclast development [GO:2001204]	0	0		9.31739e-05	0.000199658	Amino sugar and nucleotide sugar metabolism - Homo sapiens (human)	KEGG	path:hsa00520	GNPDA1; HEXB; FPGT	3074; 10007; 8790	48	48		1.56654e-06	7.83269e-06	Amino sugar and nucleotide sugar metabolism - Homo sapiens (human)	KEGG	path:hsa00520	GNPDA1; HEXB; GMPPA; UAP1; FPGT	3074; 10007; 6675; 8790; 29926	48	48
Clec7a	current symbol	MGI:1861431	Clec7a	C-type lectin domain family 7, member a	polymorphic pseudogene	ENSMUSG00000079293	56644	Q6QLQ4	Lectin that functions as pattern recognizing receptor (PRR) specific for beta-1,3-linked and beta-1,6-linked glucans, which constitute cell wall constituents from pathogenic bacteria and fungi (PubMed:11544516, PubMed:17159984, PubMed:15213161). Necessary for the TLR2-mediated inflammatory response and activation of NF-kappa-B: upon beta-glucan binding, recruits SYK via its ITAM motif and promote…	0	antifungal innate immune response [GO:0061760]; cell activation [GO:0001775]; cellular response to molecule of fungal origin [GO:0071226]; detection of fungus [GO:0016046]; detection of molecule of fungal origin [GO:0032491]; detection of yeast [GO:0001879]; inflammatory response [GO:0006954]; innate immune response [GO:0045087]; leukocyte activation involved in immune response [GO:0002366]; phag…	(1->3)-beta-D-glucan binding [GO:0001872]; metal ion binding [GO:0046872]; pattern recognition receptor activity [GO:0038187]	0		0.000147869	0.000302458	ECM proteoglycans	Reactome	R-HSA-3000178	DCN; COL9A2; BGN	633; 1634; 1298	56	56		2.37326e-06	1.13269e-05	CS/DS degradation	Reactome	R-HSA-2024101	HEXB; IDS; ARSB	411; 3423; 3074	7	7
St6galnac4	current symbol	MGI:1341894	St6galnac4	ST6 (alpha-N-acetyl-neuraminyl-2,3-beta-galactosyl-1,3)-N-acetylgalactosaminide alpha-2,6-sialyltransferase 4	protein coding gene	ENSMUSG00000079442	20448	Q9R2B6	Transfers the sialyl group (N-acetyl-alpha-neuraminyl or NeuAc) from CMP-NeuAc to the GalNAc residue on the NeuAc-alpha-2,3-Gal-beta-1,3-GalNAc sequence of glycoproteins and glycolipids forming an alpha-2,6-linkage. Produces branched type disialyl structures by transfer of a sialyl group onto a GalNAc residue inside the backbone core chains (PubMed:10207017, PubMed:10601645). Prefers O-glycans to…	Protein modification; protein glycosylation. {ECO:0000305|PubMed:10207017, ECO:0000305|PubMed:10601645}.; Glycolipid biosynthesis. {ECO:0000305|PubMed:10207017, ECO:0000305|PubMed:10601645}.	ganglioside biosynthetic process [GO:0001574]; oligosaccharide metabolic process [GO:0009311]; protein glycosylation [GO:0006486]	(alpha-N-acetylneuraminyl-2,3-beta-galactosyl-1,3)-N-acetyl-galactosaminide 6-alpha-sialyltransferase activity [GO:0047290]; alpha-N-acetylgalactosaminide alpha-2,6-sialyltransferase activity [GO:0001665]	Glycosyltransferase 29 family		0.000180998	0.000354126	Dermatan sulfate biosynthesis	Reactome	R-HSA-2022923	DCN; BGN	633; 1634	11	11		7.72335e-06	3.52588e-05	O-linked glycosylation of mucins	Reactome	R-HSA-913709	B3GNTL1; GCNT1; B3GNT9; GALNT2; ST6GAL1	2650; 2590; 84752; 146712; 6480	66	66
St6galnac3	current symbol	MGI:1341828	St6galnac3	ST6 (alpha-N-acetyl-neuraminyl-2,3-beta-galactosyl-1,3)-N-acetylgalactosaminide alpha-2,6-sialyltransferase 3	protein coding gene	ENSMUSG00000052544	20447	Q9WUV2	Transfers the sialyl group (N-acetyl-alpha-neuraminyl or NeuAc) from CMP-NeuAc to the GalNAc residue on the NeuAc-alpha-2,3-Gal-beta-1,3-GalNAc sequence of glycoproteins and glycolipids forming an alpha-2,6-linkage. Produces branched type disialyl structures by transfer of a sialyl group onto a GalNAc residue inside the backbone core chains. ST6GalNAcIII prefers glycolipids to glycoproteins, pred…	Protein modification; protein glycosylation. {ECO:0000305|PubMed:10207017, ECO:0000305|PubMed:10601645}.; Glycolipid biosynthesis. {ECO:0000305|PubMed:10207017, ECO:0000305|PubMed:10601645}.	ganglioside biosynthetic process [GO:0001574]; glycoprotein metabolic process [GO:0009100]; glycosphingolipid metabolic process [GO:0006687]; glycosylceramide metabolic process [GO:0006677]; oligosaccharide metabolic process [GO:0009311]; protein glycosylation [GO:0006486]	(alpha-N-acetylneuraminyl-2,3-beta-galactosyl-1,3)-N-acetyl-galactosaminide 6-alpha-sialyltransferase activity [GO:0047290]; alpha-N-acetylgalactosaminide alpha-2,6-sialyltransferase activity [GO:0001665]; sialyltransferase activity [GO:0008373]	Glycosyltransferase 29 family		0.000256102	0.000480192	chondroitin sulfate biosynthesis (late stages)	HumanCyc	PWY-6567	CHST2; CHSY1	9435; 22856	13	13		8.06492e-06	3.5284e-05	dolichyl-diphosphooligosaccharide biosynthesis	HumanCyc	MANNOSYL-CHITO-DOLICHOL-BIOSYNTHESIS	ALG3; ALG8; ALG6	79053; 10195; 29929	10	10
B4galnt1	current symbol	MGI:1342057	B4galnt1	beta-1,4-N-acetyl-galactosaminyl transferase 1	protein coding gene	ENSMUSG00000006731	14421	Q09200	Involved in the biosynthesis of gangliosides GM2, GD2 and GA2. {ECO:0000269|PubMed:8855236}.; Involved in the biosynthesis of gangliosides GM2, GD2, GT2 and GA2 from GM3, GD3, GT3 and GA3, respectively. {ECO:0000250|UniProtKB:Q10468}.	Sphingolipid metabolism. {ECO:0000269|PubMed:8855236}.	ganglioside biosynthetic process [GO:0001574]; glycosphingolipid biosynthetic process [GO:0006688]; glycosphingolipid metabolic process [GO:0006687]; lipid glycosylation [GO:0030259]; lipid storage [GO:0019915]; spermatogenesis [GO:0007283]	(N-acetylneuraminyl)-galactosylglucosylceramide N-acetylgalactosaminyltransferase activity [GO:0003947]; acetylgalactosaminyltransferase activity [GO:0008376]	Glycosyltransferase 2 family		0.000358429	0.000645173	Metapathway biotransformation Phase I and II	Wikipathways	WP702	NDST1; CHST2; UGT2A1; HS6ST2	90161; 9435; 3340; 10941	186	186		1.46217e-05	6.14113e-05	Lysosome - Homo sapiens (human)	KEGG	path:hsa04142	MANBA; ARSB; MAN2B1; HEXB; IDS; HGSNAT	3074; 4125; 4126; 138050; 3423; 411	128	128
Hs3st3a1	current symbol	MGI:1333861	Hs3st3a1	heparan sulfate (glucosamine) 3-O-sulfotransferase 3A1	protein coding gene	ENSMUSG00000047759	15478	Q8BKN6	Sulfotransferase that utilizes 3'-phospho-5'-adenylyl sulfate (PAPS) to catalyze the transfer of a sulfo group to an N-unsubstituted glucosamine linked to a 2-O-sulfo iduronic acid unit on heparan sulfate. Catalyzes the O-sulfation of glucosamine in IdoUA2S-GlcNS and also in IdoUA2S-GlcNH2. Unlike 3-OST-1, does not convert non-anticoagulant heparan sulfate to anticoagulant heparan sulfate (By sim…	0	0	[heparan sulfate]-glucosamine 3-sulfotransferase 1 activity [GO:0008467]	Sulfotransferase 1 family		0.000444504	0.000769334	dermatan sulfate biosynthesis	HumanCyc	PWY-6571	B3GAT1; CHSY1	27087; 22856	17	17		2.69405e-05	0.000108798	N-Glycan biosynthesis	EHMN	N-Glycan biosynthesis	MAN1B1; ALG3; ST6GAL1; FUT8	11253; 10195; 2530; 6480	42	42
Hs3st1	current symbol	MGI:1201606	Hs3st1	heparan sulfate (glucosamine) 3-O-sulfotransferase 1	protein coding gene	ENSMUSG00000051022	15476	O35310	Sulfotransferase that utilizes 3'-phospho-5'-adenylyl sulfate (PAPS) to catalyze the transfer of a sulfo group to position 3 of glucosamine residues in heparan. Catalyzes the rate limiting step in the biosynthesis of heparan sulfate (HSact). This modification is a crucial step in the biosynthesis of anticoagulant heparan sulfate as it completes the structure of the antithrombin pentasaccharide bi…	0	0	[heparan sulfate]-glucosamine 3-sulfotransferase 1 activity [GO:0008467]	Sulfotransferase 1 family		0.000499497	0.000832495	Proteoglycan biosynthesis	Wikipathways	WP4784	EXT1; CHSY1	22856; 2131	18	18		3.01302e-05	0.000117173	Glycosphingolipid biosynthesis - ganglio series - Homo sapiens (human)	KEGG	path:hsa00604	ST8SIA5; HEXB; ST6GALNAC5	3074; 29906; 81849	15	15
Hs3st4	current symbol	MGI:1333792	Hs3st4	heparan sulfate (glucosamine) 3-O-sulfotransferase 4	protein coding gene	ENSMUSG00000078591	628779	D3YVV6	0	0	0	[heparan sulfate]-glucosamine 3-sulfotransferase 1 activity [GO:0008467]	Sulfotransferase 1 family		0.000697791	0.00112145	Post-translational protein modification	Reactome	R-HSA-597592	TPST2; GALNT13; PRKCSH; ALG2; ALG6; B3GNT8; MAN1B1; FPGT; SRD5A3	29929; 79644; 374907; 11253; 8459; 8790; 85365; 5589; 114805	1425	1425		5.10656e-05	0.000187454	dolichol and dolichyl phosphate biosynthesis	HumanCyc	PWY-6129	SRD5A3; DOLK	79644; 22845	3	3
Hs3st6	current symbol	MGI:3580487	Hs3st6	heparan sulfate (glucosamine) 3-O-sulfotransferase 6	protein coding gene	ENSMUSG00000039628	328779	Q5GFD5	Sulfotransferase that utilizes 3'-phospho-5'-adenylyl sulfate (PAPS) to catalyze the transfer of a sulfo group to heparan sulfate. Unlike 3-OST-1, does not convert non-anticoagulant heparan sulfate to anticoagulant heparan sulfate.	0	blastocyst hatching [GO:0001835]	[heparan sulfate]-glucosamine 3-sulfotransferase 1 activity [GO:0008467]	Sulfotransferase 1 family		0.000821269	0.00127438	Mannose type O-glycan biosynthesis - Homo sapiens (human)	KEGG	path:hsa00515	B3GAT1; MGAT5B	27087; 146664	23	23		5.35582e-05	0.000187454	Other glycan degradation - Homo sapiens (human)	KEGG	path:hsa00511	HEXB; MANBA; MAN2B1	3074; 4125; 4126	18	18
Hs3st5	current symbol	MGI:2441996	Hs3st5	heparan sulfate (glucosamine) 3-O-sulfotransferase 5	protein coding gene	ENSMUSG00000044499	319415	Q8BSL4	Sulfotransferase that utilizes 3'-phospho-5'-adenylyl sulfate (PAPS) to catalyze the transfer of a sulfo group to position 3 of glucosamine residues in heparan. Catalyzes the rate limiting step in the biosynthesis of heparan sulfate (HSact). This modification is a crucial step in the biosynthesis of anticoagulant heparan sulfate as it completes the structure of the antithrombin pentasaccharide bi…	0	heparan sulfate proteoglycan biosynthetic process, enzymatic modification [GO:0015015]; negative regulation of coagulation [GO:0050819]; protein sulfation [GO:0006477]; regulation of viral entry into host cell [GO:0046596]	[heparan sulfate]-glucosamine 3-sulfotransferase 1 activity [GO:0008467]	Sulfotransferase 1 family		0.000894909	0.00134236	Calnexin/calreticulin cycle	Reactome	R-HSA-901042	MAN1B1; PRKCSH	11253; 5589	24	24		5.35582e-05	0.000187454	Synthesis of glycosylphosphatidylinositol (GPI)	Reactome	R-HSA-162710	PIGP; PIGQ; PIGA	9091; 51227; 5277	18	18
Hs3st2	current symbol	MGI:1333802	Hs3st2	heparan sulfate (glucosamine) 3-O-sulfotransferase 2	protein coding gene	ENSMUSG00000046321	195646	Q673U1	Sulfotransferase that utilizes 3'-phospho-5'-adenylyl sulfate (PAPS) to catalyze the transfer of a sulfo group to an N-unsubstituted glucosamine linked to a 2-O-sulfo iduronic acid unit on heparan sulfate. Catalyzes the O-sulfation of glucosamine in GlcA2S-GlcNS. Unlike 3-OST-1, does not convert non-anticoagulant heparan sulfate to anticoagulant heparan sulfate (By similarity). {ECO:0000250}.	0	circadian rhythm [GO:0007623]	[heparan sulfate]-glucosamine 3-sulfotransferase 1 activity [GO:0008467]; [heparan sulfate]-glucosamine 3-sulfotransferase 2 activity [GO:0033871]	Sulfotransferase 1 family		0.00140084	0.00203348	Fructose Mannose metabolism	INOH	None	GNPDA1; FPGT	8790; 10007	30	30		7.43827e-05	0.000251941	Chondroitin sulfate biosynthesis	Reactome	R-HSA-2022870	DCN; BGN; CSGALNACT1	55790; 633; 1634	20	20
Hs3st3b1	current symbol	MGI:1333853	Hs3st3b1	heparan sulfate (glucosamine) 3-O-sulfotransferase 3B1	protein coding gene	ENSMUSG00000070407	54710	Q9QZS6	Sulfotransferase that utilizes 3'-phospho-5'-adenylyl sulfate (PAPS) to catalyze the transfer of a sulfo group to an N-unsubstituted glucosamine linked to a 2-O-sulfo iduronic acid unit on heparan sulfate. Catalyzes the O-sulfation of glucosamine in IdoUA2S-GlcNS and also in IdoUA2S-GlcNH2. Unlike 3-OST-1, does not convert non-anticoagulant heparan sulfate to anticoagulant heparan sulfate (By sim…	0	protein sulfation [GO:0006477]	[heparan sulfate]-glucosamine 3-sulfotransferase 1 activity [GO:0008467]; [heparan sulfate]-glucosamine 3-sulfotransferase 3 activity [GO:0033872]	Sulfotransferase 1 family		0.00169453	0.00238293	N-glycan trimming in the ER and Calnexin/Calreticulin cycle	Reactome	R-HSA-532668	MAN1B1; PRKCSH	11253; 5589	33	33		8.65236e-05	0.000283905	chondroitin sulfate biosynthesis	HumanCyc	PWY-6569	B3GAT1; CHST2; CSGALNACT1	55790; 27087; 9435	21	21
Ndst1	current symbol	MGI:104719	Ndst1	N-deacetylase/N-sulfotransferase (heparan glucosaminyl) 1	protein coding gene	ENSMUSG00000054008	15531	Q3UHN9	Essential bifunctional enzyme that catalyzes both the N-deacetylation and the N-sulfation of glucosamine (GlcNAc) of the glycosaminoglycan in heparan sulfate. Modifies the GlcNAc-GlcA disaccharide repeating sugar backbone to make N-sulfated heparosan, a prerequisite substrate for later modifications in heparin biosynthesis. Plays a role in determining the extent and pattern of sulfation of hepara…	Glycan metabolism; heparan sulfate biosynthesis.; Glycan metabolism; heparin biosynthesis.	animal organ morphogenesis [GO:0009887]; aorta development [GO:0035904]; cardiac septum development [GO:0003279]; cell population proliferation [GO:0008283]; coronary vasculature development [GO:0060976]; embryonic neurocranium morphogenesis [GO:0048702]; embryonic viscerocranium morphogenesis [GO:0048703]; fibroblast growth factor receptor signaling pathway [GO:0008543]; forebrain development [G…	[heparan sulfate]-glucosamine N-sulfotransferase activity [GO:0015016]; deacetylase activity [GO:0019213]; heparan sulfate N-deacetylase activity [GO:0102140]; sulfotransferase activity [GO:0008146]	Sulfotransferase 1 family, NDST subfamily		0.00568895	0.00775765	Steroid hormone biosynthesis - Homo sapiens (human)	KEGG	path:hsa00140	SRD5A3; UGT2A1	79644; 10941	61	61		0.000101857	0.000324092	Lysosomal oligosaccharide catabolism	Reactome	R-HSA-8853383	MANBA; MAN2B1	4126; 4125	4	4
Ndst3	current symbol	MGI:1932544	Ndst3	N-deacetylase/N-sulfotransferase (heparan glucosaminyl) 3	protein coding gene	ENSMUSG00000027977	83398	Q9EQH7	Essential bifunctional enzyme that catalyzes both the N-deacetylation and the N-sulfation of glucosamine (GlcNAc) of the glycosaminoglycan in heparan sulfate. Modifies the GlcNAc-GlcA disaccharide repeating sugar backbone to make N-sulfated heparosan, a prerequisite substrate for later modifications in heparin biosynthesis. Has high deacetylase activity but low sulfotransferase activity. {ECO:000…	Glycan metabolism; heparan sulfate biosynthesis.; Glycan metabolism; heparin biosynthesis.	heparan sulfate proteoglycan biosynthetic process [GO:0015012]; heparan sulfate proteoglycan biosynthetic process, polysaccharide chain biosynthetic process [GO:0015014]; heparin biosynthetic process [GO:0030210]	[heparan sulfate]-glucosamine N-sulfotransferase activity [GO:0015016]; deacetylase activity [GO:0019213]; heparan sulfate N-deacetylase activity [GO:0102140]; sulfotransferase activity [GO:0008146]	Sulfotransferase 1 family, NDST subfamily		0.00602265	0.00778826	Metabolism of proteins	Reactome	R-HSA-392499	TPST2; GALNT13; PRKCSH; ALG2; ALG6; B3GNT8; MAN1B1; FPGT; SRD5A3	29929; 79644; 374907; 11253; 8790; 85365; 5589; 114805; 8459	1935	1934		0.0001136	0.000350824	O-linked glycosylation	Reactome	R-HSA-5173105	GCNT1; B3GNTL1; B3GNT9; GALNT2; ST6GAL1	6480; 2590; 146712; 84752; 2650	115	115
Ndst2	current symbol	MGI:97040	Ndst2	N-deacetylase/N-sulfotransferase (heparan glucosaminyl) 2	protein coding gene	ENSMUSG00000039308	17423	P52850	Essential bifunctional enzyme that catalyzes both the N-deacetylation and the N-sulfation of glucosamine (GlcNAc) of the glycosaminoglycan in heparan sulfate. Modifies the GlcNAc-GlcA disaccharide repeating sugar backbone to make N-sulfated heparosan, a prerequisite substrate for later modifications in heparin biosynthesis. Plays a role in determining the extent and pattern of sulfation of hepara…	Glycan metabolism; heparan sulfate biosynthesis.; Glycan metabolism; heparin biosynthesis.	cellular process [GO:0009987]; glycosaminoglycan biosynthetic process [GO:0006024]; heparan sulfate proteoglycan biosynthetic process [GO:0015012]; heparan sulfate proteoglycan biosynthetic process, polysaccharide chain biosynthetic process [GO:0015014]; heparin biosynthetic process [GO:0030210]; regulation of angiotensin levels in blood [GO:0002002]	[heparan sulfate]-glucosamine N-sulfotransferase activity [GO:0015016]; deacetylase activity [GO:0019213]; sulfotransferase activity [GO:0008146]	Sulfotransferase 1 family, NDST subfamily		0.00605754	0.00778826	Synthesis of substrates in N-glycan biosythesis	Reactome	R-HSA-446219	SRD5A3; FPGT	8790; 79644	63	63		0.000130509	0.000391528	Calnexin/calreticulin cycle	Reactome	R-HSA-901042	MAN1B1; OS9; PRKCSH	11253; 5589; 10956	24	24
Ndst4	current symbol	MGI:1932545	Ndst4	N-deacetylase/N-sulfotransferase (heparin glucosaminyl) 4	protein coding gene	ENSMUSG00000027971	64580	Q9EQW8	Essential bifunctional enzyme that catalyzes both the N-deacetylation and the N-sulfation of glucosamine (GlcNAc) of the glycosaminoglycan in heparan sulfate. Modifies the GlcNAc-GlcA disaccharide repeating sugar backbone to make N-sulfated heparosan, a prerequisite substrate for later modifications in heparin biosynthesis. Has low deacetylase activity but high sulfotransferase activity. {ECO:000…	Glycan metabolism; heparan sulfate biosynthesis.; Glycan metabolism; heparin biosynthesis.	heparan sulfate proteoglycan biosynthetic process, polysaccharide chain biosynthetic process [GO:0015014]; heparin biosynthetic process [GO:0030210]	[heparan sulfate]-glucosamine N-sulfotransferase activity [GO:0015016]; deacetylase activity [GO:0019213]; sulfotransferase activity [GO:0008146]	Sulfotransferase 1 family, NDST subfamily		0.00663042	0.00828803	O-linked glycosylation of mucins	Reactome	R-HSA-913709	B3GNT8; GALNT13	114805; 374907	66	66		0.000166663	0.000472961	Glycosylphosphatidylinositol (GPI)-anchor biosynthesis - Homo sapiens (human)	KEGG	path:hsa00563	PIGP; PIGQ; PIGA	9091; 51227; 5277	26	26
Oga	current symbol	MGI:1932139	Oga	O-GlcNAcase	protein coding gene	ENSMUSG00000025220	76055	Q9EQQ9	Cleaves GlcNAc but not GalNAc from O-glycosylated proteins. Can use p-nitrophenyl-beta-GlcNAc and 4-methylumbelliferone-GlcNAc as substrates but not p-nitrophenyl-beta-GalNAc or p-nitrophenyl-alpha-GlcNAc (in vitro) (PubMed:16517082). Does not bind acetyl-CoA and does not have histone acetyltransferase activity. {ECO:0000250|UniProtKB:O60502, ECO:0000269|PubMed:16517082}.	0	dATP metabolic process [GO:0046060]; glycoprotein metabolic process [GO:0009100]; N-acetylglucosamine metabolic process [GO:0006044]; necrotic cell death [GO:0070265]; negative regulation of cardiac muscle adaptation [GO:0010616]; negative regulation of protein glycosylation [GO:0060051]; positive regulation of calcium ion transport [GO:0051928]; positive regulation of calcium ion transport into …	[protein]-3-O-(N-acetyl-D-glucosaminyl)-L-serine/L-threonine O-N-acetyl-alpha-D-glucosaminase activity [GO:0102571]; [protein]-3-O-(N-acetyl-D-glucosaminyl)-L-serine O-N-acetyl-alpha-D-glucosaminase activity [GO:0102167]; [protein]-3-O-(N-acetyl-D-glucosaminyl)-L-threonine O-N-acetyl-alpha-D-glucosaminase activity [GO:0102166]; beta-N-acetylglucosaminidase activity [GO:0016231]; histone acetyltra…	Glycosyl hydrolase 84 family												0.000166663	0.000472961	A tetrasaccharide linker sequence is required for GAG synthesis	Reactome	R-HSA-1971475	DCN; B3GAT1; BGN	27087; 633; 1634	26	26
Ugt8a	current symbol	MGI:109522	Ugt8a	UDP galactosyltransferase 8A	protein coding gene	ENSMUSG00000032854	22239	Q64676	Catalyzes the transfer of galactose to ceramide, a key enzymatic step in the biosynthesis of galactocerebrosides, which are abundant sphingolipids of the myelin membrane of the central nervous system and peripheral nervous system. Galactosylates both hydroxy- and non-hydroxy fatty acid-containing ceramides and diglycerides. {ECO:0000250|UniProtKB:Q09426}.	Sphingolipid metabolism; galactosylceramide biosynthesis. {ECO:0000250|UniProtKB:Q09426}.	cytoskeleton organization [GO:0007010]; galactosylceramide biosynthetic process [GO:0006682]; glycolipid biosynthetic process [GO:0009247]; myelination [GO:0042552]; neuron projection morphogenesis [GO:0048812]; paranodal junction assembly [GO:0030913]; protein localization to paranode region of axon [GO:0002175]	2-hydroxyacylsphingosine 1-beta-galactosyltransferase activity [GO:0003851]; ceramide glucosyltransferase activity [GO:0008120]; N-acylsphingosine galactosyltransferase activity [GO:0047263]; UDP-galactose:glucosylceramide beta-1,4-galactosyltransferase activity [GO:0008489]	UDP-glycosyltransferase family		Ketamine Treatment - Striatal Tissue-4hr										0.000253281	0.000692443	Synthesis of Dolichyl-phosphate	Reactome	R-HSA-446199	SRD5A3; DOLK	79644; 22845	6	6
Srd5a3	current symbol	MGI:1930252	Srd5a3	steroid 5 alpha-reductase 3	protein coding gene	ENSMUSG00000029233	57357	Q9WUP4	Plays a key role in early steps of protein N-linked glycosylation by being required for the conversion of polyprenol into dolichol. Dolichols are required for the synthesis of dolichol-linked monosaccharides and the oligosaccharide precursor used for N-glycosylation. Acts as a polyprenol reductase that promotes the reduction of the alpha-isoprene unit of polyprenols into dolichols in a NADP-depen…	Protein modification; protein glycosylation. {ECO:0000269|PubMed:20637498}.	dolichol biosynthetic process [GO:0019408]; dolichol-linked oligosaccharide biosynthetic process [GO:0006488]; dolichol metabolic process [GO:0019348]; polyprenol catabolic process [GO:0016095]	3-oxo-5-alpha-steroid 4-dehydrogenase activity [GO:0003865]; cholestenone 5-alpha-reductase activity [GO:0047751]; oxidoreductase activity, acting on the CH-CH group of donors, NAD or NADP as acceptor [GO:0016628]; polyprenol reductase activity [GO:0102389]	Steroid 5-alpha reductase family, Polyprenol reductase subfamily		p-value	q-value	pathway	source	external_id	members_input_overlap	members_input_overlap_geneids	size	effective_size		0.000257193	0.000692443	Fructose Mannose metabolism	INOH	None	GNPDA1; FPGT; GMPPA	29926; 8790; 10007	30	30
Chst15	current symbol	MGI:1924840	Chst15	carbohydrate sulfotransferase 15	protein coding gene	ENSMUSG00000030930	77590	Q91XQ5	Sulfotransferase that transfers sulfate from 3'-phosphoadenosine 5'-phosphosulfate (PAPS) to the C-6 hydroxyl group of the GalNAc 4-sulfate residue of chondroitin sulfate A and forms chondroitin sulfate E containing GlcA-GalNAc(4,6-SO(4)) repeating units. It also transfers sulfate to a unique non-reducing terminal sequence, GalNAc(4SO4)-GlcA(2SO4)-GalNAc(6SO4), to yield a highly sulfated structur…	0	hexose biosynthetic process [GO:0019319]	3'-phosphoadenosine 5'-phosphosulfate binding [GO:0050656]; N-acetylgalactosamine 4-sulfate 6-O-sulfotransferase activity [GO:0050659]	Sulfotransferase 1 family		7.36042e-10	3.60661e-08	Metabolism of carbohydrates	Reactome	R-HSA-71387	NAGLU; HK1; IDS; PGM2; SLC35B2; FUT1; B3GAT1; CHST5; KERA	55276; 23563; 4669; 11081; 27087; 3098; 347734; 2523; 3423	285	284		0.00034258	0.000843925	Keratan sulfate/keratin metabolism	Reactome	R-HSA-1638074	HEXB; CHST2; OGN	3074; 4969; 9435	33	33
Slc35b3	current symbol	MGI:1913978	Slc35b3	solute carrier family 35, member B3	protein coding gene	ENSMUSG00000021432	108652	Q922Q5	Mediates the transport of adenosine 3'-phospho 5'-phosphosulfate (PAPS), from cytosol into Golgi. PAPS is a universal sulfuryl donor for sulfation events that take place in the Golgi. Compensates for the insufficient expression of SLC35B2/PAPST1 during the synthesis of sulfated glycoconjugates in the colon (By similarity). {ECO:0000250}.	0	0	3'-phosphoadenosine 5'-phosphosulfate transmembrane transporter activity [GO:0046964]; transmembrane transporter activity [GO:0022857]	Nucleotide-sugar transporter family, SLC35B subfamily		1.61409e-09	3.95452e-08	Fructose Mannose metabolism	INOH	None	GFPT2; HK1; GMPPA; PGM2; MPI	3098; 55276; 29926; 4351; 9945	30	30		0.00034258	0.000843925	N-glycan trimming in the ER and Calnexin/Calreticulin cycle	Reactome	R-HSA-532668	MAN1B1; OS9; PRKCSH	11253; 5589; 10956	33	33
Slc35b2	current symbol	MGI:1921086	Slc35b2	solute carrier family 35, member B2	protein coding gene	ENSMUSG00000037089	73836	Q91ZN5	Mediates the transport of adenosine 3'-phospho 5'-phosphosulfate (PAPS), from cytosol into Golgi. PAPS is a universal sulfuryl donor for sulfation events that take place in the Golgi (By similarity). {ECO:0000250}.	0	3'-phosphoadenosine 5'-phosphosulfate transport [GO:0046963]	3'-phosphoadenosine 5'-phosphosulfate transmembrane transporter activity [GO:0046964]; transmembrane transporter activity [GO:0022857]	Nucleotide-sugar transporter family, SLC35B subfamily		1.89864e-08	2.36257e-07	Amino sugar and nucleotide sugar metabolism - Homo sapiens (human)	KEGG	path:hsa00520	GFPT2; HK1; GMPPA; PGM2; MPI	3098; 9945; 29926; 55276; 4351	48	48		0.00034258	0.000843925	Sialic acid metabolism	Reactome	R-HSA-4085001	ST8SIA5; ST6GALNAC5; ST6GAL1	29906; 81849; 6480	33	33
Agl	current symbol	MGI:1924809	Agl	amylo-1,6-glucosidase, 4-alpha-glucanotransferase	protein coding gene	ENSMUSG00000033400	77559	A0A0G2JGI9	Multifunctional enzyme acting as 1,4-alpha-D-glucan:1,4-alpha-D-glucan 4-alpha-D-glycosyltransferase and amylo-1,6-glucosidase in glycogen degradation. {ECO:0000256|ARBA:ARBA00003530}.	0	glycogen biosynthetic process [GO:0005978]; glycogen catabolic process [GO:0005980]; glycogen metabolic process [GO:0005977]; response to glucocorticoid [GO:0051384]; response to hormone [GO:0009725]; response to nutrient [GO:0007584]	4-alpha-glucanotransferase activity [GO:0004134]; amylo-alpha-1,6-glucosidase activity [GO:0004135]; beta-maltose 4-alpha-glucanotransferase activity [GO:0102500]; carbohydrate binding [GO:0030246]; glycogen debranching enzyme activity [GO:0004133]; polysaccharide binding [GO:0030247]; polyubiquitin modification-dependent protein binding [GO:0031593]	0		1.92863e-08	2.36257e-07	Asparagine N-linked glycosylation	Reactome	R-HSA-446203	ALG3; CALR; GMPPA; MPI; MGAT2; EDEM2; GFPT2; DPM2	8818; 10195; 55741; 29926; 9945; 4247; 4351; 811	283	283		0.000353645	0.000843925	chondroitin sulfate degradation (metazoa)	HumanCyc	PWY-6573	HEXB; ARSB	411; 3074	7	7
Fut9	current symbol	MGI:1330859	Fut9	fucosyltransferase 9	protein coding gene	ENSMUSG00000055373	14348	O88819	Catalyzes the transfer of L-fucose, from a guanosine diphosphate-beta-L-fucose, to the N-acetyl glucosamine (GlcNAc) of a distal lactosamine unit of a glycoprotein or a glycolipid-linked polylactosamine chains through an alpha-1,3 glycosidic linkage and participates in particular to the Lewis x (Lex)/CD15 epitope biosynthesis in neurons which allows cell differentiation, cell adhesion, and initia…	Protein modification; protein glycosylation.	cellular polysaccharide biosynthetic process [GO:0033692]; fucosylation [GO:0036065]; nervous system development [GO:0007399]; neuron differentiation [GO:0030182]; positive regulation of neuron projection development [GO:0010976]; protein glycosylation [GO:0006486]; regulation of leukocyte cell-cell adhesion [GO:1903037]; regulation of leukocyte tethering or rolling [GO:1903236]	4-galactosyl-N-acetylglucosaminide 3-alpha-L-fucosyltransferase activity [GO:0017083]; alpha-(1->3)-fucosyltransferase activity [GO:0046920]	Glycosyltransferase 10 family		5.02819e-08	4.92763e-07	Glycosaminoglycan metabolism	Reactome	R-HSA-1630316	NAGLU; IDS; SLC35B2; B3GAT1; CHST5; KERA	23563; 347734; 4669; 27087; 11081; 3423	119	119		0.000353645	0.000843925	dermatan sulfate degradation (metazoa)	HumanCyc	PWY-6576	HEXB; IDS	3423; 3074	7	7
Fut4	current symbol	MGI:95594	Fut4	fucosyltransferase 4	protein coding gene	ENSMUSG00000049307	14345	Q11127	May catalyze alpha-1,3 glycosidic linkages involved in the expression of Lewis X/SSEA-1 and VIM-2 antigens.	Protein modification; protein glycosylation.	fucosylation [GO:0036065]; oligosaccharide metabolic process [GO:0009311]; positive regulation of leukocyte tethering or rolling [GO:1903238]; protein glycosylation [GO:0006486]; regulation of leukocyte cell-cell adhesion [GO:1903037]	4-galactosyl-N-acetylglucosaminide 3-alpha-L-fucosyltransferase activity [GO:0017083]; alpha-(1->3)-fucosyltransferase activity [GO:0046920]	Glycosyltransferase 10 family		2.11699e-07	1.72887e-06	Biosynthesis of the N-glycan precursor (dolichol lipid-linked oligosaccharide, LLO) and transfer to a nascent protein	Reactome	R-HSA-446193	ALG3; GFPT2; GMPPA; DPM2; MPI	10195; 29926; 8818; 4351; 9945	77	77		0.000603008	0.00140702	UDP-<i>N</i>-acetyl-D-galactosamine biosynthesis II	HumanCyc	PWY-5514	GNPDA1; UAP1	10007; 6675	9	9
Fut7	current symbol	MGI:107692	Fut7	fucosyltransferase 7	protein coding gene	ENSMUSG00000036587	14347	Q11131	Catalyzes the transfer of L-fucose, from a guanosine diphosphate-beta-L-fucose, to the N-acetyl glucosamine (GlcNAc) of a distal alpha2,3 sialylated lactosamine unit of a glycoprotein or a glycolipid-linked sialopolylactosamines chain through an alpha-1,3 glycosidic linkage and participates in the final fucosylation step in the biosynthesis of the sialyl Lewis X (sLe(x)), a carbohydrate involved …	Protein modification; protein glycosylation. {ECO:0000250|UniProtKB:Q11130}.	CD4-positive, CD25-positive, alpha-beta regulatory T cell differentiation [GO:0002361]; ceramide metabolic process [GO:0006672]; embryo implantation [GO:0007566]; fucosylation [GO:0036065]; inflammatory response [GO:0006954]; leukocyte migration involved in immune response [GO:0002522]; leukocyte migration involved in inflammatory response [GO:0002523]; lymphocyte migration into lymphoid organs […	4-galactosyl-N-acetylglucosaminide 3-alpha-L-fucosyltransferase activity [GO:0017083]; alpha-(1->3)-fucosyltransferase activity [GO:0046920]; fucosyltransferase activity [GO:0008417]	Glycosyltransferase 10 family		4.34911e-06	3.04438e-05	Synthesis of substrates in N-glycan biosythesis	Reactome	R-HSA-446219	GFPT2; GMPPA; DPM2; MPI	9945; 29926; 8818; 4351	63	63		0.000653725	0.0014922	Gamma carboxylation, hypusine formation and arylsulfatase activation	Reactome	R-HSA-163841	TPST2; ARSB; TPST1	8460; 8459; 411	41	41
Agrn	current symbol	MGI:87961	Agrn	agrin	protein coding gene	ENSMUSG00000041936	11603	A2ASQ1	[Isoform 1]: heparan sulfate basal lamina glycoprotein that plays a central role in the formation and the maintenance of the neuromuscular junction (NMJ) and directs key events in postsynaptic differentiation. This neuron-specific (z+) isoform is a component of the AGRN-LRP4 receptor complex that induces the phosphorylation and activation of MUSK. The activation of MUSK in myotubes induces the fo…	0	animal organ morphogenesis [GO:0009887]; cell differentiation [GO:0030154]; chemical synaptic transmission [GO:0007268]; negative regulation of P-type sodium:potassium-exchanging transporter activity [GO:1903407]; negative regulation of sodium ion export across plasma membrane [GO:1903277]; neuromuscular junction development [GO:0007528]; neurotransmitter receptor metabolic process [GO:0045213]; …	acetylcholine receptor regulator activity [GO:0030548]; ATPase inhibitor activity [GO:0042030]; BMP binding [GO:0036122]; calcium ion binding [GO:0005509]; chondroitin sulfate binding [GO:0035374]; dystroglycan binding [GO:0002162]; heparan sulfate proteoglycan binding [GO:0043395]; sialic acid binding [GO:0033691]; transforming growth factor beta binding [GO:0050431]; transmembrane transporter b…	0		5.59869e-06	3.42919e-05	Aminosugars metabolism	INOH	None	GFPT2; HK1; MPI	3098; 9945; 4351	20	20		0.000916341	0.00200659	Dermatan sulfate biosynthesis	Reactome	R-HSA-2022923	DCN; BGN	633; 1634	11	11
Gcnt3	current symbol	MGI:1919327	Gcnt3	glucosaminyl (N-acetyl) transferase 3, mucin type	protein coding gene	ENSMUSG00000032226	72077	Q5JCT0	Glycosyltransferase that can synthesize all known mucin beta 6 N-acetylglucosaminides. Mediates core 2 and core 4 O-glycan branching, 2 important steps in mucin-type biosynthesis. Has also I-branching enzyme activity by converting linear into branched poly-N-acetyllactosaminoglycans, leading to introduce the blood group I antigen during embryonic development. {ECO:0000250|UniProtKB:O95395}.	Protein modification; protein glycosylation.	intestinal absorption [GO:0050892]; kidney morphogenesis [GO:0060993]; protein O-linked glycosylation [GO:0006493]; tissue morphogenesis [GO:0048729]	acetylgalactosaminyl-O-glycosyl-glycoprotein beta-1,6-N-acetylglucosaminyltransferase activity [GO:0047225]; acetylgalactosaminyl-O-glycosyl-seryl-glycoprotein beta-1,6-N-acetylglucosaminyltransferase activity [GO:0106325]; acetylgalactosaminyl-O-glycosyl-threonyl-glycoprotein beta-1,6-N-acetylglucosaminyltransferase activity [GO:0106326]; acetylglucosaminyltransferase activity [GO:0008375]; beta…	Glycosyltransferase 14 family		1.26794e-05	6.90322e-05	Glucuronidation	Wikipathways	WP698	HK1; PGM2; UGT1A10	54575; 55276; 3098	26	26		0.000917298	0.00200659	Glycosphingolipid metabolism	Reactome	R-HSA-1660662	UGCG; HEXB; ARSB	3074; 7357; 411	46	46
B3gnt6	current symbol	MGI:3039603	B3gnt6	UDP-GlcNAc:betaGal beta-1,3-N-acetylglucosaminyltransferase 6 (core 3 synthase)	protein coding gene	ENSMUSG00000074004	272411	Q3USF0	Beta-1,3-N-acetylglucosaminyltransferase that synthesizes the core 3 structure of the O-glycan, an important precursor in the biosynthesis of mucin-type glycoproteins. Plays an important role in the synthesis of mucin-type O-glycans in digestive organs. {ECO:0000250|UniProtKB:Q6ZMB0}.	Protein modification; protein glycosylation.	poly-N-acetyllactosamine biosynthetic process [GO:0030311]; protein glycosylation [GO:0006486]	acetylgalactosaminyl-O-glycosyl-seryl-glycoprotein beta-1,3-N-acetylglucosaminyltransferase activity [GO:0106328]; acetylgalactosaminyl-O-glycosyl-threonyl-glycoprotein beta-1,3-N-acetylglucosaminyltransferase activity [GO:0106327]; acetylgalactosaminyltransferase activity [GO:0008376]; acetylglucosaminyltransferase activity [GO:0008375]; galactosyltransferase activity [GO:0008378]; N-acetyllacto…	Glycosyltransferase 31 family		2.17925e-05	0.000106783	Galactose metabolism - Homo sapiens (human)	KEGG	path:hsa00052	GALM; HK1; PGM2	3098; 130589; 55276	31	31		0.000976958	0.00209348	Other types of O-glycan biosynthesis - Homo sapiens (human)	KEGG	path:hsa00514	OGT; GALNT2; ST6GAL1	2590; 6480; 8473	47	47
B4galnt2	current symbol	MGI:1342058	B4galnt2	beta-1,4-N-acetyl-galactosaminyl transferase 2	protein coding gene	ENSMUSG00000013418	14422	Q09199	Responsible for synthesis of murine T-lymphocyte CT antigen. Can transfer N-acetylgalactosamine moiety from UDP-GalNAc to the low molecular weight acceptor 3'-sialyl-N-acetyllactosamine, to form a non-reducing terminal tetrasaccharide Sda blood group structure.	Protein modification; protein glycosylation.	lipid glycosylation [GO:0030259]; negative regulation of cell-cell adhesion [GO:0022408]; protein glycosylation [GO:0006486]; UDP-N-acetylgalactosamine metabolic process [GO:0019276]; UDP-N-acetylglucosamine metabolic process [GO:0006047]	acetylgalactosaminyltransferase activity [GO:0008376]	Glycosyltransferase 2 family		2.63897e-05	0.000117554	Fructose and mannose metabolism - Homo sapiens (human)	KEGG	path:hsa00051	HK1; GMPPA; MPI	3098; 29926; 4351	33	33		0.0012926	0.00266123	Ganglio Sphingolipid Metabolism	Wikipathways	WP1423	ST8SIA5; B3GALT1	29906; 8708	13	13
B3galnt2	current symbol	MGI:2145517	B3galnt2	UDP-GalNAc:betaGlcNAc beta 1,3-galactosaminyltransferase, polypeptide 2	protein coding gene	ENSMUSG00000039242	97884	Q8BG28	Beta-1,3-N-acetylgalactosaminyltransferase that synthesizes a unique carbohydrate structure, GalNAc-beta-1-3GlcNAc, on N- and O-glycans. Has no galactose nor galactosaminyl transferase activity toward any acceptor substrate. Involved in alpha-dystroglycan (DAG1) glycosylation: acts coordinately with GTDC2/POMGnT2 to synthesize a GalNAc-beta3-GlcNAc-beta-terminus at the 4-position of protein O-man…	Protein modification; protein glycosylation.	protein glycosylation [GO:0006486]; protein O-linked glycosylation [GO:0006493]; UDP-N-acetylgalactosamine metabolic process [GO:0019276]	acetylgalactosaminyltransferase activity [GO:0008376]	Glycosyltransferase 31 family		3.04886e-05	0.000124495	Synthesis of GDP-mannose	Reactome	R-HSA-446205	GMPPA; MPI	29926; 4351	5	5		0.0012926	0.00266123	chondroitin sulfate biosynthesis (late stages)	HumanCyc	PWY-6567	CHST2; CSGALNACT1	55790; 9435	13	13
B3gnt3	current symbol	MGI:2152535	B3gnt3	UDP-GlcNAc:betaGal beta-1,3-N-acetylglucosaminyltransferase 3	protein coding gene	ENSMUSG00000031803	72297	Q5JCS9	Beta-1,3-N-acetylglucosaminyltransferase involved in the synthesis of poly-N-acetyllactosamine. Has activity for type 2 oligosaccharides. Also acts as a core1-1,3-N-acetylglucosaminyltransferase (Core1-beta3GlcNAcT) to form the 6-sulfo sialyl Lewis x on extended core1 O-glycans. {ECO:0000250|UniProtKB:Q9Y2A9}.	Protein modification; protein glycosylation.	poly-N-acetyllactosamine biosynthetic process [GO:0030311]; protein glycosylation [GO:0006486]	acetylgalactosaminyltransferase activity [GO:0008376]; acetylglucosaminyltransferase activity [GO:0008375]; beta-1,3-galactosyl-O-glycosyl-glycoprotein beta-1,3-N-acetylglucosaminyltransferase activity [GO:0047223]; beta-galactosyl-N-acetylglucosaminylgalactosylglucosyl-ceramide beta-1,3-acetylglucosaminyltransferase activity [GO:0008457]; N-acetyllactosaminide beta-1,3-N-acetylglucosaminyltransf…	Glycosyltransferase 31 family		4.5683e-05	0.000149231	GDP-glucose biosynthesis II	HumanCyc	PWY-5661-1	HK1; PGM2	3098; 55276	6	6		0.001504	0.00303693	Glycosaminoglycan biosynthesis - keratan sulfate - Homo sapiens (human)	KEGG	path:hsa00533	CHST2; FUT8	2530; 9435	14	14
B3gnt5	current symbol	MGI:2137302	B3gnt5	UDP-GlcNAc:betaGal beta-1,3-N-acetylglucosaminyltransferase 5	protein coding gene	ENSMUSG00000022686	108105	Q8BGY6	Beta-1,3-N-acetylglucosaminyltransferase that plays a key role in the synthesis of lacto- or neolacto-series carbohydrate chains on glycolipids, notably by participating in biosynthesis of HNK-1 and Lewis X carbohydrate structures. Has strong activity toward lactosylceramide (LacCer) and neolactotetraosylceramide (nLc(4)Cer; paragloboside), resulting in the synthesis of Lc(3)Cer and neolactopenta…	Protein modification; protein glycosylation.	brain development [GO:0007420]; central nervous system development [GO:0007417]; protein glycosylation [GO:0006486]; sphingolipid biosynthetic process [GO:0030148]	acetylgalactosaminyltransferase activity [GO:0008376]; acetylglucosaminyltransferase activity [GO:0008375]; beta-galactosyl-N-acetylglucosaminylgalactosylglucosyl-ceramide beta-1,3-acetylglucosaminyltransferase activity [GO:0008457]; lactosylceramide 1,3-N-acetyl-beta-D-glucosaminyltransferase activity [GO:0047256]	Glycosyltransferase 31 family		4.5683e-05	0.000149231	GDP-mannose biosynthesis	HumanCyc	PWY-5659	GMPPA; MPI	29926; 4351	6	6		0.00162647	0.00322226	ECM proteoglycans	Reactome	R-HSA-3000178	DCN; COL9A2; BGN	633; 1634; 1298	56	56
B3gnt2	current symbol	MGI:1889505	B3gnt2	UDP-GlcNAc:betaGal beta-1,3-N-acetylglucosaminyltransferase 2	protein coding gene	ENSMUSG00000051650	53625	Q9Z222	Beta-1,3-N-acetylglucosaminyltransferase involved in the synthesis of poly-N-acetyllactosamine. Catalyzes the initiation and elongation of poly-N-acetyllactosamine chains (PubMed:9892646). Probably constitutes the main polylactosamine synthase (PubMed:17890318). {ECO:0000269|PubMed:17890318, ECO:0000269|PubMed:9892646}.	Protein modification; protein glycosylation.	axon guidance [GO:0007411]; cellular response to leukemia inhibitory factor [GO:1990830]; poly-N-acetyllactosamine biosynthetic process [GO:0030311]; protein glycosylation [GO:0006486]; sensory perception of smell [GO:0007608]	acetylgalactosaminyltransferase activity [GO:0008376]; acetylglucosaminyltransferase activity [GO:0008375]; beta-galactosyl-N-acetylglucosaminylgalactosylglucosyl-ceramide beta-1,3-acetylglucosaminyltransferase activity [GO:0008457]; N-acetyllactosaminide beta-1,3-N-acetylglucosaminyltransferase activity [GO:0008532]	Glycosyltransferase 31 family		4.5683e-05	0.000149231	D-galactose degradation V (Leloir pathway)	HumanCyc	PWY66-422	GALM; PGM2	55276; 130589	6	6		0.00173075	0.00336535	Glycosphingolipid biosynthesis - globo and isoglobo series - Homo sapiens (human)	KEGG	path:hsa00603	B3GALT5; HEXB	10317; 3074	15	15
B3gnt4	current symbol	MGI:2680208	B3gnt4	UDP-GlcNAc:betaGal beta-1,3-N-acetylglucosaminyltransferase 4	protein coding gene	ENSMUSG00000029431	231727	Q1RLK6	Beta-1,3-N-acetylglucosaminyltransferase involved in the synthesis of poly-N-acetyllactosamine. Has activity for type 2 oligosaccharides. {ECO:0000250|UniProtKB:Q9C0J1}.	Protein modification; protein glycosylation.	poly-N-acetyllactosamine biosynthetic process [GO:0030311]; protein glycosylation [GO:0006486]	acetylgalactosaminyltransferase activity [GO:0008376]; acetylglucosaminyltransferase activity [GO:0008375]; beta-galactosyl-N-acetylglucosaminylgalactosylglucosyl-ceramide beta-1,3-acetylglucosaminyltransferase activity [GO:0008457]; N-acetyllactosaminide beta-1,3-N-acetylglucosaminyltransferase activity [GO:0008532]	Glycosyltransferase 31 family		9.29307e-05	0.0002846	N-Glycan biosynthesis - Homo sapiens (human)	KEGG	path:hsa00510	ALG3; MGAT2; DPM2	4247; 10195; 8818	50	50		0.00222978	0.00383815	Sialuria or French Type Sialuria	SMPDB	SMP00217	GNPDA1; UAP1	10007; 6675	17	17
B3galnt1	current symbol	MGI:1349405	B3galnt1	UDP-GalNAc:betaGlcNAc beta 1,3-galactosaminyltransferase, polypeptide 1	protein coding gene	ENSMUSG00000043300	26879	Q920V1	Transfers N-acetylgalactosamine onto globotriaosylceramide (PubMed:9417047). Plays a critical role in preimplantation stage embryonic development (PubMed:11463849). {ECO:0000269|PubMed:11463849, ECO:0000269|PubMed:9417047}.	Protein modification; protein glycosylation.	oligosaccharide biosynthetic process [GO:0009312]; poly-N-acetyllactosamine biosynthetic process [GO:0030311]; protein glycosylation [GO:0006486]	acetylgalactosaminyltransferase activity [GO:0008376]; acetylglucosaminyltransferase activity [GO:0008375]; galactosylgalactosylglucosylceramide beta-D-acetylgalactosaminyltransferase activity [GO:0047273]; N-acetyllactosaminide beta-1,3-N-acetylglucosaminyltransferase activity [GO:0008532]; UDP-galactose:beta-N-acetylglucosamine beta-1,3-galactosyltransferase activity [GO:0008499]	Glycosyltransferase 31 family		0.000117055	0.000337393	Heparan sulfate/heparin (HS-GAG) metabolism	Reactome	R-HSA-1638091	B3GAT1; NAGLU; IDS	27087; 3423; 4669	54	54		0.00222978	0.00383815	Sialuria or French Type Sialuria	SMPDB	SMP00216	GNPDA1; UAP1	10007; 6675	17	17
B3galt4	current symbol	MGI:1859517	B3galt4	UDP-Gal:betaGlcNAc beta 1,3-galactosyltransferase, polypeptide 4	protein coding gene	ENSMUSG00000067370	54218	Q9Z0F0	Involved in GM1/GD1B/GA1 ganglioside biosynthesis. {ECO:0000269|PubMed:10502288}.	Protein modification; protein glycosylation.	ganglioside biosynthetic process [GO:0001574]; protein glycosylation [GO:0006486]	acetylgalactosaminyltransferase activity [GO:0008376]; acetylglucosaminyltransferase activity [GO:0008375]; ganglioside galactosyltransferase activity [GO:0047915]; UDP-galactose:beta-N-acetylglucosamine beta-1,3-galactosyltransferase activity [GO:0008499]	Glycosyltransferase 31 family		0.000136452	0.000371451	dolichyl-diphosphooligosaccharide biosynthesis	HumanCyc	MANNOSYL-CHITO-DOLICHOL-BIOSYNTHESIS	ALG3; DPM2	8818; 10195	10	10		0.00222978	0.00383815	Amino Sugar Metabolism	SMPDB	SMP00045	GNPDA1; UAP1	10007; 6675	17	17
B3galt1	current symbol	MGI:1349403	B3galt1	UDP-Gal:betaGlcNAc beta 1,3-galactosyltransferase, polypeptide 1	protein coding gene	ENSMUSG00000034780	26877	O54904	Beta-1,3-galactosyltransferase that transfers galactose from UDP-alpha-D-galactose to substrates with a terminal beta-N-acetylglucosamine (beta-GlcNAc) residue. Involved in the biosynthesis of the carbohydrate moieties of glycolipids and glycoproteins. {ECO:0000269|PubMed:9417047}.	Protein modification; protein glycosylation.	galactosylceramide biosynthetic process [GO:0006682]; lipid glycosylation [GO:0030259]; oligosaccharide biosynthetic process [GO:0009312]; poly-N-acetyllactosamine biosynthetic process [GO:0030311]; protein glycosylation [GO:0006486]	acetylgalactosaminyltransferase activity [GO:0008376]; acetylglucosaminyltransferase activity [GO:0008375]; glucosaminylgalactosylglucosylceramide beta-galactosyltransferase activity [GO:0047275]; N-acetyllactosaminide beta-1,3-N-acetylglucosaminyltransferase activity [GO:0008532]; UDP-galactose:beta-N-acetylglucosamine beta-1,3-galactosyltransferase activity [GO:0008499]	Glycosyltransferase 31 family		0.000222654	0.000574213	Glycolysis / Gluconeogenesis - Homo sapiens (human)	KEGG	path:hsa00010	GALM; HK1; PGM2	55276; 3098; 130589	67	67		0.00222978	0.00383815	G(M2)-Gangliosidosis: Variant B, Tay-sachs disease	SMPDB	SMP00534	GNPDA1; UAP1	10007; 6675	17	17
B3galt2	current symbol	MGI:1349461	B3galt2	UDP-Gal:betaGlcNAc beta 1,3-galactosyltransferase, polypeptide 2	protein coding gene	ENSMUSG00000033849	26878	O54905	Beta-1,3-galactosyltransferase that transfers galactose from UDP-galactose to substrates with a terminal beta-N-acetylglucosamine (beta-GlcNAc) residue. Can also utilize substrates with a terminal galactose residue, albeit with lower efficiency. Involved in the biosynthesis of the carbohydrate moieties of glycolipids and glycoproteins. {ECO:0000269|PubMed:9417047}.	Protein modification; protein glycosylation.	galactosylceramide biosynthetic process [GO:0006682]; oligosaccharide biosynthetic process [GO:0009312]; poly-N-acetyllactosamine biosynthetic process [GO:0030311]; protein glycosylation [GO:0006486]	acetylgalactosaminyltransferase activity [GO:0008376]; acetylglucosaminyltransferase activity [GO:0008375]; glucosaminylgalactosylglucosylceramide beta-galactosyltransferase activity [GO:0047275]; N-acetyllactosaminide beta-1,3-N-acetylglucosaminyltransferase activity [GO:0008532]; UDP-galactose:beta-N-acetylglucosamine beta-1,3-galactosyltransferase activity [GO:0008499]	Glycosyltransferase 31 family		0.000409248	0.000979791	Glycosaminoglycan degradation	Wikipathways	WP4815	NAGLU; IDS	4669; 3423	17	17		0.00222978	0.00383815	Tay-Sachs Disease	SMPDB	SMP00390	GNPDA1; UAP1	10007; 6675	17	17
B3gnt9	current symbol	MGI:2142841	B3gnt9	UDP-GlcNAc:betaGal beta-1,3-N-acetylglucosaminyltransferase 9	protein coding gene	ENSMUSG00000069920	97440	Q8VI16	0	0	poly-N-acetyllactosamine biosynthetic process [GO:0030311]; protein glycosylation [GO:0006486]	acetylgalactosaminyltransferase activity [GO:0008376]; acetylglucosaminyltransferase activity [GO:0008375]; N-acetyllactosaminide beta-1,3-N-acetylglucosaminyltransferase activity [GO:0008532]	Glycosyltransferase 31 family		0.000459902	0.000979791	Fructose intolerance, hereditary	SMPDB	SMP00725	HK1; MPI	3098; 4351	18	18		0.00222978	0.00383815	Salla Disease/Infantile Sialic Acid Storage Disease	SMPDB	SMP00240	GNPDA1; UAP1	10007; 6675	17	17
B3gnt7	current symbol	MGI:2384394	B3gnt7	UDP-GlcNAc:betaGal beta-1,3-N-acetylglucosaminyltransferase 7	protein coding gene	ENSMUSG00000079445	227327	Q8K0J2	N-acetyl glucosamine (GlcNAc) transferase that catalyzes the transfer of GlcNAc via a beta1->3 linkage from UDP-GlcNAc to the non-reducing terminal galactose (Gal) in the linearly growing chain of N- and O-linked keratan sulfate proteoglycans. Cooperates with B4GALT4 galactosyltransferase and CHST6 and CHST1 sulfotransferases to construct and elongate mono- and disulfated disaccharide units [->3G…	Protein modification; protein glycosylation. {ECO:0000250|UniProtKB:Q8NFL0}.	poly-N-acetyllactosamine biosynthetic process [GO:0030311]; protein glycosylation [GO:0006486]	acetylgalactosaminyltransferase activity [GO:0008376]; acetylglucosaminyltransferase activity [GO:0008375]; N-acetyllactosaminide beta-1,3-N-acetylglucosaminyltransferase activity [GO:0008532]	Glycosyltransferase 31 family		0.000459902	0.000979791	Fructose and Mannose Degradation	SMPDB	SMP00064	HK1; MPI	3098; 4351	18	18		0.00222978	0.00383815	dermatan sulfate biosynthesis	HumanCyc	PWY-6571	B3GAT1; CSGALNACT1	55790; 27087	17	17
B3galt5	current symbol	MGI:2136878	B3galt5	UDP-Gal:betaGlcNAc beta 1,3-galactosyltransferase, polypeptide 5	protein coding gene	ENSMUSG00000074892	93961	Q9JI67	Catalyzes the transfer of Gal to GlcNAc-based acceptors with a preference for the core3 O-linked glycan GlcNAc(beta1,3)GalNAc structure. Can use glycolipid LC3Cer as an efficient acceptor. Also catalyzes the transfer of Gal to the terminal GalNAc unit of the globoside GB4, thereby synthesizing the glycolipid GB5, also known as the stage-specific embryonic antigen-3 (SSEA-3).	Protein modification; protein glycosylation.	poly-N-acetyllactosamine biosynthetic process [GO:0030311]; protein glycosylation [GO:0006486]; response to bacterium [GO:0009617]	acetylgalactosaminyltransferase activity [GO:0008376]; acetylglucosaminyltransferase activity [GO:0008375]; N-acetyllactosaminide beta-1,3-N-acetylglucosaminyltransferase activity [GO:0008532]	Glycosyltransferase 31 family		0.000459902	0.000979791	Fructosuria	SMPDB	SMP00561	HK1; MPI	3098; 4351	18	18		0.00250181	0.00410453	Proteoglycan biosynthesis	Wikipathways	WP4784	EXT1; CSGALNACT1	2131; 55790	18	18
B3gnt8	current symbol	MGI:2385269	B3gnt8	UDP-GlcNAc:betaGal beta-1,3-N-acetylglucosaminyltransferase 8	protein coding gene	ENSMUSG00000059479	232984	Q8R3I9	Beta-1,3-N-acetylglucosaminyltransferase that plays a role in the elongation of specific branch structures of multiantennary N-glycans. Has strong activity towards tetraantennary N-glycans and 2,6 triantennary glycans (By similarity). {ECO:0000250|UniProtKB:Q7Z7M8}.	Protein modification; protein glycosylation. {ECO:0000305}.	poly-N-acetyllactosamine biosynthetic process [GO:0030311]; protein glycosylation [GO:0006486]	acetylgalactosaminyltransferase activity [GO:0008376]; acetylglucosaminyltransferase activity [GO:0008375]; N-acetyllactosaminide beta-1,3-N-acetylglucosaminyltransferase activity [GO:0008532]; protein N-acetylglucosaminyltransferase activity [GO:0016262]	Glycosyltransferase 31 family		0.000492559	0.00100564	Post-translational protein modification	Reactome	R-HSA-597592	ALG3; CALR; GMPPA; FBXO2; MPI; MGAT2; EDEM2; GFPT2; DPM2	29926; 9945; 8818; 4247; 811; 26232; 10195; 4351; 55741	1425	1425		0.00250181	0.00410453	Lewis blood group biosynthesis	Reactome	R-HSA-9037629	B3GALT5; B3GALT1	10317; 8708	18	18
Chpf2	current symbol	MGI:1917522	Chpf2	chondroitin polymerizing factor 2	protein coding gene	ENSMUSG00000038181	100910	A0A0G2JFI5	0	0	chondroitin sulfate biosynthetic process [GO:0030206]	acetylgalactosaminyltransferase activity [GO:0008376]; glucuronosyl-N-acetylgalactosaminyl-proteoglycan 4-beta-N-acetylgalactosaminyltransferase activity [GO:0047238]	Chondroitin N-acetylgalactosaminyltransferase family		0.000513447	0.00100636	Glycosaminoglycan degradation - Homo sapiens (human)	KEGG	path:hsa00531	NAGLU; IDS	4669; 3423	19	19		0.00250181	0.00410453	er associated degradation (erad) pathway	BioCarta	eradpathway	MAN1B1; MAN2B1	11253; 4125	18	18
Csgalnact1	current symbol	MGI:2442354	Csgalnact1	chondroitin sulfate N-acetylgalactosaminyltransferase 1	protein coding gene	ENSMUSG00000036356	234356	Q8BJQ9	Transfers 1,4-N-acetylgalactosamine (GalNAc) from UDP-GalNAc to the non-reducing end of glucuronic acid (GlcUA). Required for addition of the first GalNAc to the core tetrasaccharide linker and for elongation of chondroitin chains. Important role in chondroitin chain biosynthesis in cartilage formation, and subsequent endochondral ossification (PubMed:17145758, PubMed:21148564). Moreover, is invo…	0	cartilage development [GO:0051216]; chondroitin sulfate biosynthetic process [GO:0030206]; chondroitin sulfate metabolic process [GO:0030204]; chondroitin sulfate proteoglycan biosynthetic process, polysaccharide chain biosynthetic process [GO:0050653]; endochondral ossification [GO:0001958]; extracellular matrix organization [GO:0030198]; UDP-glucuronate metabolic process [GO:0046398]; UDP-N-ace…	acetylgalactosaminyltransferase activity [GO:0008376]; glucuronosyl-N-acetylgalactosaminyl-proteoglycan 4-beta-N-acetylgalactosaminyltransferase activity [GO:0047238]; glucuronosyltransferase activity [GO:0015020]; glucuronylgalactosylproteoglycan 4-beta-N-acetylgalactosaminyltransferase activity [GO:0047237]; metal ion binding [GO:0046872]; peptidoglycan glycosyltransferase activity [GO:0008955]	Chondroitin N-acetylgalactosaminyltransferase family		0.000629175	0.00118575	HS-GAG degradation	Reactome	R-HSA-2024096	NAGLU; IDS	4669; 3423	21	21		0.00278868	0.00450479	ER Quality Control Compartment (ERQC)	Reactome	R-HSA-901032	MAN1B1; OS9	11253; 10956	19	19
Chsy1	current symbol	MGI:2681120	Chsy1	chondroitin sulfate synthase 1	protein coding gene	ENSMUSG00000032640	269941	Q6ZQ11	Has both beta-1,3-glucuronic acid and beta-1,4-N-acetylgalactosamine transferase activity. Transfers glucuronic acid (GlcUA) from UDP-GlcUA and N-acetylgalactosamine (GalNAc) from UDP-GalNAc to the non-reducing end of the elongating chondroitin polymer. {ECO:0000250|UniProtKB:Q86X52}.	0	bone morphogenesis [GO:0060349]; cartilage development [GO:0051216]; chondrocyte development [GO:0002063]; chondroitin sulfate biosynthetic process [GO:0030206]; negative regulation of ossification [GO:0030279]; positive regulation of smoothened signaling pathway [GO:0045880]; proximal/distal pattern formation [GO:0009954]; response to nutrient levels [GO:0031667]; sulfation [GO:0051923]	acetylgalactosaminyltransferase activity [GO:0008376]; glucuronosyl-N-acetylgalactosaminyl-proteoglycan 4-beta-N-acetylgalactosaminyltransferase activity [GO:0047238]; glycosyltransferase activity [GO:0016757]; metal ion binding [GO:0046872]; N-acetylgalactosaminyl-proteoglycan 3-beta-glucuronosyltransferase activity [GO:0050510]	Chondroitin N-acetylgalactosaminyltransferase family		0.000824215	0.0014958	Calnexin/calreticulin cycle	Reactome	R-HSA-901042	CALR; EDEM2	811; 55741	24	24		0.00309027	0.00484296	Aminosugars metabolism	INOH	None	GNPDA1; UAP1	10007; 6675	20	20
Chpf	current symbol	MGI:106576	Chpf	chondroitin polymerizing factor	protein coding gene	ENSMUSG00000032997	74241	Q6IQX7	Has both beta-1,3-glucuronic acid and beta-1,4-N-acetylgalactosamine transferase activity. Transfers glucuronic acid (GlcUA) from UDP-GlcUA and N-acetylgalactosamine (GalNAc) from UDP-GalNAc to the non-reducing end of the elongating chondroitin polymer (By similarity). Isoform 2 may facilitate PRKN transport into the mitochondria. In collaboration with PRKN, isoform 2 may enhance cell viability a…	0	chondroitin sulfate biosynthetic process [GO:0030206]	acetylgalactosaminyltransferase activity [GO:0008376]; glucuronosyl-N-acetylgalactosaminyl-proteoglycan 4-beta-N-acetylgalactosaminyltransferase activity [GO:0047238]; glycosyltransferase activity [GO:0016757]; metal ion binding [GO:0046872]; N-acetylgalactosaminyl-proteoglycan 3-beta-glucuronosyltransferase activity [GO:0050510]	Chondroitin N-acetylgalactosaminyltransferase family		0.0011239	0.00192752	Keratan sulfate biosynthesis	Reactome	R-HSA-2022854	CHST5; KERA	23563; 11081	28	28		0.00309027	0.00484296	Blood group systems biosynthesis	Reactome	R-HSA-9033658	B3GALT5; B3GALT1	10317; 8708	20	20
Chsy3	current symbol	MGI:1926173	Chsy3	chondroitin sulfate synthase 3	protein coding gene	ENSMUSG00000058152	78923	Q5DTK1	Has both beta-1,3-glucuronic acid and beta-1,4-N-acetylgalactosamine transferase activity. Transfers glucuronic acid (GlcUA) from UDP-GlcUA and N-acetylgalactosamine (GalNAc) from UDP-GalNAc to the non-reducing end of the elongating chondroitin polymer. Specific activity is much reduced compared to CHSY1. {ECO:0000250|UniProtKB:Q70JA7}.	0	chondroitin sulfate biosynthetic process [GO:0030206]	acetylgalactosaminyltransferase activity [GO:0008376]; glucuronosyl-N-acetylgalactosaminyl-proteoglycan 4-beta-N-acetylgalactosaminyltransferase activity [GO:0047238]; metal ion binding [GO:0046872]; N-acetylgalactosaminyl-proteoglycan 3-beta-glucuronosyltransferase activity [GO:0050510]	Chondroitin N-acetylgalactosaminyltransferase family		0.00114078	0.00192752	Metabolism	Reactome	R-HSA-1430728	UGT1A10; NAGLU; HK1; IDS; PGM2; SLC35B2; FUT1; B3GAT1; CHST5; KERA	4669; 347734; 27087; 54575; 2523; 23563; 11081; 55276; 3423; 3098	1954	1952		0.00388575	0.00600005	Neutrophil degranulation	Reactome	R-HSA-6798695	AGL; MANBA; ARSB; MAN2B1; HEXB; CLEC4D; HGSNAT	138050; 3074; 4125; 4126; 411; 178; 338339	487	486
B4galnt3	current symbol	MGI:3041155	B4galnt3	beta-1,4-N-acetyl-galactosaminyl transferase 3	protein coding gene	ENSMUSG00000041372	330406	Q6L8S8	Transfers N-acetylgalactosamine (GalNAc) from UDP-GalNAc to N-acetylglucosamine-beta-benzyl with a beta-1,4-linkage to form N,N'-diacetyllactosediamine, GalNAc-beta-1,4-GlcNAc structures in N-linked glycans and probably O-linked glycans. Mediates the N,N'-diacetyllactosediamine formation on gastric mucosa (By similarity). {ECO:0000250}.	0	0	acetylgalactosaminyltransferase activity [GO:0008376]; N-acetyl-beta-glucosaminyl-glycoprotein 4-beta-N-acetylgalactosaminyltransferase activity [GO:0033842]	Chondroitin N-acetylgalactosaminyltransferase family		0.00156136	0.00246796	N-glycan trimming in the ER and Calnexin/Calreticulin cycle	Reactome	R-HSA-532668	CALR; EDEM2	811; 55741	33	33		0.00408212	0.00612318	Translation of structural proteins	Reactome	R-HSA-9683701	PRKCSH; ST6GAL1	5589; 6480	23	23
B4galnt4	current symbol	MGI:2652891	B4galnt4	beta-1,4-N-acetyl-galactosaminyl transferase 4	protein coding gene	ENSMUSG00000055629	330671	Q766D5	Transfers N-acetylgalactosamine (GalNAc) from UDP-GalNAc to N-acetylglucosamine-beta-benzyl with a beta-1,4-linkage to form N,N'-diacetyllactosediamine, GalNAc-beta-1,4-GlcNAc structures in N-linked glycans and probably O-linked glycans. {ECO:0000250}.	0	0	acetylgalactosaminyltransferase activity [GO:0008376]; N-acetyl-beta-glucosaminyl-glycoprotein 4-beta-N-acetylgalactosaminyltransferase activity [GO:0033842]	Chondroitin N-acetylgalactosaminyltransferase family		0.00156136	0.00246796	Keratan sulfate/keratin metabolism	Reactome	R-HSA-1638074	CHST5; KERA	23563; 11081	33	33		0.00408212	0.00612318	Translation of structural proteins	Reactome	R-HSA-9694635	PRKCSH; ST6GAL1	5589; 6480	23	23
Mgat4d	current symbol	MGI:1914805	Mgat4d	MGAT4 family, member C	protein coding gene	ENSMUSG00000035057	67555	Q9D4R2	[Isoform 2]: May play a role in male spermatogenesis. In vitro acts as inhibitor of MGAT1 activity causing cell surface proteins to carry mainly high mannose N-glycans. The function is mediated by its lumenal domain and occurs specifically in the Golgi. A catalytic glucosyltransferase activity is not detected. May be involved in regulation of Sertoli-germ cell interactions during specific stages …	0	cell differentiation [GO:0030154]; negative regulation of protein glycosylation [GO:0060051]; protein N-linked glycosylation [GO:0006487]; spermatogenesis [GO:0007283]	acetylglucosaminyltransferase activity [GO:0008375]	Glycosyltransferase 54 family		0.00185691	0.00284339	Starch and sucrose metabolism - Homo sapiens (human)	KEGG	path:hsa00500	HK1; PGM2	3098; 55276	36	36		0.0048147	0.00712033	Cytosolic sulfonation of small molecules	Reactome	R-HSA-156584	TPST2; TPST1	8459; 8460	25	25
Mgat1	current symbol	MGI:96973	Mgat1	mannoside acetylglucosaminyltransferase 1	protein coding gene	ENSMUSG00000020346	17308	P27808	Initiates complex N-linked carbohydrate formation. Essential for the conversion of high-mannose to hybrid and complex N-glycans. {ECO:0000269|PubMed:1421759}.	Protein modification; protein glycosylation. {ECO:0000269|PubMed:1421759}.	in utero embryonic development [GO:0001701]; protein glycosylation [GO:0006486]; protein N-linked glycosylation [GO:0006487]; protein N-linked glycosylation via asparagine [GO:0018279]; UDP-N-acetylglucosamine catabolic process [GO:0006049]	acetylglucosaminyltransferase activity [GO:0008375]; alpha-1,3-mannosylglycoprotein 2-beta-N-acetylglucosaminyltransferase activity [GO:0003827]; manganese ion binding [GO:0030145]	Glycosyltransferase 13 family		0.00217695	0.00323245	Various types of N-glycan biosynthesis - Homo sapiens (human)	KEGG	path:hsa00513	ALG3; MGAT2	4247; 10195	39	39		0.00520204	0.00758631	N-glycan antennae elongation in the medial/trans-Golgi	Reactome	R-HSA-975576	ST6GAL1; FUT8	2530; 6480	26	26
Mgat4b	current symbol	MGI:2143974	Mgat4b	mannoside acetylglucosaminyltransferase 4, isoenzyme B	protein coding gene	ENSMUSG00000036620	103534	Q812F8	Glycosyltransferase that participates in the transfer of N-acetylglucosamine (GlcNAc) to the core mannose residues of N-linked glycans. Catalyzes the formation of the GlcNAcbeta1-4 branch on the GlcNAcbeta1-2Manalpha1-3 arm of the core structure of N-linked glycans. Essential for the production of tri- and tetra-antennary N-linked sugar chains. Has lower affinities for donors or acceptors than MG…	Protein modification; protein glycosylation.	protein N-linked glycosylation [GO:0006487]	acetylglucosaminyltransferase activity [GO:0008375]; alpha-1,3-mannosylglycoprotein 4-beta-N-acetylglucosaminyltransferase activity [GO:0008454]; glycosyltransferase activity [GO:0016757]; metal ion binding [GO:0046872]	Glycosyltransferase 54 family		0.00252125	0.00363356	N-Glycan biosynthesis	EHMN	N-Glycan biosynthesis	ALG3; MGAT2	10195; 4247	42	42		0.00560325	0.00805722	Glycosphingolipid biosynthesis - lacto and neolacto series - Homo sapiens (human)	KEGG	path:hsa00601	B3GALT5; B3GALT1	8708; 10317	27	27
Mgat4a	current symbol	MGI:2662992	Mgat4a	mannoside acetylglucosaminyltransferase 4, isoenzyme A	protein coding gene	ENSMUSG00000026110	269181	Q812G0	Glycosyltransferase that participates in the transfer of N-acetylglucosamine (GlcNAc) to the core mannose residues of N-linked glycans. Catalyzes the formation of the GlcNAcbeta1-4 branch on the GlcNAcbeta1-2Manalpha1-3 arm of the core structure of N-linked glycans. Essential for the production of tri- and tetra-antennary N-linked sugar chains. Involved in glucose transport by mediating SLC2A2/GL…	Protein modification; protein glycosylation.	protein N-linked glycosylation [GO:0006487]	acetylglucosaminyltransferase activity [GO:0008375]; alpha-1,3-mannosylglycoprotein 4-beta-N-acetylglucosaminyltransferase activity [GO:0008454]; glycosyltransferase activity [GO:0016757]; metal ion binding [GO:0046872]	Glycosyltransferase 54 family		0.00331424	0.00463993	Protein processing in endoplasmic reticulum - Homo sapiens (human)	KEGG	path:hsa04141	FBXO2; EDEM2; CALR	26232; 811; 55741	171	170		0.00567842	0.00805722	Sphingolipid metabolism	Reactome	R-HSA-428157	UGCG; HEXB; ARSB	411; 3074; 7357	87	87
Mgat4c	current symbol	MGI:1914819	Mgat4c	MGAT4 family, member C	protein coding gene	ENSMUSG00000019888	67569	Q9D306	Glycosyltransferase that participates in the transfer of N-acetylglucosamine (GlcNAc) to the core mannose residues of N-linked glycans. Catalyzes the formation of the GlcNAcbeta1-4 branch on the GlcNAcbeta1-2Manalpha1-3 arm of the core structure of N-linked glycans. Essential for the production of tri- and tetra-antennary N-linked sugar chains. Does not catalyze the transfer of GlcNAc to the Mana…	Protein modification; protein glycosylation.	protein N-linked glycosylation [GO:0006487]	acetylglucosaminyltransferase activity [GO:0008375]; alpha-1,3-mannosylglycoprotein 4-beta-N-acetylglucosaminyltransferase activity [GO:0008454]; metal ion binding [GO:0046872]	Glycosyltransferase 54 family		0.00355603	0.00484016	Chondroitin sulfate/dermatan sulfate metabolism	Reactome	R-HSA-1793185	B3GAT1; IDS	27087; 3423	50	50		0.00601821	0.00842549	Keratan sulfate biosynthesis	Reactome	R-HSA-2022854	OGN; CHST2	4969; 9435	28	28
Mgat5	current symbol	MGI:894701	Mgat5	mannoside acetylglucosaminyltransferase 5	protein coding gene	ENSMUSG00000036155	107895	Q8R4G6	Catalyzes the addition of N-acetylglucosamine (GlcNAc) in beta 1-6 linkage to the alpha-linked mannose of biantennary N-linked oligosaccharides (PubMed:10700233, PubMed:14561752, PubMed:22715095). Catalyzes an important step in the biosynthesis of branched, complex-type N-glycans, such as those found on EGFR, TGFR (TGF-beta receptor) and CDH2 (PubMed:12122020, PubMed:10700233, PubMed:14561752, Pu…	Protein modification; protein glycosylation. {ECO:0000269|PubMed:10700233, ECO:0000269|PubMed:12122020, ECO:0000269|PubMed:22715095}.	negative regulation of protein tyrosine phosphatase activity [GO:1903614]; positive regulation of cell migration [GO:0030335]; positive regulation of receptor signaling pathway via STAT [GO:1904894]; protein N-linked glycosylation [GO:0006487]; protein N-linked glycosylation via asparagine [GO:0018279]	acetylglucosaminyltransferase activity [GO:0008375]; alpha-1,6-mannosylglycoprotein 6-beta-N-acetylglucosaminyltransferase activity [GO:0030144]; glycosyltransferase activity [GO:0016757]; manganese ion binding [GO:0030145]; protein phosphatase inhibitor activity [GO:0004864]	Glycosyltransferase 18 family		0.00440911	0.00583909	Metabolism of proteins	Reactome	R-HSA-392499	ALG3; CALR; GMPPA; FBXO2; MPI; MGAT2; EDEM2; GFPT2; DPM2	29926; 9945; 8818; 4247; 811; 26232; 10195; 4351; 55741	1935	1934		0.0064468	0.00890677	mucin core 1 and core 2 <i>O</i>-glycosylation	HumanCyc	PWY-7433	GCNT1; GALNT2	2650; 2590	29	29
Pomgnt1	current symbol	MGI:1915523	Pomgnt1	protein O-linked mannose beta 1,2-N-acetylglucosaminyltransferase	protein coding gene	ENSMUSG00000028700	68273	Q91X88	Participates in O-mannosyl glycosylation by catalyzing the addition of N-acetylglucosamine to O-linked mannose on glycoproteins. Catalyzes the synthesis of the GlcNAc(beta1-2)Man(alpha1-)O-Ser/Thr moiety on alpha-dystroglycan and other O-mannosylated proteins, providing the necessary basis for the addition of further carbohydrate moieties. Is specific for alpha linked terminal mannose. {ECO:00002…	Protein modification; protein glycosylation. {ECO:0000250|UniProtKB:Q8WZA1}.	O-glycan processing [GO:0016266]; protein O-linked glycosylation [GO:0006493]	acetylglucosaminyltransferase activity [GO:0008375]; beta-1,3-galactosyl-O-glycosyl-glycoprotein beta-1,3-N-acetylglucosaminyltransferase activity [GO:0047223]; manganese ion binding [GO:0030145]	Glycosyltransferase 13 family												0.00703549	0.00959384	Post-translational modification: synthesis of GPI-anchored proteins	Reactome	R-HSA-163125	PIGP; PIGA; PIGQ	5277; 51227; 9091	94	94
Gcnt1	current symbol	MGI:95676	Gcnt1	glucosaminyl (N-acetyl) transferase 1, core 2	protein coding gene	ENSMUSG00000038843	14537	Q09324	Glycosyltransferase that catalyzes the transfer of an N-acetylglucosamine moiety onto mucin-type core 1 O-glycan to form the branched mucin-type core 2 O-glycan. Mucin-type core 2 O-glycans play an important role in leukocyte extravasation as they serve as scaffolds for the display of the selectin ligand sialyl Lewis X by leukocytes. {ECO:0000269|PubMed:7983056}.	Protein modification; protein glycosylation.	cell adhesion molecule production [GO:0060352]; glycoprotein biosynthetic process [GO:0009101]; kidney morphogenesis [GO:0060993]; leukocyte tethering or rolling [GO:0050901]; protein glycosylation [GO:0006486]; response to insulin [GO:0032868]; tissue morphogenesis [GO:0048729]	acetylglucosaminyltransferase activity [GO:0008375]; beta-1,3-galactosyl-O-glycosyl-glycoprotein beta-1,6-N-acetylglucosaminyltransferase activity [GO:0003829]	Glycosyltransferase 14 family		Ketamine Treatment - Striatal Tissue-2hr										0.00734444	0.00988674	SARS-CoV-1 Infection	Reactome	R-HSA-9678108	PRKCSH; ST6GAL1	5589; 6480	31	31
Gcnt4	current symbol	MGI:2684919	Gcnt4	glucosaminyl (N-acetyl) transferase 4, core 2 (beta-1,6-N-acetylglucosaminyltransferase)	protein coding gene	ENSMUSG00000091387	218476	E9Q649	Glycosyltransferase that mediates core 2 O-glycan branching, an important step in mucin-type biosynthesis. Does not have core 4 O-glycan or I-branching enzyme activity. {ECO:0000250|UniProtKB:Q9P109}.	Protein modification; protein glycosylation.	homeostasis of number of cells [GO:0048872]; inter-male aggressive behavior [GO:0002121]; kidney morphogenesis [GO:0060993]; protein glycosylation [GO:0006486]; thyroid hormone metabolic process [GO:0042403]; tissue morphogenesis [GO:0048729]	acetylglucosaminyltransferase activity [GO:0008375]; beta-1,3-galactosyl-O-glycosyl-glycoprotein beta-1,6-N-acetylglucosaminyltransferase activity [GO:0003829]	Glycosyltransferase 14 family		p-value	q-value	pathway	source	external_id	members_input_overlap	members_input_overlap_geneids	size	effective_size		0.00746079	0.00991624	Metapathway biotransformation Phase I and II	Wikipathways	WP702	NDST1; CHST2; HS6ST2; HS3ST1	9957; 90161; 9435; 3340	186	186
Hexb	current symbol	MGI:96074	Hexb	hexosaminidase B	protein coding gene	ENSMUSG00000021665	15212	P20060	Hydrolyzes the non-reducing end N-acetyl-D-hexosamine and/or sulfated N-acetyl-D-hexosamine of glycoconjugates, such as the oligosaccharide moieties from proteins and neutral glycolipids, or from certain mucopolysaccharides. The isozyme B does not hydrolyze each of these substrates, however hydrolyzes efficiently neutral oligosaccharide. Only the isozyme A is responsible for the degradation of GM…	0	astrocyte cell migration [GO:0043615]; cellular calcium ion homeostasis [GO:0006874]; cellular protein metabolic process [GO:0044267]; ganglioside catabolic process [GO:0006689]; glycosaminoglycan metabolic process [GO:0030203]; glycosphingolipid metabolic process [GO:0006687]; lipid storage [GO:0019915]; locomotory behavior [GO:0007626]; lysosome organization [GO:0007040]; male courtship behavio…	acetylglucosaminyltransferase activity [GO:0008375]; beta-N-acetylglucosaminidase activity [GO:0016231]; beta-N-acetylhexosaminidase activity [GO:0004563]; carbohydrate binding [GO:0030246]; hexosaminidase activity [GO:0015929]; hydrolase activity [GO:0016787]; identical protein binding [GO:0042802]; N-acetyl-beta-D-galactosaminidase activity [GO:0102148]; protein-containing complex binding [GO:0…	Glycosyl hydrolase 20 family		6.36328e-05	0.000655155	Glycosphingolipid biosynthesis - globo and isoglobo series - Homo sapiens (human)	KEGG	path:hsa00603	ST8SIA1; FUT9	10690; 6489	15	15		0.00781324	0.0101283	Mucin type O-glycan biosynthesis - Homo sapiens (human)	KEGG	path:hsa00512	GCNT1; GALNT2	2590; 2650	32	32
Hexa	current symbol	MGI:96073	Hexa	hexosaminidase A	protein coding gene	ENSMUSG00000025232	15211	P29416	Hydrolyzes the non-reducing end N-acetyl-D-hexosamine and/or sulfated N-acetyl-D-hexosamine of glycoconjugates, such as the oligosaccharide moieties from proteins and neutral glycolipids, or from certain mucopolysaccharides. The isozyme S is as active as the isozyme A on the anionic bis-sulfated glycans, the chondroitin-6-sulfate trisaccharide (C6S-3), and the dermatan sulfate pentasaccharide, an…	0	adult walking behavior [GO:0007628]; carbohydrate metabolic process [GO:0005975]; cell morphogenesis involved in neuron differentiation [GO:0048667]; ganglioside catabolic process [GO:0006689]; glycosaminoglycan biosynthetic process [GO:0006024]; glycosaminoglycan metabolic process [GO:0030203]; lipid storage [GO:0019915]; locomotory behavior [GO:0007626]; lysosome organization [GO:0007040]; myel…	acetylglucosaminyltransferase activity [GO:0008375]; beta-N-acetylhexosaminidase activity [GO:0004563]; N-acetyl-beta-D-galactosaminidase activity [GO:0102148]; protein heterodimerization activity [GO:0046982]	Glycosyl hydrolase 20 family		7.26907e-05	0.000655155	Glycosphingolipid biosynthesis - neolactoseries	EHMN	Glycosphingolipid biosynthesis - neolactoseries	FUT9; ST8SIA1	6489; 10690	16	16		0.00781324	0.0101283	SARS-CoV-2 Infection	Reactome	R-HSA-9694516	PRKCSH; ST6GAL1	5589; 6480	32	32
Extl1	current symbol	MGI:1888742	Extl1	exostosin-like glycosyltransferase 1	protein coding gene	ENSMUSG00000028838	56219	Q9JKV7	Probable glycosyltransferase. {ECO:0000250}.	Protein modification; protein glycosylation.	protein glycosylation [GO:0006486]	acetylglucosaminyltransferase activity [GO:0008375]; glucuronosyl-N-acetylglucosaminyl-proteoglycan 4-alpha-N-acetylglucosaminyltransferase activity [GO:0050508]; glucuronosyltransferase activity [GO:0015020]; glycosyltransferase activity [GO:0016757]	Glycosyltransferase 47 family		0.000103446	0.000655155	Globo Sphingolipid Metabolism	Wikipathways	WP1424	FUT9; ST8SIA1	6489; 10690	19	19		0.00829522	0.0106219	Fructose and mannose metabolism - Homo sapiens (human)	KEGG	path:hsa00051	FPGT; GMPPA	8790; 29926	33	33
Ext2	current symbol	MGI:108050	Ext2	exostosin glycosyltransferase 2	protein coding gene	ENSMUSG00000027198	14043	P70428	Glycosyltransferase required for the biosynthesis of heparan-sulfate. The EXT1/EXT2 complex possesses substantially higher glycosyltransferase activity than EXT1 or EXT2 alone. Appears to be a tumor suppressor. Required for the exosomal release of SDCBP, CD63 and syndecan. {ECO:0000250|UniProtKB:Q93063}.	Protein modification; protein glycosylation.	cell differentiation [GO:0030154]; cellular polysaccharide biosynthetic process [GO:0033692]; cellular response to fibroblast growth factor stimulus [GO:0044344]; endochondral bone morphogenesis [GO:0060350]; fluid transport [GO:0042044]; gene expression [GO:0010467]; glycosaminoglycan biosynthetic process [GO:0006024]; heart contraction [GO:0060047]; heparan sulfate proteoglycan biosynthetic pro…	acetylglucosaminyltransferase activity [GO:0008375]; glucuronosyl-N-acetylglucosaminyl-proteoglycan 4-alpha-N-acetylglucosaminyltransferase activity [GO:0050508]; glucuronosyltransferase activity [GO:0015020]; glycosyltransferase activity [GO:0016757]; heparan sulfate N-acetylglucosaminyltransferase activity [GO:0042328]; metal ion binding [GO:0046872]; N-acetylglucosaminyl-proteoglycan 4-beta-gl…	Glycosyltransferase 47 family		0.000152778	0.000725694	FGF23 signaling in hypophosphatemic rickets and related disorders	Wikipathways	WP4790	KL; GALNT3	2591; 9365	23	23		0.00981905	0.0124217	O-Glycan biosynthesis	EHMN	O-Glycan biosynthesis	GCNT1; GALNT2	2650; 2590	36	36
Ext1	current symbol	MGI:894663	Ext1	exostosin glycosyltransferase 1	protein coding gene	ENSMUSG00000061731	14042	P97464	Glycosyltransferase required for the biosynthesis of heparan-sulfate. The EXT1/EXT2 complex possesses substantially higher glycosyltransferase activity than EXT1 or EXT2 alone. Required for the exosomal release of SDCBP, CD63 and syndecan (By similarity). {ECO:0000250|UniProtKB:Q16394}.	Protein modification; protein glycosylation.	antigen processing and presentation [GO:0019882]; axon guidance [GO:0007411]; basement membrane organization [GO:0071711]; blood vessel remodeling [GO:0001974]; BMP signaling pathway [GO:0030509]; bone growth [GO:0098868]; bone morphogenesis [GO:0060349]; bone resorption [GO:0045453]; brain development [GO:0007420]; canonical Wnt signaling pathway [GO:0060070]; cartilage development involved in e…	acetylglucosaminyltransferase activity [GO:0008375]; glucuronosyl-N-acetylglucosaminyl-proteoglycan 4-alpha-N-acetylglucosaminyltransferase activity [GO:0050508]; glucuronosyltransferase activity [GO:0015020]; glycosyltransferase activity [GO:0016757]; metal ion binding [GO:0046872]; N-acetylglucosaminyl-proteoglycan 4-beta-glucuronosyltransferase activity [GO:0050509]; protein heterodimerization…	Glycosyltransferase 47 family		0.000211578	0.000800629	Glycosphingolipid biosynthesis - lacto and neolacto series - Homo sapiens (human)	KEGG	path:hsa00601	ST8SIA1; FUT9	10690; 6489	27	27
Pomgnt2	current symbol	MGI:2143424	Pomgnt2	protein O-linked mannose beta 1,4-N-acetylglucosaminyltransferase 2	protein coding gene	ENSMUSG00000066235	215494	Q8BW41	O-linked mannose beta-1,4-N-acetylglucosaminyltransferase that transfers UDP-N-acetyl-D-glucosamine to the 4-position of the mannose to generate N-acetyl-D-glucosamine-beta-1,4-O-D-mannosylprotein (By similarity). Involved in the biosynthesis of the phosphorylated O-mannosyl trisaccharide (N-acetylgalactosamine-beta-3-N-acetylglucosamine-beta-4-(phosphate-6-)mannose), a carbohydrate structure pre…	Protein modification; protein glycosylation. {ECO:0000269|PubMed:24256719}.	neuron migration [GO:0001764]; protein O-linked glycosylation [GO:0006493]; protein O-linked mannosylation [GO:0035269]	acetylglucosaminyltransferase activity [GO:0008375]; glycosyltransferase activity [GO:0016757]; protein O-GlcNAc transferase activity [GO:0097363]	Glycosyltransferase 61 family		0.000261861	0.000800629	Ascorbate and aldarate metabolism - Homo sapiens (human)	KEGG	path:hsa00053	UGT1A10; KL	9365; 54575	30	30		Phencyclidine Treatment - Striatal Tissue-4hr
A4gnt	current symbol	MGI:2143261	A4gnt	alpha-1,4-N-acetylglucosaminyltransferase	protein coding gene	ENSMUSG00000037953	333424	Q14BT6	Catalyzes the transfer of N-acetylglucosamine (GlcNAc) to core 2 branched O-glycans. Necessary for the synthesis of type III mucin which is specifically produced in the stomach, duodenum, and pancreatic duct. May protect against inflammation-associated gastric adenocarcinoma. {ECO:0000269|PubMed:22307328}.	Protein modification; protein glycosylation. {ECO:0000269|PubMed:22307328}.	glycoprotein biosynthetic process [GO:0009101]; negative regulation of epithelial cell proliferation [GO:0050680]; protein O-linked glycosylation [GO:0006493]	acetylglucosaminyltransferase activity [GO:0008375]; hexosyltransferase activity [GO:0016758]	Glycosyltransferase 32 family		0.000337107	0.000800629	Porphyrin metabolism	EHMN	Porphyrin metabolism	UGT1A10; KL	9365; 54575	34	34		p-value	q-value	pathway	source	external_id	members_input_overlap	members_input_overlap_geneids	size	effective_size
Mfng	current symbol	MGI:1095404	Mfng	MFNG O-fucosylpeptide 3-beta-N-acetylglucosaminyltransferase	protein coding gene	ENSMUSG00000018169	17305	O09008	Glycosyltransferase that initiates the elongation of O-linked fucose residues attached to EGF-like repeats in the extracellular domain of Notch molecules. Modulates NOTCH1 activity by modifying O-fucose residues at specific EGF-like domains resulting in inhibition of NOTCH1 activation by JAG1 and enhancement of NOTCH1 activation by DLL1 via an increase in its binding to DLL1. {ECO:0000269|PubMed:…	0	blastocyst formation [GO:0001825]; marginal zone B cell differentiation [GO:0002315]; pattern specification process [GO:0007389]; positive regulation of Notch signaling pathway [GO:0045747]; positive regulation of protein binding [GO:0032092]; regulation of Notch signaling pathway [GO:0008593]	acetylglucosaminyltransferase activity [GO:0008375]; metal ion binding [GO:0046872]; O-fucosylpeptide 3-beta-N-acetylglucosaminyltransferase activity [GO:0033829]	Glycosyltransferase 31 family		0.000337107	0.000800629	Pentose and glucuronate interconversions - Homo sapiens (human)	KEGG	path:hsa00040	UGT1A10; KL	9365; 54575	34	34		3.96452e-15	3.17162e-13	Glycosaminoglycan metabolism	Reactome	R-HSA-1630316	DSEL; EXT2; SDC1; HEXB; OGN; SLC35B2; HS6ST2; B3GAT3; B3GAT2; CHST5; KERA	26229; 23563; 347734; 6382; 4969; 2132; 11081; 135152; 90161; 3074; 92126	119	119
Rfng	current symbol	MGI:894275	Rfng	RFNG O-fucosylpeptide 3-beta-N-acetylglucosaminyltransferase	protein coding gene	ENSMUSG00000025158	19719	O09009	Glycosyltransferase that initiates the elongation of O-linked fucose residues attached to EGF-like repeats in the extracellular domain of Notch molecules. Modulates NOTCH1 activity by modifying O-fucose residues at specific EGF-like domains resulting in enhancement of NOTCH1 activation by DLL1 and JAG1 (PubMed:28089369). May be involved in limb formation and in neurogenesis (By similarity). {ECO:…	0	cell differentiation [GO:0030154]; negative regulation of Notch signaling pathway [GO:0045746]; nervous system development [GO:0007399]; pattern specification process [GO:0007389]; positive regulation of Notch signaling pathway [GO:0045747]; positive regulation of protein binding [GO:0032092]; regulation of Notch signaling pathway [GO:0008593]	acetylglucosaminyltransferase activity [GO:0008375]; metal ion binding [GO:0046872]; O-fucosylpeptide 3-beta-N-acetylglucosaminyltransferase activity [GO:0033829]	Glycosyltransferase 31 family		0.000916341	0.0019345	ECM proteoglycans	Reactome	R-HSA-3000178	DCN; ASPN	1634; 54829	56	56		2.29034e-12	9.16135e-11	Metabolism of carbohydrates	Reactome	R-HSA-71387	DSEL; HEXB; EXT2; SLC35B2; SDC1; HK1; OGN; HS6ST2; B3GAT3; B3GAT2; CHST5; KERA	26229; 23563; 6382; 4969; 11081; 92126; 2132; 3098; 347734; 135152; 90161; 3074	285	284
Lfng	current symbol	MGI:1095413	Lfng	LFNG O-fucosylpeptide 3-beta-N-acetylglucosaminyltransferase	protein coding gene	ENSMUSG00000029570	16848	O09010	Glycosyltransferase that initiates the elongation of O-linked fucose residues attached to EGF-like repeats in the extracellular domain of Notch molecules. Modulates NOTCH1 activity by modifying O-fucose residues at specific EGF-like domains resulting in inhibition of NOTCH1 activation by JAG1 and enhancement of NOTCH1 activation by DLL1 via an increase in its binding to DLL1 (PubMed:28089369). De…	0	compartment pattern specification [GO:0007386]; marginal zone B cell differentiation [GO:0002315]; negative regulation of Notch signaling pathway involved in somitogenesis [GO:1902367]; ovarian follicle development [GO:0001541]; positive regulation of meiotic cell cycle [GO:0051446]; positive regulation of Notch signaling pathway [GO:0045747]; positive regulation of protein binding [GO:0032092]; …	acetylglucosaminyltransferase activity [GO:0008375]; metal ion binding [GO:0046872]; O-fucosylpeptide 3-beta-N-acetylglucosaminyltransferase activity [GO:0033829]	Glycosyltransferase 31 family		0.00138785	0.00263691	Glycosphingolipid metabolism	EHMN	Glycosphingolipid metabolism	ST8SIA1; GALC	2581; 6489	69	69		8.11112e-08	2.16297e-06	Post-translational protein modification	Reactome	R-HSA-597592	FBXO44; B3GALNT2; GALNT13; ALG3; CALR; B3GNT9; DPM2; FBXO2; EDEM2; FBXO6; GFPT2; MPI; LMAN2L; GALNT6; MAN1A2; ARSA	93611; 10905; 148789; 11226; 9945; 8818; 26270; 410; 811; 114805; 26232; 10195; 4351; 81562; 55741; 84752	1425	1425
Gcnt2	current symbol	MGI:1100870	Gcnt2	glucosaminyl (N-acetyl) transferase 2, I-branching enzyme	protein coding gene	ENSMUSG00000021360	14538	P97402	Branching enzyme that converts linear into branched poly-N-acetyllactosaminoglycans. Introduces the blood group I antigen during embryonic development. It is closely associated with the development and maturation of erythroid cells.	Protein modification; protein glycosylation.	maintenance of lens transparency [GO:0036438]; negative regulation of cell-substrate adhesion [GO:0010812]; positive regulation of cell migration [GO:0030335]; positive regulation of cell population proliferation [GO:0008284]; positive regulation of epithelial to mesenchymal transition [GO:0010718]; positive regulation of ERK1 and ERK2 cascade [GO:0070374]; positive regulation of heterotypic cell…	acetylglucosaminyltransferase activity [GO:0008375]; N-acetyllactosaminide beta-1,6-N-acetylglucosaminyltransferase activity [GO:0008109]	Glycosyltransferase 14 family		0.00224543	0.00387847	Signaling by FGFR	Reactome	R-HSA-190236	GALNT3; KL	9365; 2591	88	88		1.2102e-07	2.38734e-06	Amino sugar and nucleotide sugar metabolism - Homo sapiens (human)	KEGG	path:hsa00520	UGDH; HK1; HEXB; GFPT2; MPI	3074; 3098; 7358; 9945; 4351	48	48
Anxa6	current symbol	MGI:88255	Anxa6	annexin A6	protein coding gene	ENSMUSG00000018340	11749	P14824	May associate with CD21. May regulate the release of Ca(2+) from intracellular stores.	0	apoptotic signaling pathway [GO:0097190]; calcium ion transport [GO:0006816]; growth plate cartilage chondrocyte differentiation [GO:0003418]; ion transmembrane transport [GO:0034220]; mitochondrial calcium ion homeostasis [GO:0051560]; negative regulation of sequestering of calcium ion [GO:0051283]; neural crest cell migration [GO:0001755]; plasma membrane repair [GO:0001778]; regulation of musc…	actin filament binding [GO:0051015]; calcium channel activity [GO:0005262]; calcium-dependent phospholipid binding [GO:0005544]; calcium-dependent protein binding [GO:0048306]; calcium ion binding [GO:0005509]; cholesterol binding [GO:0015485]; chondroitin sulfate binding [GO:0035374]; GTP binding [GO:0005525]; identical protein binding [GO:0042802]; ligand-gated ion channel activity [GO:0015276]…	Annexin family												1.49208e-07	2.38734e-06	Chondroitin sulfate/dermatan sulfate metabolism	Reactome	R-HSA-1793185	B3GAT3; SDC1; HEXB; DSEL; B3GAT2	26229; 6382; 135152; 3074; 92126	50	50
Tgfbr3	current symbol	MGI:104637	Tgfbr3	transforming growth factor, beta receptor III	protein coding gene	ENSMUSG00000029287	21814	O88393	Binds to TGF-beta. Could be involved in capturing and retaining TGF-beta for presentation to the signaling receptors (By similarity). {ECO:0000250}.	0	angiogenesis [GO:0001525]; blastocyst development [GO:0001824]; blood vessel development [GO:0001568]; blood vessel diameter maintenance [GO:0097746]; blood vessel remodeling [GO:0001974]; BMP signaling pathway [GO:0030509]; cardiac epithelial to mesenchymal transition [GO:0060317]; cardiac muscle cell proliferation [GO:0060038]; cell migration [GO:0016477]; collagen metabolic process [GO:0032963…	activin binding [GO:0048185]; coreceptor activity [GO:0015026]; fibroblast growth factor binding [GO:0017134]; glycosaminoglycan binding [GO:0005539]; heparin binding [GO:0008201]; PDZ domain binding [GO:0030165]; SMAD binding [GO:0046332]; transforming growth factor beta-activated receptor activity [GO:0005024]; transforming growth factor beta binding [GO:0050431]; transforming growth factor bet…	0		Ketamine Treatment - Striatal Tissue-1hr										2.21112e-07	2.94816e-06	Heparan sulfate/heparin (HS-GAG) metabolism	Reactome	R-HSA-1638091	B3GAT3; B3GAT2; EXT2; HS6ST2; SDC1	2132; 26229; 135152; 90161; 6382	54	54
Hgsnat	current symbol	MGI:1196297	Hgsnat	heparan-alpha-glucosaminide N-acetyltransferase	protein coding gene	ENSMUSG00000037260	52120	Q3UDW8	Lysosomal acetyltransferase that acetylates the non-reducing terminal alpha-glucosamine residue of intralysosomal heparin or heparan sulfate, converting it into a substrate for luminal alpha-N-acetyl glucosaminidase. {ECO:0000269|PubMed:16960811}.	0	lysosomal transport [GO:0007041]; protein complex oligomerization [GO:0051259]	acyltransferase activity [GO:0016746]; heparan-alpha-glucosaminide N-acetyltransferase activity [GO:0015019]	0		p-value	q-value	pathway	source	external_id	members_input_overlap	members_input_overlap_geneids	size	effective_size		3.96455e-07	4.53091e-06	Asparagine N-linked glycosylation	Reactome	R-HSA-446203	ALG3; CALR; MPI; EDEM2; GFPT2; LMAN2L; DPM2; MAN1A2	8818; 81562; 10195; 55741; 9945; 10905; 4351; 811	283	283
Papss1	current symbol	MGI:1330587	Papss1	3'-phosphoadenosine 5'-phosphosulfate synthase 1	protein coding gene	ENSMUSG00000028032	23971	Q60967	Bifunctional enzyme with both ATP sulfurylase and APS kinase activity, which mediates two steps in the sulfate activation pathway. The first step is the transfer of a sulfate group to ATP to yield adenosine 5'-phosphosulfate (APS), and the second step is the transfer of a phosphate group from ATP to APS yielding 3'-phosphoadenylylsulfate (PAPS: activated sulfate donor used by sulfotransferase). I…	Sulfur metabolism; sulfate assimilation. {ECO:0000269|PubMed:7493984}.	3'-phosphoadenosine 5'-phosphosulfate biosynthetic process [GO:0050428]; sulfate assimilation [GO:0000103]	adenylylsulfate kinase activity [GO:0004020]; ATP binding [GO:0005524]; nucleotidyltransferase activity [GO:0016779]; protein homodimerization activity [GO:0042803]; sulfate adenylyltransferase (ATP) activity [GO:0004781]	APS kinase family; Sulfate adenylyltransferase family		0.000143368	0.000831878	Post-translational protein modification	Reactome	R-HSA-597592	B3GALNT2; PIGL; ALG6; PIGT; MGAT5; POMGNT1; CHST4	29929; 51604; 9487; 148789; 55624; 4249; 10164	1425	1425		7.76501e-07	7.76501e-06	heparan sulfate biosynthesis	HumanCyc	PWY-6564	B3GAT3; B3GAT2; EXT2; HS6ST2	2132; 26229; 135152; 90161	29	29
Papss2	current symbol	MGI:1330223	Papss2	3'-phosphoadenosine 5'-phosphosulfate synthase 2	protein coding gene	ENSMUSG00000024899	23972	O88428	Bifunctional enzyme with both ATP sulfurylase and APS kinase activity, which mediates two steps in the sulfate activation pathway. The first step is the transfer of a sulfate group to ATP to yield adenosine 5'-phosphosulfate (APS), and the second step is the transfer of a phosphate group from ATP to APS yielding 3'-phosphoadenylylsulfate/PAPS, the activated sulfate donor used by sulfotransferases…	Sulfur metabolism; sulfate assimilation. {ECO:0000305|PubMed:10559207}.	3'-phosphoadenosine 5'-phosphosulfate biosynthetic process [GO:0050428]; blood coagulation [GO:0007596]; bone development [GO:0060348]; sulfate assimilation [GO:0000103]	adenylylsulfate kinase activity [GO:0004020]; ATP binding [GO:0005524]; nucleotidyltransferase activity [GO:0016779]; sulfate adenylyltransferase (ATP) activity [GO:0004781]	APS kinase family; Sulfate adenylyltransferase family		0.000164182	0.000831878	O-linked glycosylation	Reactome	R-HSA-5173105	POMGNT1; CHST4; B3GALNT2	10164; 148789; 55624	115	115		1.32828e-06	1.18069e-05	Keratan sulfate/keratin metabolism	Reactome	R-HSA-1638074	OGN; HEXB; CHST5; KERA	23563; 3074; 11081; 4969	33	33
Gck	current symbol	MGI:1270854	Gck	glucokinase	protein coding gene	ENSMUSG00000041798	103988	P52792	Catalyzes the phosphorylation of hexose, such as D-glucose, D-fructose and D-mannose, to hexose 6-phosphate (D-glucose 6-phosphate, D-fructose 6-phosphate and D-mannose 6-phosphate, respectively) (PubMed:8530440). Compared to other hexokinases, has a weak affinity for D-glucose, and is effective only when glucose is abundant (By similarity). Mainly expressed in pancreatic beta cells and the liver…	Carbohydrate metabolism; hexose metabolism. {ECO:0000305|PubMed:8530440}.; Carbohydrate degradation; glycolysis; D-glyceraldehyde 3-phosphate and glycerone phosphate from D-glucose: step 1/4. {ECO:0000305|PubMed:8530440}.	calcium ion import [GO:0070509]; carbohydrate phosphorylation [GO:0046835]; cellular glucose homeostasis [GO:0001678]; cellular response to glucose starvation [GO:0042149]; cellular response to insulin stimulus [GO:0032869]; cellular response to leptin stimulus [GO:0044320]; detection of glucose [GO:0051594]; fructose 2,6-bisphosphate metabolic process [GO:0006003]; fructose 6-phosphate metabolic…	ADP binding [GO:0043531]; ATP binding [GO:0005524]; fructokinase activity [GO:0008865]; glucokinase activity [GO:0004340]; glucose binding [GO:0005536]; hexokinase activity [GO:0004396]; magnesium ion binding [GO:0000287]; mannokinase activity [GO:0019158]; protein phosphatase binding [GO:0019903]	Hexokinase family		0.000216215	0.000831878	Mannose type O-glycan biosynthesis - Homo sapiens (human)	KEGG	path:hsa00515	POMGNT1; B3GALNT2	148789; 55624	23	23		5.34487e-06	4.2759e-05	Metabolism of proteins	Reactome	R-HSA-392499	FBXO44; B3GALNT2; GALNT13; ALG3; CALR; B3GNT9; DPM2; FBXO2; EDEM2; FBXO6; GFPT2; MPI; LMAN2L; GALNT6; MAN1A2; ARSA	93611; 10905; 148789; 11226; 9945; 8818; 26270; 410; 811; 114805; 26232; 10195; 4351; 81562; 55741; 84752	1935	1934
Lgals3	current symbol	MGI:96778	Lgals3	lectin, galactose binding, soluble 3	protein coding gene	ENSMUSG00000050335	16854	P16110	Galactose-specific lectin which binds IgE. May mediate with the alpha-3, beta-1 integrin the stimulation by CSPG4 of endothelial cells migration. Together with DMBT1, required for terminal differentiation of columnar epithelial cells during early embryogenesis. In the nucleus: acts as a pre-mRNA splicing factor. Involved in acute inflammatory responses including neutrophil activation and adhesion…	0	antimicrobial humoral immune response mediated by antimicrobial peptide [GO:0061844]; cell differentiation [GO:0030154]; eosinophil chemotaxis [GO:0048245]; extracellular matrix organization [GO:0030198]; innate immune response [GO:0045087]; killing of cells of other organism [GO:0031640]; macrophage chemotaxis [GO:0048246]; monocyte chemotaxis [GO:0002548]; mononuclear cell migration [GO:0071674…	advanced glycation end-product receptor activity [GO:0050785]; chemoattractant activity [GO:0042056]; disaccharide binding [GO:0048030]; Fc-gamma receptor I complex binding [GO:0034988]; IgE binding [GO:0019863]; laminin binding [GO:0043236]; monosaccharide binding [GO:0048029]; oligosaccharide binding [GO:0070492]; protein phosphatase binding [GO:0019903]	0		0.000277293	0.000831878	Glycosylphosphatidylinositol (GPI)-anchor biosynthesis - Homo sapiens (human)	KEGG	path:hsa00563	PIGT; PIGL	9487; 51604	26	26		1.17769e-05	8.56503e-05	Proteoglycan biosynthesis	Wikipathways	WP4784	B3GAT3; SLC35B2; EXT2	347734; 2132; 26229	18	18
Dpm1	current symbol	MGI:1330239	Dpm1	dolichol-phosphate (beta-D) mannosyltransferase 1	protein coding gene	ENSMUSG00000078919	13480	O70152	Transfers mannose from GDP-mannose to dolichol monophosphate to form dolichol phosphate mannose (Dol-P-Man) which is the mannosyl donor in pathways leading to N-glycosylation, glycosyl phosphatidylinositol membrane anchoring, and O-mannosylation of proteins; catalytic subunit of the dolichol-phosphate mannose (DPM) synthase complex. {ECO:0000250}.	Protein modification; protein glycosylation.	dolichol metabolic process [GO:0019348]; GDP-mannose metabolic process [GO:0019673]; GPI anchor biosynthetic process [GO:0006506]; protein mannosylation [GO:0035268]; protein O-linked mannosylation [GO:0035269]	alcohol binding [GO:0043178]; dolichyl-phosphate beta-D-mannosyltransferase activity [GO:0004582]; dolichyl-phosphate-mannose-protein mannosyltransferase activity [GO:0004169]; mannose binding [GO:0005537]	Glycosyltransferase 2 family		0.000978821	0.00206315	Metabolism of proteins	Reactome	R-HSA-392499	B3GALNT2; PIGL; ALG6; PIGT; MGAT5; POMGNT1; CHST4	29929; 51604; 9487; 148789; 55624; 4249; 10164	1935	1934		1.63962e-05	0.000109308	Aminosugars metabolism	INOH	None	GFPT2; HK1; MPI	3098; 9945; 4351	20	20
Galm	current symbol	MGI:2442420	Galm	galactose mutarotase	protein coding gene	ENSMUSG00000035473	319625	Q8K157	Mutarotase that catalyzes the interconversion of beta-D-galactose and alpha-D-galactose during galactose metabolism. Beta-D-galactose is metabolized in the liver into glucose 1-phosphate, the primary metabolic fuel, by the action of four enzymes that constitute the Leloir pathway: GALM, GALK1 (galactokinase), GALT (galactose-1-phosphate uridylyltransferase) and GALE (UDP-galactose-4'-epimerase). …	Carbohydrate metabolism; hexose metabolism. {ECO:0000250|UniProtKB:Q96C23}.; Carbohydrate metabolism; galactose metabolism. {ECO:0000250|UniProtKB:Q96C23}.	carbohydrate metabolic process [GO:0005975]; galactose catabolic process via UDP-galactose [GO:0033499]; galactose metabolic process [GO:0006012]; glucose metabolic process [GO:0006006]	aldose 1-epimerase activity [GO:0004034]; carbohydrate binding [GO:0030246]	Aldose epimerase family		0.00103158	0.00206315	N-Glycan biosynthesis - Homo sapiens (human)	KEGG	path:hsa00510	ALG6; MGAT5	29929; 4249	50	50		2.89096e-05	0.000177905	Glycosaminoglycan biosynthesis - heparan sulfate / heparin - Homo sapiens (human)	KEGG	path:hsa00534	B3GAT3; EXT2; HS6ST2	90161; 2132; 26229	24	24
Fut2	current symbol	MGI:109374	Fut2	fucosyltransferase 2	protein coding gene	ENSMUSG00000055978	14344	Q9JL27	Catalyzes the transfer of L-fucose, from a guanosine diphosphate-beta-L-fucose, to the terminal galactose on both O- and N-linked glycans chains of cell surface glycoproteins and glycolipids and the resulting epitope regulates several processes such as cell-cell interaction including host-microbe interaction, cell surface expression and cell proliferation (PubMed:11018479, PubMed:11368156, PubMed…	Protein modification; protein glycosylation. {ECO:0000269|PubMed:11323419}.	carbohydrate metabolic process [GO:0005975]; fucosylation [GO:0036065]; glycolipid metabolic process [GO:0006664]; protein glycosylation [GO:0006486]; regulation of cell adhesion [GO:0030155]; regulation of endothelial cell proliferation [GO:0001936]	alpha-(1,2)-fucosyltransferase activity [GO:0031127]; fucosyltransferase activity [GO:0008417]; galactoside 2-alpha-L-fucosyltransferase activity [GO:0008107]	Glycosyltransferase 11 family		0.0022847	0.00391664	Metabolism of carbohydrates	Reactome	R-HSA-71387	NDST1; CHPF; MAN2B1	3340; 4125; 79586	285	284		3.70085e-05	0.000211477	A tetrasaccharide linker sequence is required for GAG synthesis	Reactome	R-HSA-1971475	B3GAT3; B3GAT2; SDC1	26229; 135152; 6382	26	26
Fut1	current symbol	MGI:109375	Fut1	fucosyltransferase 1	protein coding gene	ENSMUSG00000008461	14343	O09160	Catalyzes the transfer of L-fucose, from a guanosine diphosphate-beta-L-fucose, to the terminal galactose residue of glycoconjugates through an alpha(1,2) linkage leading to H antigen synthesis that is an intermediate substrate in the synthesis of ABO blood group antigens (PubMed:11368156, PubMed:14967068, PubMed:16884711). H antigen is essential for maturation of the glomerular layer of the main…	Protein modification; protein glycosylation. {ECO:0000250|UniProtKB:P19526}.	carbohydrate metabolic process [GO:0005975]; fucosylation [GO:0036065]; olfactory bulb development [GO:0021772]; positive regulation of cell-matrix adhesion [GO:0001954]; positive regulation of endothelial cell-matrix adhesion via fibronectin [GO:1904906]; positive regulation of endothelial cell migration [GO:0010595]; positive regulation of sprouting angiogenesis [GO:1903672]; protein glycosylat…	alpha-(1,2)-fucosyltransferase activity [GO:0031127]; galactoside 2-alpha-L-fucosyltransferase activity [GO:0008107]	Glycosyltransferase 11 family		0.00359352	0.00539028	Post-translational modification: synthesis of GPI-anchored proteins	Reactome	R-HSA-163125	PIGL; PIGT	51604; 9487	94	94		4.06055e-05	0.000216563	Biosynthesis of the N-glycan precursor (dolichol lipid-linked oligosaccharide, LLO) and transfer to a nascent protein	Reactome	R-HSA-446193	ALG3; GFPT2; DPM2; MPI	10195; 8818; 4351; 9945	77	77
Fut10	current symbol	MGI:2384748	Fut10	fucosyltransferase 10	protein coding gene	ENSMUSG00000046152	171167	Q5F2L2	Probable fucosyltransferase. {ECO:0000250}.	Protein modification; protein glycosylation.	cerebral cortex radially oriented cell migration [GO:0021799]; fucosylation [GO:0036065]; neuronal stem cell population maintenance [GO:0097150]; protein glycosylation [GO:0006486]	alpha-(1->3)-fucosyltransferase activity [GO:0046920]	Glycosyltransferase 10 family		0.005694	0.007592	Glycosaminoglycan metabolism	Reactome	R-HSA-1630316	NDST1; CHPF	3340; 79586	119	119		4.64696e-05	0.000232348	Keratan sulfate biosynthesis	Reactome	R-HSA-2022854	OGN; CHST5; KERA	23563; 11081; 4969	28	28
Fut11	current symbol	MGI:1920318	Fut11	fucosyltransferase 11	protein coding gene	ENSMUSG00000039357	73068	Q8BHC9	Probable fucosyltransferase. {ECO:0000250}.	Protein modification; protein glycosylation.	fucosylation [GO:0036065]; protein glycosylation [GO:0006486]	alpha-(1->3)-fucosyltransferase activity [GO:0046920]	Glycosyltransferase 10 family												5.73917e-05	0.000253724	Proteoglycan biosynthesis	EHMN	Proteoglycan biosynthesis	B3GAT3; B3GAT2; EXT2	2132; 26229; 135152	30	30
Fut8	current symbol	MGI:1858901	Fut8	fucosyltransferase 8	protein coding gene	ENSMUSG00000021065	53618	Q9WTS2	Catalyzes the addition of fucose in alpha 1-6 linkage to the first GlcNAc residue, next to the peptide chains in N-glycans. {ECO:0000250}.	Protein modification; protein glycosylation.	cell migration [GO:0016477]; GDP-L-fucose metabolic process [GO:0046368]; integrin-mediated signaling pathway [GO:0007229]; N-glycan fucosylation [GO:0036071]; N-glycan processing [GO:0006491]; protein glycosylation in Golgi [GO:0033578]; protein N-linked glycosylation [GO:0006487]; protein N-linked glycosylation via asparagine [GO:0018279]; receptor metabolic process [GO:0043112]; regulation of …	alpha-(1->6)-fucosyltransferase activity [GO:0046921]; glycoprotein 6-alpha-L-fucosyltransferase activity [GO:0008424]; glycosyltransferase activity [GO:0016757]; SH3 domain binding [GO:0017124]	Glycosyltransferase 23 family		Ketamine Treatment - Prelimbic Cortex										5.73917e-05	0.000253724	Fructose Mannose metabolism	INOH	None	GFPT2; HK1; MPI	3098; 4351; 9945	30	30
Alg9	current symbol	MGI:1924753	Alg9	asparagine-linked glycosylation 9 (alpha 1,2 mannosyltransferase)	protein coding gene	ENSMUSG00000032059	102580	Q8VDI9	Catalyzes the transfer of mannose from Dol-P-Man to lipid-linked oligosaccharides. {ECO:0000250|UniProtKB:Q9H6U8}.	Protein modification; protein glycosylation. {ECO:0000250|UniProtKB:Q9H6U8}.	protein N-linked glycosylation [GO:0006487]	alpha-1,2-mannosyltransferase activity [GO:0000026]; dol-P-Man:Man(6)GlcNAc(2)-PP-Dol alpha-1,2-mannosyltransferase activity [GO:0052926]; dol-P-Man:Man(8)GlcNAc(2)-PP-Dol alpha-1,2-mannosyltransferase activity [GO:0052918]; mannosyltransferase activity [GO:0000030]	Glycosyltransferase 22 family		p-value	q-value	pathway	source	external_id	members_input_overlap	members_input_overlap_geneids	size	effective_size		6.32448e-05	0.000253724	Protein processing in endoplasmic reticulum - Homo sapiens (human)	KEGG	path:hsa04141	FBXO6; FBXO2; EDEM2; CALR; MAN1A2	26232; 10905; 811; 55741; 26270	171	170
Pigb	current symbol	MGI:1891825	Pigb	phosphatidylinositol glycan anchor biosynthesis, class B	protein coding gene	ENSMUSG00000079469	55981	Q9JJQ0	Mannosyltransferase involved in glycosylphosphatidylinositol-anchor biosynthesis. Transfers the third alpha-1,2-mannose to Man2-GlcN-acyl-PI during GPI precursor assembly (By similarity). {ECO:0000250}.	Glycolipid biosynthesis; glycosylphosphatidylinositol-anchor biosynthesis.	GPI anchor biosynthetic process [GO:0006506]; GPI anchor metabolic process [GO:0006505]; mannosylation [GO:0097502]	alpha-1,2-mannosyltransferase activity [GO:0000026]; glycolipid mannosyltransferase activity [GO:0004376]; mannosyltransferase activity [GO:0000030]	Glycosyltransferase 22 family, PIGB subfamily		8.25693e-11	1.24214e-09	Heparan sulfate/heparin (HS-GAG) metabolism	Reactome	R-HSA-1638091	HS3ST3A1; NDST4; BGN; GPC3; HS3ST3B1; HS6ST2	9955; 633; 90161; 9953; 64579; 2719	54	54		6.34309e-05	0.000253724	HS-GAG biosynthesis	Reactome	R-HSA-2022928	SDC1; EXT2; HS6ST2	2132; 90161; 6382	31	31
Pigz	current symbol	MGI:2443822	Pigz	phosphatidylinositol glycan anchor biosynthesis, class Z	protein coding gene	ENSMUSG00000045625	239827	Q8BTP0	Mannosyltransferase involved in glycosylphosphatidylinositol-anchor biosynthesis. Transfers a fourth mannose to some trimannosyl-GPIs during GPI precursor assembly. The presence of a fourth mannose in GPI is facultative and only scarcely detected, suggesting that it only exists in some tissues (By similarity). {ECO:0000250}.	Glycolipid biosynthesis; glycosylphosphatidylinositol-anchor biosynthesis.	GPI anchor biosynthetic process [GO:0006506]	alpha-1,2-mannosyltransferase activity [GO:0000026]; mannosyltransferase activity [GO:0000030]	Glycosyltransferase 22 family, PIGZ subfamily		8.28096e-11	1.24214e-09	heparan sulfate biosynthesis (late stages)	HumanCyc	PWY-6558	EXTL1; HS3ST3A1; HS3ST3B1; HS6ST2; NDST4	9955; 90161; 2134; 9953; 64579	22	22		0.000127192	0.000471032	Various types of N-glycan biosynthesis - Homo sapiens (human)	KEGG	path:hsa00513	ALG3; HEXB; MAN1A2	3074; 10905; 10195	39	39
Abo	current symbol	MGI:2135738	Abo	ABO blood group (transferase A, alpha 1-3-N-acetylgalactosaminyltransferase, transferase B, alpha 1-3-galactosyltransferase)	protein coding gene	ENSMUSG00000015787	80908	P38649	0	Protein modification; protein glycosylation. {ECO:0000250|UniProtKB:P16442}.	carbohydrate metabolic process [GO:0005975]; lipid glycosylation [GO:0030259]; protein glycosylation [GO:0006486]	alpha-1,3-galactosyltransferase activity [GO:0001962]; antigen binding [GO:0003823]; fucosylgalactoside 3-alpha-galactosyltransferase activity [GO:0004381]; glycoprotein-fucosylgalactoside alpha-N-acetylgalactosaminyltransferase activity [GO:0004380]; glycosyltransferase activity [GO:0016757]; manganese ion binding [GO:0030145]; nucleotide binding [GO:0000166]	Glycosyltransferase 6 family		1.33425e-10	1.33425e-09	Glycosaminoglycan biosynthesis - heparan sulfate / heparin - Homo sapiens (human)	KEGG	path:hsa00534	EXTL1; HS3ST3A1; NDST4; HS3ST3B1; HS6ST2	90161; 64579; 2134; 9953; 9955	24	24		0.000129534	0.000471032	glycoaminoglycan-protein linkage region biosynthesis	HumanCyc	PWY-6557	B3GAT3; B3GAT2	26229; 135152	7	7
A3galt2	current symbol	MGI:2685279	A3galt2	alpha 1,3-galactosyltransferase 2 (isoglobotriaosylceramide synthase)	protein coding gene	ENSMUSG00000028794	215493	Q3V1N9	Synthesizes the galactose-alpha(1,3)-galactose group on the glycosphingolipid isoglobotrihexosylceramide or isogloboside 3 (iGb3) by catalyzing the transfer of galactose from UDP-Galactose to its acceptor molecule Gal-beta-1,4-Glc-ceramide. Can also catalyze the addition of galactose to iGb3 itself to form polygalactose structures. Synthesis of iGb3 is the initial step in the formation of the iso…	0	carbohydrate metabolic process [GO:0005975]; cellular response to manganese ion [GO:0071287]; glycosphingolipid biosynthetic process [GO:0006688]; lipid glycosylation [GO:0030259]	alpha-1,3-galactosyltransferase activity [GO:0001962]; glycosyltransferase activity [GO:0016757]; metal ion binding [GO:0046872]; N-acetyllactosaminide 3-alpha-galactosyltransferase activity [GO:0047276]	Glycosyltransferase 6 family		3.71169e-10	2.22701e-09	heparan sulfate biosynthesis	HumanCyc	PWY-6564	EXTL1; HS3ST3A1; HS3ST3B1; HS6ST2; NDST4	9955; 90161; 2134; 9953; 64579	29	29		0.000141148	0.00049095	Metabolism	Reactome	R-HSA-1430728	DSEL; HK1; EXT2; UGDH; SDC1; HEXB; OGN; SLC35B2; HS6ST2; B3GAT3; B3GAT2; KERA; CHST5; ARSA	7358; 26229; 347734; 92126; 2132; 90161; 3074; 135152; 6382; 410; 4969; 23563; 11081; 3098	1954	1952
Alg2	current symbol	MGI:1914731	Alg2	asparagine-linked glycosylation 2 (alpha-1,3-mannosyltransferase)	protein coding gene	ENSMUSG00000039740	56737	Q9DBE8	Mannosylates Man(2)GlcNAc(2)-dolichol diphosphate and Man(1)GlcNAc(2)-dolichol diphosphate to form Man(3)GlcNAc(2)-dolichol diphosphate. {ECO:0000250}.	Protein modification; protein glycosylation.	dolichol-linked oligosaccharide biosynthetic process [GO:0006488]; oligosaccharide-lipid intermediate biosynthetic process [GO:0006490]; protein glycosylation in endoplasmic reticulum [GO:0033577]; response to calcium ion [GO:0051592]	alpha-1,3-mannosyltransferase activity [GO:0000033]; calcium-dependent protein binding [GO:0048306]; GDP-Man:Man1GlcNAc2-PP-Dol alpha-1,3-mannosyltransferase activity [GO:0004378]; GDP-Man:Man2GlcNAc2-PP-dolichol alpha-1,6-mannosyltransferase activity [GO:0102704]; protein heterodimerization activity [GO:0046982]; protein N-terminus binding [GO:0047485]	Glycosyltransferase group 1 family, Glycosyltransferase 4 subfamily		3.71169e-10	2.22701e-09	mucin core 1 and core 2 <i>O</i>-glycosylation	HumanCyc	PWY-7433	GCNT4; GCNT1; GALNT9; GALNT10; GALNT3	50614; 2650; 55568; 51301; 2591	29	29		0.000193824	0.000646081	O-linked glycosylation	Reactome	R-HSA-5173105	GALNT6; B3GNT9; GALNT13; B3GALNT2	114805; 148789; 11226; 84752	115	115
Alg8	current symbol	MGI:2141959	Alg8	asparagine-linked glycosylation 8 (alpha-1,3-glucosyltransferase)	protein coding gene	ENSMUSG00000035704	381903	Q6P8H8	Adds the second glucose residue to the lipid-linked oligosaccharide precursor for N-linked glycosylation. Transfers glucose from dolichyl phosphate glucose (Dol-P-Glc) onto the lipid-linked oligosaccharide Glc(1)Man(9)GlcNAc(2)-PP-Dol before it is transferred to the nascent peptide (By similarity). Required for PKD1/Polycystin-1 maturation and localization to the plasma membrane of the primary ci…	Protein modification; protein glycosylation.	oligosaccharide-lipid intermediate biosynthetic process [GO:0006490]; protein N-linked glycosylation [GO:0006487]; protein N-linked glycosylation via asparagine [GO:0018279]	alpha-1,3-mannosyltransferase activity [GO:0000033]; dolichyl pyrophosphate Glc1Man9GlcNAc2 alpha-1,3-glucosyltransferase activity [GO:0042283]	ALG6/ALG8 glucosyltransferase family		5.30134e-10	2.65067e-09	HS-GAG biosynthesis	Reactome	R-HSA-2022928	NDST4; GPC3; HS3ST3A1; HS3ST3B1; HS6ST2	9955; 90161; 9953; 64579; 2719	31	31		0.000222574	0.000712236	Other types of O-glycan biosynthesis - Homo sapiens (human)	KEGG	path:hsa00514	PLOD3; GALNT6; GALNT13	8985; 11226; 114805	47	47
Alg3	current symbol	MGI:1098592	Alg3	asparagine-linked glycosylation 3 (alpha-1,3-mannosyltransferase)	protein coding gene	ENSMUSG00000033809	208624	Q8K2A8	Adds the first Dol-P-Man derived mannose in an alpha-1,3 linkage to Man5GlcNAc2-PP-Dol.	Protein modification; protein glycosylation.	protein glycosylation [GO:0006486]	alpha-1,3-mannosyltransferase activity [GO:0000033]; dol-P-Man:Man(5)GlcNAc(2)-PP-Dol alpha-1,3-mannosyltransferase activity [GO:0052925]	Glycosyltransferase 58 family		6.2776e-10	2.6904e-09	Mucin type O-glycan biosynthesis - Homo sapiens (human)	KEGG	path:hsa00512	GCNT4; GCNT1; GALNT9; GALNT10; GALNT3	55568; 2591; 50614; 2650; 51301	32	32		0.000267646	0.000818528	N-Glycan biosynthesis - Homo sapiens (human)	KEGG	path:hsa00510	ALG3; DPM2; MAN1A2	10905; 10195; 8818	50	50
Mgam	current symbol	MGI:1203495	Mgam	maltase-glucoamylase	protein coding gene	ENSMUSG00000068587	232714	A0A0J9YVE6	0	0	carbohydrate metabolic process [GO:0005975]	alpha-1,4-glucosidase activity [GO:0004558]; amylase activity [GO:0016160]; carbohydrate binding [GO:0030246]; hydrolase activity, hydrolyzing O-glycosyl compounds [GO:0004553]	Glycosyl hydrolase 31 family		1.0509e-08	3.94087e-08	Glycosaminoglycan metabolism	Reactome	R-HSA-1630316	HS3ST3A1; NDST4; BGN; GPC3; HS3ST3B1; HS6ST2	9955; 2719; 633; 90161; 9953; 64579	119	119		0.000276253	0.000818528	dolichyl-diphosphooligosaccharide biosynthesis	HumanCyc	MANNOSYL-CHITO-DOLICHOL-BIOSYNTHESIS	ALG3; DPM2	8818; 10195	10	10
Gaa	current symbol	MGI:95609	Gaa	glucosidase, alpha, acid	protein coding gene	ENSMUSG00000025579	14387	P70699	Essential for the degradation of glycogen in lysosomes. Has highest activity on alpha-1,4-linked glycosidic linkages, but can also hydrolyze alpha-1,6-linked glucans. {ECO:0000250|UniProtKB:P10253}.	0	cardiac muscle contraction [GO:0060048]; diaphragm contraction [GO:0002086]; glycogen catabolic process [GO:0005980]; glycogen metabolic process [GO:0005977]; heart morphogenesis [GO:0003007]; locomotory behavior [GO:0007626]; lysosome organization [GO:0007040]; muscle cell cellular homeostasis [GO:0046716]; neuromuscular process controlling balance [GO:0050885]; neuromuscular process controlling…	alpha-1,4-glucosidase activity [GO:0004558]; carbohydrate binding [GO:0030246]; hydrolase activity, hydrolyzing O-glycosyl compounds [GO:0004553]; maltose alpha-glucosidase activity [GO:0032450]	Glycosyl hydrolase 31 family		2.7047e-08	9.01566e-08	O-linked glycosylation of mucins	Reactome	R-HSA-913709	GCNT4; GCNT1; GALNT9; GALNT10; GALNT3	2591; 2650; 55568; 51301; 50614	66	66		0.00053023	0.00151494	Synthesis of substrates in N-glycan biosythesis	Reactome	R-HSA-446219	GFPT2; DPM2; MPI	9945; 8818; 4351	63	63
Pigm	current symbol	MGI:1914806	Pigm	phosphatidylinositol glycan anchor biosynthesis, class M	protein coding gene	ENSMUSG00000050229	67556	Q8C2R7	Mannosyltransferase involved in glycosylphosphatidylinositol-anchor biosynthesis. Transfers the first alpha-1,4-mannose to GlcN-acyl-PI during GPI precursor assembly (By similarity). {ECO:0000250}.	Glycolipid biosynthesis; glycosylphosphatidylinositol-anchor biosynthesis.	GPI anchor biosynthetic process [GO:0006506]	alpha-1,4-mannosyltransferase activity [GO:0051751]; glycolipid mannosyltransferase activity [GO:0004376]; mannosyltransferase activity [GO:0000030]	PIGM family		1.63566e-07	4.90697e-07	O-Glycan biosynthesis	EHMN	O-Glycan biosynthesis	GCNT1; GALNT9; GALNT10; GALNT3	50614; 2650; 55568; 2591	36	36		0.000607842	0.0016768	O-linked glycosylation of mucins	Reactome	R-HSA-913709	GALNT6; GALNT13; B3GNT9	114805; 84752; 11226	66	66
Extl2	current symbol	MGI:1889574	Extl2	exostosin-like glycosyltransferase 2	protein coding gene	ENSMUSG00000027963	58193	Q9ES89	Glycosyltransferase required for the biosynthesis of heparan-sulfate and responsible for the alternating addition of beta-1-4-linked glucuronic acid (GlcA) and alpha-1-4-linked N-acetylglucosamine (GlcNAc) units to nascent heparan sulfate chains. {ECO:0000250}.	0	N-acetylglucosamine metabolic process [GO:0006044]; protein glycosylation [GO:0006486]; UDP-N-acetylgalactosamine metabolic process [GO:0019276]	alpha-1,4-N-acetylgalactosaminyltransferase activity [GO:0035248]; glucuronyl-galactosyl-proteoglycan 4-alpha-N-acetylglucosaminyltransferase activity [GO:0001888]; glucuronylgalactosylproteoglycan 4-beta-N-acetylgalactosaminyltransferase activity [GO:0047237]; glycosaminoglycan binding [GO:0005539]; manganese ion binding [GO:0030145]	Glycosyltransferase 47 family		4.45056e-07	1.21379e-06	O-linked glycosylation	Reactome	R-HSA-5173105	GCNT4; GCNT1; GALNT9; GALNT10; GALNT3	51301; 50614; 2650; 55568; 2591	115	115		0.000825675	0.00218215	dermatan sulfate biosynthesis	HumanCyc	PWY-6571	B3GAT3; B3GAT2	26229; 135152	17	17
Mgat2	current symbol	MGI:2384966	Mgat2	mannoside acetylglucosaminyltransferase 2	protein coding gene	ENSMUSG00000043998	217664	Q921V5	Plays an essential role in protein N-glycosylation. Catalyzes the transfer of N-acetylglucosamine (GlcNAc) onto the free terminal mannose moiety in the core structure of the nascent N-linked glycan chain, giving rise to the second branch in complex glycans. {ECO:0000269|PubMed:11805078}.	Protein modification; protein glycosylation. {ECO:0000250|UniProtKB:Q10469}.	oligosaccharide biosynthetic process [GO:0009312]; protein N-linked glycosylation [GO:0006487]; protein N-linked glycosylation via asparagine [GO:0018279]	alpha-1,6-mannosylglycoprotein 2-beta-N-acetylglucosaminyltransferase activity [GO:0008455]; carbohydrate binding [GO:0030246]; manganese ion binding [GO:0030145]; protein homodimerization activity [GO:0042803]	Glycosyltransferase 16 (GT16) protein family		4.90428e-07	1.22607e-06	Other types of O-glycan biosynthesis - Homo sapiens (human)	KEGG	path:hsa00514	MFNG; GALNT9; GALNT10; GALNT3	55568; 4242; 2591; 50614	47	47		0.000927412	0.00218215	Fructose intolerance, hereditary	SMPDB	SMP00725	HK1; MPI	3098; 4351	18	18
Mgat5b	current symbol	MGI:3606200	Mgat5b	mannoside acetylglucosaminyltransferase 5, isoenzyme B	protein coding gene	ENSMUSG00000043857	268510	Q765H6	Glycosyltransferase that acts on alpha-linked mannose of N-glycans and O-mannosyl glycans. Catalyzes the transfer of N-acetylglucosamine (GlcNAc) to the beta 1-6 linkage of the mannose residue of GlcNAc-beta1,2-Man-alpha on both the alpha1,3- and alpha1,6-linked mannose arms in the core structure of N-glycan (By similarity). Also acts on the GlcNAc-beta1,2-Man-alpha1-Ser/Thr moiety, forming a 2,6…	Protein modification; protein glycosylation. {ECO:0000269|PubMed:22715095}.	protein N-linked glycosylation [GO:0006487]; protein O-linked glycosylation via serine [GO:0018242]	alpha-1,6-mannosylglycoprotein 6-beta-N-acetylglucosaminyltransferase activity [GO:0030144]; manganese ion binding [GO:0030145]	Glycosyltransferase 18 family		1.82248e-06	4.20573e-06	Metabolism of carbohydrates	Reactome	R-HSA-71387	HS3ST3A1; NDST4; BGN; GPC3; HS3ST3B1; HS6ST2	9955; 2719; 633; 90161; 9953; 64579	285	284		0.000927412	0.00218215	Fructose and Mannose Degradation	SMPDB	SMP00064	HK1; MPI	3098; 4351	18	18
Alg12	current symbol	MGI:2385025	Alg12	asparagine-linked glycosylation 12 (alpha-1,6-mannosyltransferase)	protein coding gene	ENSMUSG00000035845	223774	Q8VDB2	Adds the eighth mannose residue in an alpha-1,6 linkage onto the dolichol-PP-oligosaccharide precursor (dolichol-PP-Man(7)GlcNAc(2)) required for protein glycosylation. {ECO:0000250}.	Protein modification; protein glycosylation.	dolichol-linked oligosaccharide biosynthetic process [GO:0006488]; protein N-linked glycosylation [GO:0006487]	alpha-1,6-mannosyltransferase activity [GO:0000009]; dolichyl-P-Man:Man(7)GlcNAc(2)-PP-dolichol alpha-1,6-mannosyltransferase [GO:0052917]; mannosyltransferase activity [GO:0000030]	Glycosyltransferase 22 family		5.69097e-05	0.000121949	Post-translational protein modification	Reactome	R-HSA-597592	GCNT4; GCNT1; GALNT10; MAN2A1; GPC3; GALNT9; MGAT4C; PIGZ; GALNT3	51301; 80235; 2591; 55568; 4124; 50614; 2650; 25834; 2719	1425	1425		0.000927412	0.00218215	Fructosuria	SMPDB	SMP00561	HK1; MPI	3098; 4351	18	18
Pigv	current symbol	MGI:2442480	Pigv	phosphatidylinositol glycan anchor biosynthesis, class V	protein coding gene	ENSMUSG00000043257	230801	Q7TPN3	Alpha-1,6-mannosyltransferase involved in glycosylphosphatidylinositol-anchor biosynthesis. Transfers the second mannose to the glycosylphosphatidylinositol during GPI precursor assembly (By similarity). {ECO:0000250}.	Glycolipid biosynthesis; glycosylphosphatidylinositol-anchor biosynthesis.	GPI anchor biosynthetic process [GO:0006506]	alpha-1,6-mannosyltransferase activity [GO:0000009]; glycolipid mannosyltransferase activity [GO:0004376]; mannosyltransferase activity [GO:0000030]	PIGV family		0.000117192	0.000234384	Metapathway biotransformation Phase I and II	Wikipathways	WP702	HS3ST3A1; NDST4; HS3ST3B1; HS6ST2	64579; 9955; 90161; 9953	186	186		0.000927412	0.00218215	er associated degradation (erad) pathway	BioCarta	eradpathway	FBXO2; MAN1A2	26232; 10905	18	18
Naga	current symbol	MGI:1261422	Naga	N-acetyl galactosaminidase, alpha	protein coding gene	ENSMUSG00000022453	17939	Q9QWR8	Removes terminal alpha-N-acetylgalactosamine residues from glycolipids and glycopeptides. Required for the breakdown of glycolipids. {ECO:0000250|UniProtKB:P17050}.	0	carbohydrate catabolic process [GO:0016052]; glycolipid catabolic process [GO:0019377]; glycoside catabolic process [GO:0016139]; glycosylceramide catabolic process [GO:0046477]; oligosaccharide metabolic process [GO:0009311]	alpha-galactosidase activity [GO:0004557]; alpha-N-acetylgalactosaminidase activity [GO:0008456]; protein homodimerization activity [GO:0042803]	Glycosyl hydrolase 27 family		0.000354654	0.000664977	HH-Ncore	Signalink	None	EXTL1; GPC3	2134; 2719	20	20		0.00126688	0.00258857	Glycosphingolipid biosynthesis - ganglioseries	EHMN	Glycosphingolipid biosynthesis - ganglioseries	GAL3ST1; HEXB	9514; 3074	21	21
Gla	current symbol	MGI:1347344	Gla	galactosidase, alpha	protein coding gene	ENSMUSG00000031266	11605	P51569	Catalyzes the hydrolysis of glycosphingolipids and participates in their degradation in the lysosome. {ECO:0000250|UniProtKB:P06280}.	0	glycoside catabolic process [GO:0016139]; glycosphingolipid catabolic process [GO:0046479]; glycosylceramide catabolic process [GO:0046477]; negative regulation of nitric oxide biosynthetic process [GO:0045019]; negative regulation of nitric-oxide synthase activity [GO:0051001]; oligosaccharide metabolic process [GO:0009311]	alpha-galactosidase activity [GO:0004557]; catalytic activity [GO:0003824]; galactoside binding [GO:0016936]; galactosylgalactosylglucosylceramidase activity [GO:0017041]; hydrolase activity [GO:0016787]; protein homodimerization activity [GO:0042803]; raffinose alpha-galactosidase activity [GO:0052692]; signaling receptor binding [GO:0005102]	Glycosyl hydrolase 27 family		0.000603584	0.000967381	A tetrasaccharide linker sequence is required for GAG synthesis	Reactome	R-HSA-1971475	GPC3; BGN	633; 2719	26	26		0.00126688	0.00258857	chondroitin sulfate biosynthesis	HumanCyc	PWY-6569	B3GAT3; B3GAT2	26229; 135152	21	21
Ganab	current symbol	MGI:1097667	Ganab	alpha glucosidase 2 alpha neutral subunit	protein coding gene	ENSMUSG00000071650	14376	Q8BHN3	Catalytic subunit of glucosidase II that cleaves sequentially the 2 innermost alpha-1,3-linked glucose residues from the Glc(2)Man(9)GlcNAc(2) oligosaccharide precursor of immature glycoproteins (PubMed:27462106). Required for PKD1/Polycystin-1 and PKD2/Polycystin-2 maturation and localization to the cell surface and cilia (PubMed:28375157). {ECO:0000269|PubMed:27462106, ECO:0000269|PubMed:283751…	Glycan metabolism; N-glycan metabolism. {ECO:0000269|PubMed:27462106}.	carbohydrate metabolic process [GO:0005975]; N-glycan processing [GO:0006491]	alpha-glucosidase activity [GO:0090599]; carbohydrate binding [GO:0030246]; glucan 1,3-alpha-glucosidase activity [GO:0033919]; glucosidase activity [GO:0015926]; hydrolase activity, hydrolyzing O-glycosyl compounds [GO:0004553]	Glycosyl hydrolase 31 family		0.000603584	0.000967381	N-glycan antennae elongation in the medial/trans-Golgi	Reactome	R-HSA-975576	MAN2A1; MGAT4C	25834; 4124	26	26		0.00139136	0.00258857	heparan sulfate biosynthesis (late stages)	HumanCyc	PWY-6558	EXT2; HS6ST2	2132; 90161	22	22
Fuca2	current symbol	MGI:1914098	Fuca2	fucosidase, alpha-L- 2, plasma	protein coding gene	ENSMUSG00000019810	66848	Q99KR8	Alpha-L-fucosidase is responsible for hydrolyzing the alpha-1,6-linked fucose joined to the reducing-end N-acetylglucosamine of the carbohydrate moieties of glycoproteins.	0	fucose metabolic process [GO:0006004]; glycoside catabolic process [GO:0016139]; regulation of entry of bacterium into host cell [GO:2000535]; response to bacterium [GO:0009617]	alpha-L-fucosidase activity [GO:0004560]	Glycosyl hydrolase 29 family		0.000612675	0.000967381	Metabolism of proteins	Reactome	R-HSA-392499	GCNT4; GCNT1; GALNT10; MAN2A1; GPC3; GALNT9; MGAT4C; PIGZ; GALNT3	50614; 51301; 80235; 2591; 55568; 4124; 2650; 25834; 2719	1935	1934		0.00139136	0.00258857	Sphingolipid Metabolism	SMPDB	SMP00034	GAL3ST1; ARSA	9514; 410	22	22
Fuca1	current symbol	MGI:95593	Fuca1	fucosidase, alpha-L- 1, tissue	protein coding gene	ENSMUSG00000028673	71665	Q99LJ1	Alpha-L-fucosidase is responsible for hydrolyzing the alpha-1,6-linked fucose joined to the reducing-end N-acetylglucosamine of the carbohydrate moieties of glycoproteins. {ECO:0000250}.	0	fucose metabolic process [GO:0006004]; glycoside catabolic process [GO:0016139]	alpha-L-fucosidase activity [GO:0004560]; carbohydrate binding [GO:0030246]; fucosidase activity [GO:0015928]	Glycosyl hydrolase 29 family		0.00136118	0.00204176	Various types of N-glycan biosynthesis - Homo sapiens (human)	KEGG	path:hsa00513	MGAT4C; MAN2A1	4124; 25834	39	39		0.00139136	0.00258857	Gaucher Disease	SMPDB	SMP00349	GAL3ST1; ARSA	9514; 410	22	22
Man2a1	current symbol	MGI:104669	Man2a1	mannosidase 2, alpha 1	protein coding gene	ENSMUSG00000024085	17158	P27046	Catalyzes the first committed step in the biosynthesis of complex N-glycans. It controls conversion of high mannose to complex N-glycans; the final hydrolytic step in the N-glycan maturation pathway. {ECO:0000250|UniProtKB:P28494}.	Protein modification; protein glycosylation.	in utero embryonic development [GO:0001701]; liver development [GO:0001889]; lung alveolus development [GO:0048286]; mannose metabolic process [GO:0006013]; mitochondrion organization [GO:0007005]; N-glycan processing [GO:0006491]; positive regulation of neurogenesis [GO:0050769]; protein deglycosylation [GO:0006517]; protein glycosylation [GO:0006486]; respiratory gaseous exchange by respiratory…	alpha-mannosidase activity [GO:0004559]; carbohydrate binding [GO:0030246]; hydrolase activity [GO:0016787]; hydrolase activity, hydrolyzing N-glycosyl compounds [GO:0016799]; identical protein binding [GO:0042802]; mannosidase activity [GO:0015923]; mannosyl-oligosaccharide 1,3-1,6-alpha-mannosidase activity [GO:0004572]; metal ion binding [GO:0046872]; protein homodimerization activity [GO:0042…	Glycosyl hydrolase 38 family		0.00157762	0.00225374	N-Glycan biosynthesis	EHMN	N-Glycan biosynthesis	MAN2A1; MGAT4C	25834; 4124	42	42		0.00139136	0.00258857	Globoid Cell Leukodystrophy	SMPDB	SMP00348	GAL3ST1; ARSA	9514; 410	22	22
Man2a2	current symbol	MGI:2150656	Man2a2	mannosidase 2, alpha 2	protein coding gene	ENSMUSG00000038886	140481	Q8BRK9	Catalyzes the first committed step in the biosynthesis of complex N-glycans. It controls conversion of high mannose to complex N-glycans; the final hydrolytic step in the N-glycan maturation pathway (By similarity). {ECO:0000250}.	Protein modification; protein glycosylation.	mannose metabolic process [GO:0006013]; N-glycan processing [GO:0006491]; protein deglycosylation [GO:0006517]; protein glycosylation [GO:0006486]	alpha-mannosidase activity [GO:0004559]; carbohydrate binding [GO:0030246]; hydrolase activity, hydrolyzing N-glycosyl compounds [GO:0016799]; mannosidase activity [GO:0015923]; mannosyl-oligosaccharide 1,3-1,6-alpha-mannosidase activity [GO:0004572]; metal ion binding [GO:0046872]	Glycosyl hydrolase 38 family		0.0022295	0.00290805	Chondroitin sulfate/dermatan sulfate metabolism	Reactome	R-HSA-1793185	GPC3; BGN	633; 2719	50	50		0.00139136	0.00258857	Metachromatic Leukodystrophy (MLD)	SMPDB	SMP00347	GAL3ST1; ARSA	9514; 410	22	22
Man2b2	current symbol	MGI:1195262	Man2b2	mannosidase 2, alpha B2	protein coding gene	ENSMUSG00000029119	17160	O54782	Plays an important role in the early step of spermatogenesis.	0	mannose metabolic process [GO:0006013]	alpha-mannosidase activity [GO:0004559]; carbohydrate binding [GO:0030246]; metal ion binding [GO:0046872]	Glycosyl hydrolase 38 family		0.0022295	0.00290805	N-Glycan biosynthesis - Homo sapiens (human)	KEGG	path:hsa00510	MGAT4C; MAN2A1	4124; 25834	50	50		0.00139136	0.00258857	Fabry disease	SMPDB	SMP00525	GAL3ST1; ARSA	9514; 410	22	22
Man2b1	current symbol	MGI:107286	Man2b1	mannosidase 2, alpha B1	protein coding gene	ENSMUSG00000005142	17159	O09159	Necessary for the catabolism of N-linked carbohydrates released during glycoprotein turnover.	0	cellular protein modification process [GO:0006464]; learning or memory [GO:0007611]; mannose metabolic process [GO:0006013]	alpha-mannosidase activity [GO:0004559]; mannose binding [GO:0005537]; metal ion binding [GO:0046872]	Glycosyl hydrolase 38 family												0.00139136	0.00258857	Krabbe disease	SMPDB	SMP00526	GAL3ST1; ARSA	9514; 410	22	22
St6galnac1	current symbol	MGI:1341826	St6galnac1	ST6 (alpha-N-acetyl-neuraminyl-2,3-beta-galactosyl-1,3)-N-acetylgalactosaminide alpha-2,6-sialyltransferase 1	protein coding gene	ENSMUSG00000009588	20445	Q9QZ39	Transfers CMP-NeuAc with an alpha-2,6-linkage to the GalNAc residues of GalNAc-O-Ser/Thr, Gal-beta-1,3-GalNAc-O-Ser/Thr and NeuAc-alpha-2,3-Gal-beta-1,3-GalNAc-O-Ser/Thr are substrates. Higher activity towards GalNAc-O-Ser/Thr. {ECO:0000269|PubMed:10788794}.	Protein modification; protein glycosylation.	ganglioside biosynthetic process [GO:0001574]; oligosaccharide biosynthetic process [GO:0009312]; protein glycosylation [GO:0006486]	alpha-N-acetylgalactosaminide alpha-2,6-sialyltransferase activity [GO:0001665]	Glycosyltransferase 29 family												0.00152146	0.00276628	Mannose type O-glycan biosynthesis - Homo sapiens (human)	KEGG	path:hsa00515	B3GAT2; B3GALNT2	148789; 135152	23	23
St6galnac2	current symbol	MGI:107553	St6galnac2	ST6 (alpha-N-acetyl-neuraminyl-2,3-beta-galactosyl-1,3)-N-acetylgalactosaminide alpha-2,6-sialyltransferase 2	protein coding gene	ENSMUSG00000057286	20446	P70277	Catalyzes the transfer of N-acetylneuraminyl groups onto glycan chains in glycoproteins. {ECO:0000269|PubMed:8662927}.	Protein modification; protein glycosylation. {ECO:0000269|PubMed:8662927}.	protein glycosylation [GO:0006486]; protein O-linked glycosylation [GO:0006493]; protein sialylation [GO:1990743]	alpha-N-acetylgalactosaminide alpha-2,6-sialyltransferase activity [GO:0001665]	Glycosyltransferase 29 family												0.00165714	0.00294603	Calnexin/calreticulin cycle	Reactome	R-HSA-901042	CALR; EDEM2	811; 55741	24	24
St6galnac6	current symbol	MGI:1355316	St6galnac6	ST6 (alpha-N-acetyl-neuraminyl-2,3-beta-galactosyl-1,3)-N-acetylgalactosaminide alpha-2,6-sialyltransferase 6	protein coding gene	ENSMUSG00000026811	50935	Q9JM95	Transfers the sialyl group (N-acetyl-alpha-neuraminyl or NeuAc) from CMP-NeuAc onto glycolipids, forming an alpha-2,6-linkage. Produces branched type disialyl structures by transfer of a sialyl group onto the GalNAc or GlcNAc residue inside backbone core chains having a terminal sialic acid with an alpha-2,3-linkage on Gal. ST6GalNAcVI prefers glycolipids to glycoproteins, predominantly catalyzin…	0	cell-cell recognition [GO:0009988]; ganglioside biosynthetic process [GO:0001574]; glycoprotein metabolic process [GO:0009100]; glycosphingolipid metabolic process [GO:0006687]; glycosylceramide metabolic process [GO:0006677]; oligosaccharide biosynthetic process [GO:0009312]; oligosaccharide metabolic process [GO:0009311]; protein glycosylation [GO:0006486]	alpha-N-acetylgalactosaminide alpha-2,6-sialyltransferase activity [GO:0001665]; sialyltransferase activity [GO:0008373]	Glycosyltransferase 29 family												0.00194517	0.00338291	Glucuronidation	Wikipathways	WP698	UGDH; HK1	7358; 3098	26	26
St6galnac5	current symbol	MGI:1349471	St6galnac5	ST6 (alpha-N-acetyl-neuraminyl-2,3-beta-galactosyl-1,3)-N-acetylgalactosaminide alpha-2,6-sialyltransferase 5	protein coding gene	ENSMUSG00000039037	26938	Q9QYJ1	Predominantly catalyzes the biosynthesis of ganglioside GD1alpha from GM1b in the brain, by transferring the sialyl group (N-acetyl-alpha-neuraminyl or NeuAc) from CMP-NeuAc to the GalNAc residue on the NeuAc-alpha-2,3-Gal-beta-1,3-GalNAc sequence of GM1b (PubMed:10601645, PubMed:10521438). GD1alpha is a critical molecule in the communication and interaction between neuronal cells and their suppo…	Glycolipid biosynthesis. {ECO:0000305|PubMed:10521438, ECO:0000305|PubMed:10601645}.	ganglioside biosynthetic process [GO:0001574]; glycosphingolipid biosynthetic process [GO:0006688]; oligosaccharide biosynthetic process [GO:0009312]; oligosaccharide metabolic process [GO:0009311]; protein glycosylation [GO:0006486]	alpha-N-acetylgalactosaminide alpha-2,6-sialyltransferase activity [GO:0001665]; sialyltransferase activity [GO:0008373]	Glycosyltransferase 29 family												0.00241845	0.00411651	mucin core 1 and core 2 <i>O</i>-glycosylation	HumanCyc	PWY-7433	GALNT6; GALNT13	114805; 11226	29	29
Naglu	current symbol	MGI:1351641	Naglu	alpha-N-acetylglucosaminidase (Sanfilippo disease IIIB)	protein coding gene	ENSMUSG00000001751	27419	O54752	0	0	cerebellar Purkinje cell layer development [GO:0021680]; inner ear receptor cell development [GO:0060119]; locomotor rhythm [GO:0045475]; lysosome organization [GO:0007040]; metabolic process [GO:0008152]; middle ear morphogenesis [GO:0042474]; retinal rod cell development [GO:0046548]	alpha-N-acetylglucosaminidase activity [GO:0004561]	0												0.0025871	0.00431183	Ascorbate and aldarate metabolism - Homo sapiens (human)	KEGG	path:hsa00053	UGDH; KL	9365; 7358	30	30
St8sia4	current symbol	MGI:106018	St8sia4	ST8 alpha-N-acetyl-neuraminide alpha-2,8-sialyltransferase 4	protein coding gene	ENSMUSG00000040710	20452	Q64692	Catalyzes the polycondensation of alpha-2,8-linked sialic acid required for the synthesis of polysialic acid (PSA), which is present on the embryonic neural cell adhesion molecule (N-CAM), necessary for plasticity of neural cells.	Protein modification; protein glycosylation.	ganglioside biosynthetic process [GO:0001574]; N-glycan processing [GO:0006491]; oligosaccharide metabolic process [GO:0009311]; protein glycosylation [GO:0006486]	alpha-N-acetylneuraminate alpha-2,8-sialyltransferase activity [GO:0003828]	Glycosyltransferase 29 family												0.00294056	0.00480091	Mucin type O-glycan biosynthesis - Homo sapiens (human)	KEGG	path:hsa00512	GALNT6; GALNT13	114805; 11226	32	32
St8sia3	current symbol	MGI:106019	St8sia3	ST8 alpha-N-acetyl-neuraminide alpha-2,8-sialyltransferase 3	protein coding gene	ENSMUSG00000056812	20451	Q64689	Catalyzes the transfer of sialic acid from a CMP-linked sialic acid donor onto the terminal sialic acid of an acceptor through alpha-2,8-linkages. Is active with alpha-2,3-linked, alpha-2,6-linked and alpha-2,8-linked sialic acid of N-linked oligosaccharides of glycoproteins and glycolipids. Displays preference for substrates with alpha-2,3-linked terminal sialic acid. It can form polysialic acid…	Protein modification; protein glycosylation. {ECO:0000269|PubMed:7782326}.	ganglioside biosynthetic process [GO:0001574]; glycoprotein metabolic process [GO:0009100]; N-glycan processing [GO:0006491]; oligosaccharide metabolic process [GO:0009311]; protein glycosylation [GO:0006486]; protein sialylation [GO:1990743]	alpha-N-acetylneuraminate alpha-2,8-sialyltransferase activity [GO:0003828]; identical protein binding [GO:0042802]; sialyltransferase activity [GO:0008373]	Glycosyltransferase 29 family												0.00312532	0.00490247	N-glycan trimming in the ER and Calnexin/Calreticulin cycle	Reactome	R-HSA-532668	CALR; EDEM2	811; 55741	33	33
St8sia6	current symbol	MGI:2386797	St8sia6	ST8 alpha-N-acetyl-neuraminide alpha-2,8-sialyltransferase 6	protein coding gene	ENSMUSG00000003418	241230	Q8K4T1	Alpha-2,8-sialyltransferase that prefers O-glycans to N-glycans or glycolipids as acceptor substrates. The minimal acceptor substrate is the NeuAc-alpha-2,3(6)-Gal sequence at the non-reducing end of their carbohydrate groups. {ECO:0000269|PubMed:11980897}.	Protein modification; protein glycosylation.	blastocyst hatching [GO:0001835]; carbohydrate biosynthetic process [GO:0016051]; ganglioside biosynthetic process [GO:0001574]; glycolipid biosynthetic process [GO:0009247]; glycoprotein metabolic process [GO:0009100]; N-glycan processing [GO:0006491]; oligosaccharide metabolic process [GO:0009311]; protein glycosylation [GO:0006486]; protein O-linked glycosylation [GO:0006493]	alpha-N-acetylneuraminate alpha-2,8-sialyltransferase activity [GO:0003828]; sialyltransferase activity [GO:0008373]	Glycosyltransferase 29 family												0.00312532	0.00490247	Fructose and mannose metabolism - Homo sapiens (human)	KEGG	path:hsa00051	HK1; MPI	3098; 4351	33	33
St8sia1	current symbol	MGI:106011	St8sia1	ST8 alpha-N-acetyl-neuraminide alpha-2,8-sialyltransferase 1	protein coding gene	ENSMUSG00000030283	20449	Q64687	Catalyzes the addition of sialic acid in alpha 2,8-linkage to the sialic acid moiety of the ganglioside GM3 to form ganglioside GD3; gangliosides are a subfamily of complex glycosphinglolipds that contain one or more residues of sialic acid (PubMed:8910600). Can catalyze the addition of a second alpha-2,8- sialic acid to GD3 to form GT3 (PubMed:8910600). Can use GM1b, GD1a and GT1b as acceptor su…	Protein modification; protein glycosylation.; Lipid metabolism; sphingolipid metabolism.	cellular response to heat [GO:0034605]; N-glycan processing [GO:0006491]; oligosaccharide metabolic process [GO:0009311]; positive regulation of cell population proliferation [GO:0008284]; protein glycosylation [GO:0006486]; sphingolipid metabolic process [GO:0006665]	alpha-N-acetylneuraminate alpha-2,8-sialyltransferase activity [GO:0003828]; sialyltransferase activity [GO:0008373]	Glycosyltransferase 29 family												0.00331541	0.00510062	Pentose and glucuronate interconversions - Homo sapiens (human)	KEGG	path:hsa00040	UGDH; KL	9365; 7358	34	34
St8sia2	current symbol	MGI:106020	St8sia2	ST8 alpha-N-acetyl-neuraminide alpha-2,8-sialyltransferase 2	protein coding gene	ENSMUSG00000025789	20450	O35696	May transfer sialic acid through alpha-2,8-linkages to the alpha-2,3-linked and alpha-2,6-linked sialic acid of N-linked oligosaccharides of glycoproteins and may be involved in PSA (polysialic acid) expression. {ECO:0000250}.	Protein modification; protein glycosylation.	ganglioside biosynthetic process [GO:0001574]; neuron projection extension [GO:1990138]; N-glycan processing [GO:0006491]; oligosaccharide metabolic process [GO:0009311]; positive regulation of neuron death [GO:1901216]; positive regulation of synapse assembly [GO:0051965]; protein glycosylation [GO:0006486]	alpha-N-acetylneuraminate alpha-2,8-sialyltransferase activity [GO:0003828]; sialyltransferase activity [GO:0008373]	Glycosyltransferase 29 family												0.00371142	0.00552245	O-Glycan biosynthesis	EHMN	O-Glycan biosynthesis	GALNT6; GALNT13	114805; 11226	36	36
St8sia5	current symbol	MGI:109243	St8sia5	ST8 alpha-N-acetyl-neuraminide alpha-2,8-sialyltransferase 5	protein coding gene	ENSMUSG00000025425	225742	P70126	Involved in the synthesis of gangliosides GD1c, GT1a, GQ1b, GP1c and GT3 from GD1a, GT1b, GM1b and GD3 respectively. {ECO:0000269|PubMed:8910600}.	Protein modification; protein glycosylation. {ECO:0000269|PubMed:8910600}.	glycosphingolipid biosynthetic process [GO:0006688]; N-glycan processing [GO:0006491]; oligosaccharide metabolic process [GO:0009311]; protein glycosylation [GO:0006486]	alpha-N-acetylneuraminate alpha-2,8-sialyltransferase activity [GO:0003828]; sialyltransferase activity [GO:0008373]	Glycosyltransferase 29 family												0.00372765	0.00552245	Integrin	INOH	None	SDC1; COL9A2; KERA	6382; 11081; 1298	124	124
Neu3	current symbol	MGI:1355305	Neu3	neuraminidase 3	protein coding gene	ENSMUSG00000035239	50877	Q9JMH7	Exo-alpha-sialidase that catalyzes the hydrolytic cleavage of the terminal sialic acid (N-acetylneuraminic acid, Neu5Ac) of a glycan moiety in the catabolism of glycolipids, glycoproteins and oligosacharides. Displays high catalytic efficiency for gangliosides including alpha-(2->3)-sialylated GD1a and GM3 and alpha-(2->8)-sialylated GD3 (PubMed:17708748, PubMed:10713120, PubMed:11696012, PubMed:…	0	carbohydrate metabolic process [GO:0005975]; ganglioside catabolic process [GO:0006689]; negative regulation of clathrin-dependent endocytosis [GO:1900186]; oligosaccharide catabolic process [GO:0009313]; positive regulation of epidermal growth factor receptor signaling pathway [GO:0045742]	alpha-sialidase activity [GO:0016997]; exo-alpha-(2->3)-sialidase activity [GO:0052794]; exo-alpha-(2->6)-sialidase activity [GO:0052795]; exo-alpha-(2->8)-sialidase activity [GO:0052796]; exo-alpha-sialidase activity [GO:0004308]	Glycosyl hydrolase 33 family												0.00502438	0.0073082	N-Glycan biosynthesis	EHMN	N-Glycan biosynthesis	ALG3; MAN1A2	10195; 10905	42	42
Neu1	current symbol	MGI:97305	Neu1	neuraminidase 1	protein coding gene	ENSMUSG00000007038	18010	O35657	Catalyzes the removal of sialic acid (N-acetylneuraminic acid) moieties from glycoproteins and glycolipids. To be active, it is strictly dependent on its presence in the multienzyme complex. Appears to have a preference for alpha 2-3 and alpha 2-6 sialyl linkage. {ECO:0000269|PubMed:9363440, ECO:0000269|PubMed:9384611}.	0	ganglioside catabolic process [GO:0006689]; oligosaccharide catabolic process [GO:0009313]; positive regulation of neuron projection development [GO:0010976]; regulation of myoblast proliferation [GO:2000291]	alpha-sialidase activity [GO:0016997]; exo-alpha-(2->3)-sialidase activity [GO:0052794]; exo-alpha-(2->6)-sialidase activity [GO:0052795]; exo-alpha-(2->8)-sialidase activity [GO:0052796]; exo-alpha-sialidase activity [GO:0004308]	Glycosyl hydrolase 33 family												0.00600172	0.00857388	Glycosphingolipid metabolism	Reactome	R-HSA-1660662	HEXB; ARSA	410; 3074	46	46
B4galt1	current symbol	MGI:95705	B4galt1	UDP-Gal:betaGlcNAc beta 1,4- galactosyltransferase, polypeptide 1	protein coding gene	ENSMUSG00000028413	14595	P15535	[Beta-1,4-galactosyltransferase 1]: The Golgi complex form catalyzes the production of lactose in the lactating mammary gland and could also be responsible for the synthesis of complex-type N-linked oligosaccharides in many glycoproteins as well as the carbohydrate moieties of glycolipids. {ECO:0000250|UniProtKB:P08037}.; [Processed beta-1,4-galactosyltransferase 1]: The cell surface form functio…	Protein modification; protein glycosylation.	acute inflammatory response [GO:0002526]; angiogenesis involved in wound healing [GO:0060055]; binding of sperm to zona pellucida [GO:0007339]; cell adhesion [GO:0007155]; development of secondary sexual characteristics [GO:0045136]; epithelial cell development [GO:0002064]; extracellular matrix organization [GO:0030198]; galactose metabolic process [GO:0006012]; glycoprotein biosynthetic process…	alpha-tubulin binding [GO:0043014]; beta-N-acetylglucosaminylglycopeptide beta-1,4-galactosyltransferase activity [GO:0003831]; beta-tubulin binding [GO:0048487]; cytoskeletal protein binding [GO:0008092]; galactosyltransferase activity [GO:0008378]; identical protein binding [GO:0042802]; lactose synthase activity [GO:0004461]; manganese ion binding [GO:0030145]; N-acetyllactosamine synthase act…	Glycosyltransferase 7 family												0.00678711	0.00952577	Sphingolipid metabolism - Homo sapiens (human)	KEGG	path:hsa00600	GAL3ST1; ARSA	410; 9514	49	49
Gfpt1	current symbol	MGI:95698	Gfpt1	glutamine fructose-6-phosphate transaminase 1	protein coding gene	ENSMUSG00000029992	14583	P47856	Controls the flux of glucose into the hexosamine pathway. Most likely involved in regulating the availability of precursors for N- and O-linked glycosylation of proteins. Regulates the circadian expression of clock genes ARNTL/BMAL1 and CRY1. {ECO:0000269|PubMed:23395176}.	Nucleotide-sugar biosynthesis; UDP-N-acetyl-alpha-D-glucosamine biosynthesis; alpha-D-glucosamine 6-phosphate from D-fructose 6-phosphate: step 1/1. {ECO:0000250|UniProtKB:P82808}.	circadian regulation of gene expression [GO:0032922]; fructose 6-phosphate metabolic process [GO:0006002]; glucosamine biosynthetic process [GO:0006042]; glutamine metabolic process [GO:0006541]; negative regulation of glycogen biosynthetic process [GO:0045719]; protein N-linked glycosylation [GO:0006487]; UDP-N-acetylglucosamine biosynthetic process [GO:0006048]; UDP-N-acetylglucosamine metaboli…	amino acid binding [GO:0016597]; carbohydrate binding [GO:0030246]; carbohydrate derivative binding [GO:0097367]; glutamine-fructose-6-phosphate transaminase (isomerizing) activity [GO:0004360]; identical protein binding [GO:0042802]	0												0.0079879	0.0110178	Class I MHC mediated antigen processing & presentation	Reactome	R-HSA-983169	FBXO44; FBXO2; CALR; FBXO6	93611; 26232; 26270; 811	316	316
Fbxo2	current symbol	MGI:2446216	Fbxo2	F-box protein 2	protein coding gene	ENSMUSG00000041556	230904	Q80UW2	Substrate recognition component of a SCF (SKP1-CUL1-F-box protein) E3 ubiquitin-protein ligase complex that mediates the ubiquitination and subsequent proteasomal degradation of target proteins. Involved in the endoplasmic reticulum-associated degradation pathway (ERAD) for misfolded lumenal proteins by recognizing and binding sugar chains on unfolded glycoproteins that are retrotranslocated into…	Protein modification; protein ubiquitination.	glycoprotein catabolic process [GO:0006516]; negative regulation of cell population proliferation [GO:0008285]; protein ubiquitination [GO:0016567]; regulation of protein ubiquitination [GO:0031396]; SCF-dependent proteasomal ubiquitin-dependent protein catabolic process [GO:0031146]; ubiquitin-dependent ERAD pathway [GO:0030433]; ubiquitin-dependent protein catabolic process [GO:0006511]	amyloid-beta binding [GO:0001540]; carbohydrate binding [GO:0030246]	0
Calr	current symbol	MGI:88252	Calr	calreticulin	protein coding gene	ENSMUSG00000003814	12317	P14211	Calcium-binding chaperone that promotes folding, oligomeric assembly and quality control in the endoplasmic reticulum (ER) via the calreticulin/calnexin cycle. This lectin interacts transiently with almost all of the monoglucosylated glycoproteins that are synthesized in the ER (PubMed:20880849, PubMed:21652723). Interacts with the DNA-binding domain of NR3C1 and mediates its nuclear export (By s…	0	cardiac muscle cell differentiation [GO:0055007]; cellular response to lithium ion [GO:0071285]; cellular senescence [GO:0090398]; cortical actin cytoskeleton organization [GO:0030866]; endoplasmic reticulum unfolded protein response [GO:0030968]; negative regulation of intracellular steroid hormone receptor signaling pathway [GO:0033144]; negative regulation of neuron differentiation [GO:0045665…	androgen receptor binding [GO:0050681]; calcium ion binding [GO:0005509]; carbohydrate binding [GO:0030246]; hormone binding [GO:0042562]; integrin binding [GO:0005178]; iron ion binding [GO:0005506]; mRNA binding [GO:0003729]; peptide binding [GO:0042277]; ubiquitin protein ligase binding [GO:0031625]; unfolded protein binding [GO:0051082]	Calreticulin family												Phencyclidine Treatment - Striatal Tissue-2hr
Fcnb	current symbol	MGI:1341158	Fcnb	ficolin B	protein coding gene	ENSMUSG00000026835	14134	O70497	May function in innate immunity through activation of the lectin complement pathway. Calcium-dependent and GlcNAc-binding lectin (By similarity). {ECO:0000250|UniProtKB:Q15485}.	0	cell surface pattern recognition receptor signaling pathway [GO:0002752]; complement activation, lectin pathway [GO:0001867]; G protein-coupled receptor signaling pathway [GO:0007186]; negative regulation of viral entry into host cell [GO:0046597]; positive regulation of interleukin-8 production [GO:0032757]; protein localization to cell surface [GO:0034394]; recognition of apoptotic cell [GO:004…	antigen binding [GO:0003823]; carbohydrate binding [GO:0030246]; carbohydrate derivative binding [GO:0097367]; G protein-coupled receptor binding [GO:0001664]; metal ion binding [GO:0046872]; pattern recognition receptor activity [GO:0038187]; sialic acid binding [GO:0033691]; signaling receptor binding [GO:0005102]	Ficolin lectin family												p-value	q-value	pathway	source	external_id	members_input_overlap	members_input_overlap_geneids	size	effective_size
Slc35c2	current symbol	MGI:2385166	Slc35c2	solute carrier family 35, member C2	protein coding gene	ENSMUSG00000017664	228875	Q8VCX2	May play an important role in the cellular response to tissue hypoxia. May be either a GDP-fucose transporter that competes with SLC35C1 for GDP-fucose, or a factor that otherwise enhances the fucosylation of Notch and is required for optimal Notch signaling in mammalian cells (By similarity). {ECO:0000250}.	0	fucosylation [GO:0036065]; negative regulation of gene expression [GO:0010629]; positive regulation of Notch signaling pathway [GO:0045747]; protein O-linked fucosylation [GO:0036066]; UDP-glucose transmembrane transport [GO:0015786]	antiporter activity [GO:0015297]	TPT transporter family, SLC35C subfamily												8.3235e-05	0.00083235	Glycosphingolipid biosynthesis - ganglioseries	EHMN	Glycosphingolipid biosynthesis - ganglioseries	GAL3ST1; HEXB	9514; 3074	21	21
Slc35a1	current symbol	MGI:1345622	Slc35a1	solute carrier family 35 (CMP-sialic acid transporter), member 1	protein coding gene	ENSMUSG00000028293	24060	Q61420	Transports CMP-sialic acid from the cytosol into Golgi vesicles where glycosyltransferases function (PubMed:8755516, PubMed:10085119, PubMed:30985278). Efficient CMP-sialic acid uptake depends on the presence of free CMP inside the vesicles, suggesting the proteins functions as an antiporter (PubMed:30985278). Binds both CMP-sialic acid and free CMP, but has higher affinity for free CMP (PubMed:3…	0	carbohydrate transport [GO:0008643]; CMP-N-acetylneuraminate transmembrane transport [GO:0015782]	antiporter activity [GO:0015297]; CMP-N-acetylneuraminate transmembrane transporter activity [GO:0005456]; UDP-galactose transmembrane transporter activity [GO:0005459]	Nucleotide-sugar transporter family, SLC35A subfamily												0.000208405	0.00104203	Keratan sulfate/keratin metabolism	Reactome	R-HSA-1638074	HEXB; KERA	3074; 11081	33	33
Slc35c1	current symbol	MGI:2443301	Slc35c1	solute carrier family 35, member C1	protein coding gene	ENSMUSG00000049922	228368	Q8BLX4	Involved in GDP-fucose import from the cytoplasm into the Golgi lumen. {ECO:0000250}.	0	carbohydrate transport [GO:0008643]; GDP-fucose import into Golgi lumen [GO:0036085]; lipid glycosylation [GO:0030259]; negative regulation of Notch signaling pathway [GO:0045746]; protein O-linked fucosylation [GO:0036066]	antiporter activity [GO:0015297]; GDP-fucose transmembrane transporter activity [GO:0005457]	TPT transporter family, SLC35C subfamily												0.00268958	0.00896526	Glycosaminoglycan metabolism	Reactome	R-HSA-1630316	HEXB; KERA	11081; 3074	119	119
Slc35d1	current symbol	MGI:2140361	Slc35d1	solute carrier family 35 (UDP-glucuronic acid/UDP-N-acetylgalactosamine dual transporter), member D1	protein coding gene	ENSMUSG00000028521	242585	A2AKQ0	Transports both UDP-glucuronic acid (UDP-GlcA) and UDP-N-acetylgalactosamine (UDP-GalNAc) from the cytoplasm into the endoplasmic reticulum lumen. Plays a role in chondroitin sulfate biosynthesis, which is important for formation of cartilage extracellular matrix and normal skeletal development. {ECO:0000269|PubMed:17952091}.	0	carbohydrate transport [GO:0008643]; chondroitin sulfate biosynthetic process [GO:0030206]; embryonic skeletal system development [GO:0048706]; pyrimidine nucleotide-sugar transmembrane transport [GO:0090481]	antiporter activity [GO:0015297]; pyrimidine nucleotide-sugar transmembrane transporter activity [GO:0015165]; UDP-glucuronic acid transmembrane transporter activity [GO:0005461]; UDP-N-acetylgalactosamine transmembrane transporter activity [GO:0005463]; UDP-N-acetylglucosamine transmembrane transporter activity [GO:0005462]	TPT transporter family, SLC35D subfamily												0.00643888	0.0160972	Metapathway biotransformation Phase I and II	Wikipathways	WP702	GAL3ST1; GAL3ST3	9514; 89792	186	186
Slc35d2	current symbol	MGI:1917734	Slc35d2	solute carrier family 35, member D2	protein coding gene	ENSMUSG00000033114	70484	Q762D5	Antiporter transporting nucleotide sugars such as UDP-N-acetylglucosamine (UDP-GlcNAc), UDP-glucose (UDP-Glc) and GDP-mannose (GDP-Man) pooled in the cytosol into the lumen of the Golgi in exchange for the corresponding nucleosides monophosphates (UMP for UDP-sugars and GMP for GDP-sugars). May take part in heparan sulfate synthesis by supplying UDP-Glc-NAc, the donor substrate, and thus be invol…	0	carbohydrate transport [GO:0008643]	antiporter activity [GO:0015297]; UDP-glucuronic acid transmembrane transporter activity [GO:0005461]; UDP-N-acetylgalactosamine transmembrane transporter activity [GO:0005463]; UDP-N-acetylglucosamine transmembrane transporter activity [GO:0005462]	TPT transporter family, SLC35D subfamily
Canx	current symbol	MGI:88261	Canx	calnexin	protein coding gene	ENSMUSG00000020368	12330	P35564	Calcium-binding protein that interacts with newly synthesized glycoproteins in the endoplasmic reticulum. It may act in assisting protein assembly and/or in the retention within the ER of unassembled protein subunits. It seems to play a major role in the quality control apparatus of the ER by the retention of incorrectly folded proteins. Associated with partial T-cell antigen receptor complexes t…	0	aging [GO:0007568]; clathrin-dependent endocytosis [GO:0072583]; endoplasmic reticulum unfolded protein response [GO:0030968]; protein folding [GO:0006457]; synaptic vesicle endocytosis [GO:0048488]	apolipoprotein binding [GO:0034185]; calcium ion binding [GO:0005509]; carbohydrate binding [GO:0030246]; ionotropic glutamate receptor binding [GO:0035255]; unfolded protein binding [GO:0051082]	Calreticulin family												Phencyclidine Treatment - Striatal Tissue-1hr
Arsa	current symbol	MGI:88077	Arsa	arylsulfatase A	protein coding gene	ENSMUSG00000022620	11883	P50428	Hydrolyzes cerebroside sulfate. {ECO:0000269|PubMed:24294900}.	0	autophagy [GO:0006914]; binding of sperm to zona pellucida [GO:0007339]; central nervous system development [GO:0007417]; response to estrogen [GO:0043627]; response to ethanol [GO:0045471]; response to methylmercury [GO:0051597]; response to nutrient [GO:0007584]; response to pH [GO:0009268]	arylsulfatase activity [GO:0004065]; calcium ion binding [GO:0005509]; cerebroside-sulfatase activity [GO:0004098]; sulfuric ester hydrolase activity [GO:0008484]	Sulfatase family												No enrichment Results obtained !!!
Arsb	current symbol	MGI:88075	Arsb	arylsulfatase B	protein coding gene	ENSMUSG00000042082	11881	P50429	Removes sulfate groups from chondroitin-4-sulfate (C4S) and regulates its degradation (By similarity). Involved in the regulation of cell adhesion, cell migration and invasion in colonic epithelium (By similarity). In the central nervous system, is a regulator of neurite outgrowth and neuronal plasticity, acting through the control of sulfate glycosaminoglycans and neurocan levels (By similarity)…	0	anterior head development [GO:0097065]; autophagy [GO:0006914]; central nervous system development [GO:0007417]; colon epithelial cell migration [GO:0061580]; positive regulation of neuron projection development [GO:0010976]; regulation of epithelial cell migration [GO:0010632]; response to estrogen [GO:0043627]; response to methylmercury [GO:0051597]; response to nutrient [GO:0007584]; response …	arylsulfatase activity [GO:0004065]; metal ion binding [GO:0046872]; N-acetylgalactosamine-4-sulfatase activity [GO:0003943]; sulfuric ester hydrolase activity [GO:0008484]	Sulfatase family
Galns	current symbol	MGI:1355303	Galns	galactosamine (N-acetyl)-6-sulfate sulfatase	protein coding gene	ENSMUSG00000015027	50917	Q571E4	0	0	0	arylsulfatase activity [GO:0004065]; metal ion binding [GO:0046872]; N-acetylgalactosamine-6-sulfatase activity [GO:0043890]; sulfuric ester hydrolase activity [GO:0008484]	Sulfatase family
Asgr1	current symbol	MGI:88081	Asgr1	asialoglycoprotein receptor 1	protein coding gene	ENSMUSG00000020884	11889	P34927	Mediates the endocytosis of plasma glycoproteins to which the terminal sialic acid residue on their complex carbohydrate moieties has been removed. The receptor recognizes terminal galactose and N-acetylgalactosamine units. After ligand binding to the receptor, the resulting complex is internalized and transported to a sorting organelle, where receptor and ligand are disassociated. The receptor t…	0	cellular response to extracellular stimulus [GO:0031668]	asialoglycoprotein receptor activity [GO:0004873]; carbohydrate binding [GO:0030246]; identical protein binding [GO:0042802]; metal ion binding [GO:0046872]	0
Smc3	current symbol	MGI:1339795	Smc3	structural maintenance of chromosomes 3	protein coding gene	ENSMUSG00000024974	13006	Q9CW03	Central component of cohesin, a complex required for chromosome cohesion during the cell cycle. The cohesin complex may form a large proteinaceous ring within which sister chromatids can be trapped. At anaphase, the complex is cleaved and dissociates from chromatin, allowing sister chromatids to segregate. Cohesion is coupled to DNA replication and is involved in DNA repair. The cohesin complex p…	0	cell division [GO:0051301]; DNA repair [GO:0006281]; meiotic cell cycle [GO:0051321]; mitotic spindle assembly [GO:0090307]; regulation of DNA replication [GO:0006275]; sister chromatid cohesion [GO:0007062]; stem cell population maintenance [GO:0019827]	ATP binding [GO:0005524]; beta-tubulin binding [GO:0048487]; chromatin binding [GO:0003682]; dynein complex binding [GO:0070840]; mediator complex binding [GO:0036033]; protein heterodimerization activity [GO:0046982]	SMC family, SMC3 subfamily
Gne	current symbol	MGI:1354951	Gne	glucosamine (UDP-N-acetyl)-2-epimerase/N-acetylmannosamine kinase	protein coding gene	ENSMUSG00000028479	50798	Q91WG8	Regulates and initiates biosynthesis of N-acetylneuraminic acid (NeuAc), a precursor of sialic acids. Required for normal sialylation in hematopoietic cells (By similarity). Sialylation is implicated in cell adhesion, signal transduction, tumorigenicity and metastatic behavior of malignant cells. Plays an essential role in early development. {ECO:0000250, ECO:0000269|PubMed:11929971}.	Amino-sugar metabolism; N-acetylneuraminate biosynthesis.	N-acetylglucosamine biosynthetic process [GO:0006045]; N-acetylneuraminate metabolic process [GO:0006054]; UDP-N-acetylglucosamine metabolic process [GO:0006047]	ATP binding [GO:0005524]; catalytic activity [GO:0003824]; hydrolase activity, hydrolyzing O-glycosyl compounds [GO:0004553]; metal ion binding [GO:0046872]; N-acylmannosamine kinase activity [GO:0009384]; UDP-N-acetylglucosamine 2-epimerase activity [GO:0008761]	UDP-N-acetylglucosamine 2-epimerase family; ROK (NagC/XylR) family
Hk3	current symbol	MGI:2670962	Hk3	hexokinase 3	protein coding gene	ENSMUSG00000025877	212032	Q3TRM8	Catalyzes the phosphorylation of hexose, such as D-glucose and D-fructose, to hexose 6-phosphate (D-glucose 6-phosphate and D-fructose 6-phosphate, respectively). Mediates the initial step of glycolysis by catalyzing phosphorylation of D-glucose to D-glucose 6-phosphate. {ECO:0000250|UniProtKB:P27926}.	Carbohydrate metabolism; hexose metabolism. {ECO:0000250|UniProtKB:P27926}.; Carbohydrate degradation; glycolysis; D-glyceraldehyde 3-phosphate and glycerone phosphate from D-glucose: step 1/4. {ECO:0000250|UniProtKB:P27926}.	cellular glucose homeostasis [GO:0001678]; fructose 6-phosphate metabolic process [GO:0006002]; glucose 6-phosphate metabolic process [GO:0051156]; glycolytic process [GO:0006096]; hexose metabolic process [GO:0019318]; negative regulation of hydrogen peroxide-mediated programmed cell death [GO:1901299]	ATP binding [GO:0005524]; enzyme binding [GO:0019899]; fructokinase activity [GO:0008865]; glucokinase activity [GO:0004340]; glucose binding [GO:0005536]; hexokinase activity [GO:0004396]; hormone binding [GO:0042562]; mannokinase activity [GO:0019158]	Hexokinase family
Hk1	current symbol	MGI:96103	Hk1	hexokinase 1	protein coding gene	ENSMUSG00000037012	15275	P17710	Catalyzes the phosphorylation of various hexoses, such as D-glucose, D-glucosamine, D-fructose, D-mannose and 2-deoxy-D-glucose, to hexose 6-phosphate (D-glucose 6-phosphate, D-glucosamine 6-phosphate, D-fructose 6-phosphate, D-mannose 6-phosphate and 2-deoxy-D-glucose 6-phosphate, respectively). Does not phosphorylate N-acetyl-D-glucosamine (By similarity). Mediates the initial step of glycolysi…	Carbohydrate metabolism; hexose metabolism. {ECO:0000250|UniProtKB:P19367}.; Carbohydrate degradation; glycolysis; D-glyceraldehyde 3-phosphate and glycerone phosphate from D-glucose: step 1/4. {ECO:0000250|UniProtKB:P05708}.	carbohydrate phosphorylation [GO:0046835]; cellular glucose homeostasis [GO:0001678]; establishment of protein localization to mitochondrion [GO:0072655]; fructose 6-phosphate metabolic process [GO:0006002]; glucose 6-phosphate metabolic process [GO:0051156]; glycolytic process [GO:0006096]; inflammatory response [GO:0006954]; innate immune response [GO:0045087]; maintenance of protein location i…	ATP binding [GO:0005524]; fructokinase activity [GO:0008865]; glucokinase activity [GO:0004340]; glucosamine kinase activity [GO:0047931]; glucose binding [GO:0005536]; hexokinase activity [GO:0004396]; identical protein binding [GO:0042802]; mannokinase activity [GO:0019158]; peptidoglycan binding [GO:0042834]; protein-containing complex binding [GO:0044877]; protein kinase activity [GO:0004672]	Hexokinase family
Hk2	current symbol	MGI:1315197	Hk2	hexokinase 2	protein coding gene	ENSMUSG00000000628	15277	O08528	Catalyzes the phosphorylation of hexose, such as D-glucose and D-fructose, to hexose 6-phosphate (D-glucose 6-phosphate and D-fructose 6-phosphate, respectively) (By similarity). Mediates the initial step of glycolysis by catalyzing phosphorylation of D-glucose to D-glucose 6-phosphate (By similarity). Plays a key role in maintaining the integrity of the outer mitochondrial membrane by preventing…	Carbohydrate metabolism; hexose metabolism. {ECO:0000250|UniProtKB:P52789}.; Carbohydrate degradation; glycolysis; D-glyceraldehyde 3-phosphate and glycerone phosphate from D-glucose: step 1/4. {ECO:0000250|UniProtKB:P52789}.	apoptotic mitochondrial changes [GO:0008637]; carbohydrate phosphorylation [GO:0046835]; cellular glucose homeostasis [GO:0001678]; cellular response to leukemia inhibitory factor [GO:1990830]; establishment of protein localization to mitochondrion [GO:0072655]; fructose 6-phosphate metabolic process [GO:0006002]; glucose 6-phosphate metabolic process [GO:0051156]; glucose metabolic process [GO:0…	ATP binding [GO:0005524]; fructokinase activity [GO:0008865]; glucokinase activity [GO:0004340]; glucose binding [GO:0005536]; hexokinase activity [GO:0004396]; mannokinase activity [GO:0019158]	Hexokinase family
Galk1	current symbol	MGI:95730	Galk1	galactokinase 1	protein coding gene	ENSMUSG00000020766	14635	Q9R0N0	Major enzyme for galactose metabolism.	Carbohydrate metabolism; galactose metabolism.	carbohydrate phosphorylation [GO:0046835]; galactitol metabolic process [GO:0019402]; galactose catabolic process via UDP-galactose [GO:0033499]; galactose metabolic process [GO:0006012]; glycolytic process from galactose [GO:0061623]	ATP binding [GO:0005524]; galactokinase activity [GO:0004335]; galactose binding [GO:0005534]	GHMP kinase family, GalK subfamily
Galk2	current symbol	MGI:1917226	Galk2	galactokinase 2	protein coding gene	ENSMUSG00000027207	69976	Q68FH4	Acts on GalNAc. Also acts as a galactokinase when galactose is present at high concentrations (By similarity). {ECO:0000250}.	0	galactose metabolic process [GO:0006012]	ATP binding [GO:0005524]; galactokinase activity [GO:0004335]; N-acetylgalactosamine kinase activity [GO:0033858]	GHMP kinase family, GalK subfamily
Fam20b	current symbol	MGI:2443990	Fam20b	FAM20B, glycosaminoglycan xylosylkinase	protein coding gene	ENSMUSG00000033557	215015	Q8VCS3	Responsible for the 2-O-phosphorylation of xylose in the glycosaminoglycan-protein linkage region of proteoglycans thereby regulating the amount of mature GAG chains. Sulfated glycosaminoglycans (GAGs), including heparan sulfate and chondroitin sulfate, are synthesized on the so-called common GAG-protein linkage region (GlcUAbeta1-3Galbeta1-3Galbeta1-4Xylbeta1-O-Ser) of core proteins, which is fo…	0	proteoglycan biosynthetic process [GO:0030166]	ATP binding [GO:0005524]; kinase activity [GO:0016301]; metal ion binding [GO:0046872]; phosphotransferase activity, alcohol group as acceptor [GO:0016773]	FAM20 family
Nagk	current symbol	MGI:1860418	Nagk	N-acetylglucosamine kinase	protein coding gene	ENSMUSG00000034744	56174	Q9QZ08	Converts endogenous N-acetylglucosamine (GlcNAc), a major component of complex carbohydrates, from lysosomal degradation or nutritional sources into GlcNAc 6-phosphate. Involved in the N-glycolylneuraminic acid (Neu5Gc) degradation pathway. Also has ManNAc kinase activity. {ECO:0000269|PubMed:10824116}.	Amino-sugar metabolism; N-acetylneuraminate degradation. {ECO:0000269|PubMed:22692205}.	N-acetylglucosamine metabolic process [GO:0006044]; N-acetylneuraminate catabolic process [GO:0019262]	ATP binding [GO:0005524]; N-acetylglucosamine kinase activity [GO:0045127]; N-acylmannosamine kinase activity [GO:0009384]	Eukaryotic-type N-acetylglucosamine kinase family
Xylb	current symbol	MGI:2142985	Xylb	xylulokinase homolog (H. influenzae)	protein coding gene	ENSMUSG00000035769	102448	Q3TNA1	Phosphorylates D-xylulose to produce D-xylulose 5-phosphate, a molecule that may play an important role in the regulation of glucose metabolism and lipogenesis. {ECO:0000250}.	0	D-xylose metabolic process [GO:0042732]; phosphorylation [GO:0016310]; xylulose metabolic process [GO:0005997]	ATP binding [GO:0005524]; phosphotransferase activity, alcohol group as acceptor [GO:0016773]; xylulokinase activity [GO:0004856]	FGGY kinase family
Tmtc4	current symbol	MGI:1921050	Tmtc4	transmembrane and tetratricopeptide repeat containing 4	protein coding gene	ENSMUSG00000041594	70551	Q8BG19	Transfers mannosyl residues to the hydroxyl group of serine or threonine residues. The 4 members of the TMTC family are O-mannosyl-transferases dedicated primarily to the cadherin superfamily, each member seems to have a distinct role in decorating the cadherin domains with O-linked mannose glycans at specific regions. Also acts as O-mannosyl-transferase on other proteins such as PDIA3. {ECO:0000…	Protein modification; protein glycosylation. {ECO:0000250|UniProtKB:Q5T4D3}.	endoplasmic reticulum unfolded protein response [GO:0030968]; outer hair cell apoptotic process [GO:1905584]; positive regulation of endoplasmic reticulum calcium ion concentration [GO:0032470]; protein O-linked mannosylation [GO:0035269]; sensory perception of sound [GO:0007605]	ATPase binding [GO:0051117]; dolichyl-phosphate-mannose-protein mannosyltransferase activity [GO:0004169]; mannosyltransferase activity [GO:0000030]	TMTC family
Mgat3	current symbol	MGI:104532	Mgat3	mannoside acetylglucosaminyltransferase 3	protein coding gene	ENSMUSG00000042428	17309	Q10470	It is involved in the regulation of the biosynthesis and biological function of glycoprotein oligosaccharides. Catalyzes the addition of N-acetylglucosamine in beta 1-4 linkage to the beta-linked mannose of the trimannosyl core of N-linked sugar chains, called bisecting N-acetylglucosamine (GlcNAc). It is one of the most important enzymes involved in the regulation of the biosynthesis of glycopro…	Protein modification; protein glycosylation. {ECO:0000305|PubMed:25592972}.	amyloid-beta metabolic process [GO:0050435]; canonical Wnt signaling pathway [GO:0060070]; cellular response to oxidative stress [GO:0034599]; cognition [GO:0050890]; N-acetylglucosamine metabolic process [GO:0006044]; negative regulation of lysosomal protein catabolic process [GO:1905166]; positive regulation of protein localization to early endosome [GO:1902966]; protein localization [GO:000810…	beta-1,4-mannosylglycoprotein 4-beta-N-acetylglucosaminyltransferase activity [GO:0003830]; glycosyltransferase activity [GO:0016757]	Glycosyltransferase 17 family
Glb1	current symbol	MGI:88151	Glb1	galactosidase, beta 1	protein coding gene	ENSMUSG00000045594	12091	P23780	Cleaves beta-linked terminal galactosyl residues from gangliosides, glycoproteins, and glycosaminoglycans. {ECO:0000250|UniProtKB:P16278}.	0	cellular carbohydrate metabolic process [GO:0044262]; galactose catabolic process [GO:0019388]; response to cortisone [GO:0051413]; response to Thyroglobulin triiodothyronine [GO:1904016]	beta-galactosidase activity [GO:0004565]; galactoside binding [GO:0016936]; hydrolase activity [GO:0016787]; protein homodimerization activity [GO:0042803]	Glycosyl hydrolase 35 family
St3gal1	current symbol	MGI:98304	St3gal1	ST3 beta-galactoside alpha-2,3-sialyltransferase 1	protein coding gene	ENSMUSG00000013846	20442	P54751	A beta-galactoside alpha2-3 sialyltransferase involved in terminal sialylation of glycoproteins and glycolipids (PubMed:8375377, PubMed:9184827). Catalyzes the transfer of sialic acid (N-acetyl-neuraminic acid; Neu5Ac) from the nucleotide sugar donor CMP-Neu5Ac onto acceptor Galbeta-(1->3)-GalNAc-terminated glycoconjugates through an alpha2-3 linkage (PubMed:8144500, PubMed:8375377, PubMed:918482…	Protein modification; protein glycosylation. {ECO:0000305|PubMed:10755614}.; Glycolipid biosynthesis. {ECO:0000305|PubMed:8375377}.	ganglioside biosynthetic process via lactosylceramide [GO:0010706]; memory B cell differentiation [GO:0002319]; N-acetylneuraminate metabolic process [GO:0006054]; negative regulation of activated CD8-positive, alpha-beta T cell apoptotic process [GO:1905403]; protein glycosylation [GO:0006486]; protein N-linked glycosylation [GO:0006487]; protein phosphorylation [GO:0006468]; protein sialylation…	beta-galactoside (CMP) alpha-2,3-sialyltransferase activity [GO:0003836]; monosialoganglioside sialyltransferase activity [GO:0047288]	Glycosyltransferase 29 family
St3gal4	current symbol	MGI:1316743	St3gal4	ST3 beta-galactoside alpha-2,3-sialyltransferase 4	protein coding gene	ENSMUSG00000032038	20443	Q91Y74	A beta-galactoside alpha2-3 sialyltransferase involved in terminal sialylation of glycoproteins and glycolipids (PubMed:12097641) (By similarity). Catalyzes the transfer of sialic acid (N-acetyl-neuraminic acid; Neu5Ac) from the nucleotide sugar donor CMP-Neu5Ac onto acceptor Galbeta-(1->3)-GalNAc- and Galbeta-(1->4)-GlcNAc-terminated glycoconjugates through an alpha2-3 linkage (PubMed:9184827) (…	Protein modification; protein glycosylation.	cognition [GO:0050890]; glycolipid biosynthetic process [GO:0009247]; glycoprotein biosynthetic process [GO:0009101]; lipid glycosylation [GO:0030259]; oligosaccharide biosynthetic process [GO:0009312]; positive regulation of blood coagulation [GO:0030194]; positive regulation of leukocyte tethering or rolling [GO:1903238]; protein glycosylation [GO:0006486]; protein sialylation [GO:1990743]; sia…	beta-galactoside (CMP) alpha-2,3-sialyltransferase activity [GO:0003836]; monosialoganglioside sialyltransferase activity [GO:0047288]; N-acetyllactosaminide alpha-2,3-sialyltransferase activity [GO:0008118]; neolactotetraosylceramide alpha-2,3-sialyltransferase activity [GO:0004513]; sialyltransferase activity [GO:0008373]	Glycosyltransferase 29 family
St3gal2	current symbol	MGI:99427	St3gal2	ST3 beta-galactoside alpha-2,3-sialyltransferase 2	protein coding gene	ENSMUSG00000031749	20444	Q11204	A beta-galactoside alpha2-3 sialyltransferase primarily involved in terminal sialylation of ganglio and globo series glycolipids (PubMed:8144500, PubMed:9184827). Catalyzes the transfer of sialic acid (N-acetyl-neuraminic acid; Neu5Ac) from the nucleotide sugar donor CMP-Neu5Ac onto acceptor Galbeta-(1->3)-GalNAc-terminated glycoconjugates through an alpha2-3 linkage. Sialylates GM1/GM1a, GA1/asi…	Protein modification; protein glycosylation. {ECO:0000305|PubMed:8144500}.; Glycolipid biosynthesis. {ECO:0000305|PubMed:22735313, ECO:0000305|PubMed:8144500}.	ganglioside biosynthetic process via lactosylceramide [GO:0010706]; globoside biosynthetic process via lactosylceramide [GO:0010707]; glycolipid biosynthetic process [GO:0009247]; glycoprotein biosynthetic process [GO:0009101]; lipid glycosylation [GO:0030259]; oligosaccharide biosynthetic process [GO:0009312]; protein glycosylation [GO:0006486]; protein sialylation [GO:1990743]; sialylation [GO:…	beta-galactoside (CMP) alpha-2,3-sialyltransferase activity [GO:0003836]; monosialoganglioside sialyltransferase activity [GO:0047288]; protein homodimerization activity [GO:0042803]; sialyltransferase activity [GO:0008373]	Glycosyltransferase 29 family
St3gal3	current symbol	MGI:1316659	St3gal3	ST3 beta-galactoside alpha-2,3-sialyltransferase 3	protein coding gene	ENSMUSG00000028538	20441	P97325	Catalyzes the formation of the NeuAc-alpha-2,3-Gal-beta-1,4-GlcNAc-, NeuAc-alpha-2,3-Gal-beta-1,3-GlcNAc- and NeuAc-alpha-2,3-Gal-beta-1,3-GalNAc- sequences found in terminal carbohydrate groups of glycoproteins and glycolipids. The highest activity is toward Gal-beta-1,3-GlcNAc and the lowest toward Gal-beta-1,3-GalNAc. {ECO:0000269|PubMed:9184827}.	Protein modification; protein glycosylation.	ganglioside biosynthetic process via lactosylceramide [GO:0010706]; protein glycosylation [GO:0006486]	beta-galactoside (CMP) alpha-2,3-sialyltransferase activity [GO:0003836]; N-acetyllactosaminide alpha-2,3-sialyltransferase activity [GO:0008118]; sialyltransferase activity [GO:0008373]	Glycosyltransferase 29 family
St3gal6	current symbol	MGI:1888707	St3gal6	ST3 beta-galactoside alpha-2,3-sialyltransferase 6	protein coding gene	ENSMUSG00000022747	54613	Q8VIB3	Involved in the synthesis of sialyl-paragloboside, a precursor of sialyl-Lewis X determinant. Has a alpha-2,3-sialyltransferase activity toward Gal-beta1,4-GlcNAc structure on glycoproteins and glycolipids. Has a restricted substrate specificity, it utilizes Gal-beta1,4-GlcNAc on glycoproteins, and neolactotetraosylceramide and neolactohexaosylceramide, but not lactotetraosylceramide, lactosylcer…	0	cellular protein modification process [GO:0006464]; cellular response to interleukin-6 [GO:0071354]; glycolipid metabolic process [GO:0006664]; oligosaccharide metabolic process [GO:0009311]; protein glycosylation [GO:0006486]	beta-galactoside alpha-2,3-sialyltransferase activity [GO:0052798]; sialyltransferase activity [GO:0008373]	Glycosyltransferase 29 family
St6gal1	current symbol	MGI:108470	St6gal1	beta galactoside alpha 2,6 sialyltransferase 1	protein coding gene	ENSMUSG00000022885	20440	Q64685	Transfers sialic acid from CMP-sialic acid to galactose-containing acceptor substrates. {ECO:0000269|PubMed:22039275}.	Protein modification; protein glycosylation. {ECO:0000269|PubMed:22039275}.	N-acetylneuraminate metabolic process [GO:0006054]; negative regulation of chemotaxis [GO:0050922]; negative regulation of macrophage apoptotic process [GO:2000110]; positive regulation of mononuclear cell proliferation [GO:0032946]; protein glycosylation [GO:0006486]; protein N-linked glycosylation via asparagine [GO:0018279]; protein sialylation [GO:1990743]; regulation of substrate adhesion-de…	beta-galactoside alpha-2,6-sialyltransferase activity [GO:0003835]; protein homodimerization activity [GO:0042803]; sialyltransferase activity [GO:0008373]	Glycosyltransferase 29 family
St6gal2	current symbol	MGI:2445190	St6gal2	beta galactoside alpha 2,6 sialyltransferase 2	protein coding gene	ENSMUSG00000024172	240119	Q76K27	Transfers sialic acid from the donor of substrate CMP-sialic acid to galactose containing acceptor substrates. Has alpha-2,6-sialyltransferase activity toward oligosaccharides that have the Gal-beta-1,4-GlcNAc sequence at the non-reducing end of their carbohydrate groups, but it has weak or no activities toward glycoproteins and glycolipids.	0	N-acetylneuraminate metabolic process [GO:0006054]; oligosaccharide metabolic process [GO:0009311]; protein glycosylation [GO:0006486]	beta-galactoside alpha-2,6-sialyltransferase activity [GO:0003835]; sialyltransferase activity [GO:0008373]	Glycosyltransferase 29 family
Kl	current symbol	MGI:1101771	Kl	klotho	protein coding gene	ENSMUSG00000058488	16591	O35082	May have weak glycosidase activity towards glucuronylated steroids. However, it lacks essential active site Glu residues at positions 241 and 874, suggesting it may be inactive as a glycosidase in vivo. May be involved in the regulation of calcium and phosphorus homeostasis by inhibiting the synthesis of active vitamin D. Essential factor for the specific interaction between FGF23 and FGFR1.; The…	0	acute inflammatory response [GO:0002526]; aging [GO:0007568]; calcium ion homeostasis [GO:0055074]; carbohydrate metabolic process [GO:0005975]; energy reserve metabolic process [GO:0006112]; fibroblast growth factor receptor signaling pathway [GO:0008543]; insulin receptor signaling pathway [GO:0008286]; negative regulation of systemic arterial blood pressure [GO:0003085]; norepinephrine biosynt…	beta-glucosidase activity [GO:0008422]; beta-glucuronidase activity [GO:0004566]; fibroblast growth factor binding [GO:0017134]; fibroblast growth factor receptor binding [GO:0005104]	Glycosyl hydrolase 1 family, Klotho subfamily
Gba	current symbol	MGI:95665	Gba	glucosidase, beta, acid	protein coding gene	ENSMUSG00000028048	14466	P17439	Glucosylceramidase that catalyzes, within the lysosomal compartment, the hydrolysis of glucosylceramide/GlcCer into free ceramide and glucose (PubMed:24211208). Thereby, plays a central role in the degradation of complex lipids and the turnover of cellular membranes (PubMed:27378698). Through the production of ceramides, participates in the PKC-activated salvage pathway of ceramide formation (By …	Steroid metabolism; cholesterol metabolism. {ECO:0000269|PubMed:24211208}.; Sphingolipid metabolism. {ECO:0000269|PubMed:24211208}.	antigen processing and presentation [GO:0019882]; autophagosome organization [GO:1905037]; autophagy [GO:0006914]; beta-glucoside catabolic process [GO:1901805]; brain morphogenesis [GO:0048854]; cell maturation [GO:0048469]; cellular response to starvation [GO:0009267]; cellular response to tumor necrosis factor [GO:0071356]; central nervous system development [GO:0007417]; ceramide biosynthetic…	beta-glucosidase activity [GO:0008422]; glucosylceramidase activity [GO:0004348]; glucosyltransferase activity [GO:0046527]; hydrolase activity [GO:0016787]; scavenger receptor binding [GO:0005124]; signaling receptor binding [GO:0005102]; steryl-beta-glucosidase activity [GO:0050295]	Glycosyl hydrolase 30 family
Gusb	current symbol	MGI:95872	Gusb	glucuronidase, beta	protein coding gene	ENSMUSG00000025534	110006	P12265	Plays an important role in the degradation of dermatan and keratan sulfates.	0	carbohydrate metabolic process [GO:0005975]; glucuronoside catabolic process [GO:0019391]	beta-glucuronidase activity [GO:0004566]; carbohydrate binding [GO:0030246]; hydrolase activity [GO:0016787]; protein domain specific binding [GO:0019904]; signaling receptor binding [GO:0005102]	Glycosyl hydrolase 2 family
Manba	current symbol	MGI:88175	Manba	mannosidase, beta A, lysosomal	protein coding gene	ENSMUSG00000028164	110173	Q8K2I4	Exoglycosidase that cleaves the single beta-linked mannose residue from the non-reducing end of all N-linked glycoprotein oligosaccharides. {ECO:0000269|PubMed:16377659}.	Glycan metabolism; N-glycan degradation. {ECO:0000269|PubMed:16377659}.	carbohydrate metabolic process [GO:0005975]; glycoprotein catabolic process [GO:0006516]	beta-mannosidase activity [GO:0004567]; hydrolase activity [GO:0016787]; mannose binding [GO:0005537]	Glycosyl hydrolase 2 family
B4galt2	current symbol	MGI:1858493	B4galt2	UDP-Gal:betaGlcNAc beta 1,4- galactosyltransferase, polypeptide 2	protein coding gene	ENSMUSG00000028541	53418	Q9Z2Y2	Responsible for the synthesis of complex-type N-linked oligosaccharides in many glycoproteins as well as the carbohydrate moieties of glycolipids. Can produce lactose (By similarity). {ECO:0000250|UniProtKB:O60909}.	Protein modification; protein glycosylation.	brain development [GO:0007420]; carbohydrate metabolic process [GO:0005975]; cerebellar Purkinje cell layer development [GO:0021680]; glycosylation [GO:0070085]; locomotory behavior [GO:0007626]; memory [GO:0007613]; protein glycosylation [GO:0006486]; visual learning [GO:0008542]	beta-N-acetylglucosaminylglycopeptide beta-1,4-galactosyltransferase activity [GO:0003831]; galactosyltransferase activity [GO:0008378]; lactose synthase activity [GO:0004461]; metal ion binding [GO:0046872]; N-acetyllactosamine synthase activity [GO:0003945]	Glycosyltransferase 7 family
B4galt7	current symbol	MGI:2384987	B4galt7	xylosylprotein beta1,4-galactosyltransferase, polypeptide 7 (galactosyltransferase I)	protein coding gene	ENSMUSG00000021504	218271	Q8R087	Required for the biosynthesis of the tetrasaccharide linkage region of proteoglycans, especially for small proteoglycans in skin fibroblasts. {ECO:0000250}.	Protein modification; protein glycosylation.	carbohydrate metabolic process [GO:0005975]; glycosaminoglycan biosynthetic process [GO:0006024]; glycosylation [GO:0070085]; negative regulation of fibroblast proliferation [GO:0048147]; protein N-linked glycosylation [GO:0006487]; proteoglycan biosynthetic process [GO:0030166]; proteoglycan metabolic process [GO:0006029]; supramolecular fiber organization [GO:0097435]	beta-N-acetylglucosaminylglycopeptide beta-1,4-galactosyltransferase activity [GO:0003831]; galactosyltransferase activity [GO:0008378]; manganese ion binding [GO:0030145]; xylosylprotein 4-beta-galactosyltransferase activity [GO:0046525]	Glycosyltransferase 7 family
B4galt3	current symbol	MGI:1928767	B4galt3	UDP-Gal:betaGlcNAc beta 1,4-galactosyltransferase, polypeptide 3	protein coding gene	ENSMUSG00000052423	57370	Q91YY2	Responsible for the synthesis of complex-type N-linked oligosaccharides in many glycoproteins as well as the carbohydrate moieties of glycolipids. {ECO:0000250|UniProtKB:O60512}.	Protein modification; protein glycosylation. {ECO:0000250|UniProtKB:O60512}.	carbohydrate metabolic process [GO:0005975]; galactosylceramide biosynthetic process [GO:0006682]; glycosylation [GO:0070085]; protein glycosylation [GO:0006486]	beta-N-acetylglucosaminylglycopeptide beta-1,4-galactosyltransferase activity [GO:0003831]; galactosyltransferase activity [GO:0008378]; metal ion binding [GO:0046872]; N-acetyllactosamine synthase activity [GO:0003945]	Glycosyltransferase 7 family
Pkd1l3	current symbol	MGI:2664670	Pkd1l3	polycystic kidney disease 1 like 3	protein coding gene	ENSMUSG00000048827	244646	Q2EG98	Component of a calcium channel. May act as a sour taste receptor by forming a calcium channel with PKD1L3 in gustatory cells; however, its contribution to sour taste perception is unclear in vivo and may be indirect. {ECO:0000269|PubMed:16805797, ECO:0000269|PubMed:16891422, ECO:0000269|PubMed:16929298, ECO:0000269|PubMed:21098668, ECO:0000269|PubMed:21625513}.	0	cation transport [GO:0006812]; cellular response to acidic pH [GO:0071468]; detection of chemical stimulus involved in sensory perception of sour taste [GO:0001581]; detection of mechanical stimulus [GO:0050982]; sensory perception of sour taste [GO:0050915]	calcium channel activity [GO:0005262]; calcium ion binding [GO:0005509]; carbohydrate binding [GO:0030246]	Polycystin family
Pkd1l2	current symbol	MGI:2664668	Pkd1l2	polycystic kidney disease 1 like 2	protein coding gene	ENSMUSG00000034416	76645	Q7TN88	May function as an ion-channel regulator. May function as a G-protein-coupled receptor (By similarity). {ECO:0000250}.	0	detection of mechanical stimulus [GO:0050982]	calcium channel activity [GO:0005262]; calcium ion binding [GO:0005509]; carbohydrate binding [GO:0030246]; G-protein alpha-subunit binding [GO:0001965]	Polycystin family
Pkd1	current symbol	MGI:97603	Pkd1	polycystin 1, transient receptor potential channel interacting	protein coding gene	ENSMUSG00000032855	18763	O08852	Component of a heteromeric calcium-permeable ion channel formed by PKD1 and PKD2 that is activated by interaction between PKD1 and a Wnt family member, such as WNT3A and WNT9B. Both PKD1 and PKD2 are required for channel activity (By similarity). Involved in renal tubulogenesis (PubMed:24939912). Involved in fluid-flow mechanosensation by the primary cilium in renal epithelium (PubMed:12514735). …	0	blood vessel development [GO:0001568]; branching morphogenesis of an epithelial tube [GO:0048754]; calcium ion transmembrane transport [GO:0070588]; calcium ion transport [GO:0006816]; cartilage condensation [GO:0001502]; cell-cell adhesion [GO:0098609]; cell-cell signaling by wnt [GO:0198738]; cytoplasmic sequestering of transcription factor [GO:0042994]; detection of mechanical stimulus [GO:005…	calcium channel activity [GO:0005262]; carbohydrate binding [GO:0030246]; cation channel activity [GO:0005261]; protein domain specific binding [GO:0019904]; protein kinase binding [GO:0019901]; transmembrane transporter binding [GO:0044325]; Wnt-activated receptor activity [GO:0042813]	Polycystin family
Cd93	current symbol	MGI:106664	Cd93	CD93 antigen	protein coding gene	ENSMUSG00000027435	17064	O89103	Receptor (or element of a larger receptor complex) for C1q, mannose-binding lectin (MBL2) and pulmonary surfactant protein A (SPA). May mediate the enhancement of phagocytosis in monocytes and macrophages upon interaction with soluble defense collagens. May play a role in intercellular adhesion. Marker for early multipotent hematopoietic precursor cells. May play a role in cell-cell interactions …	0	cell-cell adhesion [GO:0098609]	calcium ion binding [GO:0005509]; carbohydrate binding [GO:0030246]; complement component C1q complex binding [GO:0001849]	0
Apcs	current symbol	MGI:98229	Apcs	amyloid P component, serum	protein coding gene	ENSMUSG00000026542	20219	P12246	0	0	complement activation, classical pathway [GO:0006958]; innate immune response [GO:0045087]; negative regulation by host of viral exo-alpha-sialidase activity [GO:0044869]; negative regulation by host of viral glycoprotein metabolic process [GO:0044871]; negative regulation by host of viral process [GO:0044793]; negative regulation of exo-alpha-sialidase activity [GO:1903016]; negative regulation …	calcium ion binding [GO:0005509]; carbohydrate binding [GO:0030246]; complement component C1q complex binding [GO:0001849]; identical protein binding [GO:0042802]; low-density lipoprotein particle binding [GO:0030169]; virion binding [GO:0046790]	Pentraxin family
Cd248	current symbol	MGI:1917695	Cd248	CD248 antigen, endosialin	protein coding gene	ENSMUSG00000056481	70445	Q91V98	May play a role in angiogenesis or vascular function. {ECO:0000269|PubMed:11489895}.	0	anatomical structure regression [GO:0060033]; cell migration [GO:0016477]; lymph node development [GO:0048535]; positive regulation of cell population proliferation [GO:0008284]; positive regulation of endothelial cell apoptotic process [GO:2000353]	calcium ion binding [GO:0005509]; carbohydrate binding [GO:0030246]; extracellular matrix binding [GO:0050840]; extracellular matrix protein binding [GO:1990430]	0
Clec4e	current symbol	MGI:1861232	Clec4e	C-type lectin domain family 4, member e	protein coding gene	ENSMUSG00000030142	56619	Q9R0Q8	Calcium-dependent lectin that acts as a pattern recognition receptor (PRR) of the innate immune system: recognizes damage-associated molecular patterns (DAMPs) of abnormal self and pathogen-associated molecular patterns (PAMPs) of bacteria and fungi (PubMed:18509109, PubMed:18490740, PubMed:18776906, PubMed:20008526, PubMed:19171887, PubMed:23602766). The PAMPs notably include mycobacterial treha…	0	antifungal innate immune response [GO:0061760]; defense response to bacterium [GO:0042742]; Fc-gamma receptor signaling pathway [GO:0038094]; immune response [GO:0006955]; innate immune response [GO:0045087]; pattern recognition receptor signaling pathway [GO:0002221]; positive regulation of cytokine production [GO:0001819]; T cell differentiation involved in immune response [GO:0002292]	calcium ion binding [GO:0005509]; carbohydrate binding [GO:0030246]; glycolipid binding [GO:0051861]; pattern recognition receptor activity [GO:0038187]; signaling receptor activity [GO:0038023]	0
Clec3b	current symbol	MGI:104540	Clec3b	C-type lectin domain family 3, member b	protein coding gene	ENSMUSG00000025784	21922	P43025	Tetranectin binds to plasminogen and to isolated kringle 4. May be involved in the packaging of molecules destined for exocytosis (By similarity). {ECO:0000250}.	0	bone mineralization [GO:0030282]; ossification [GO:0001503]; positive regulation of plasminogen activation [GO:0010756]; skeletal system development [GO:0001501]	calcium ion binding [GO:0005509]; carbohydrate binding [GO:0030246]; heparin binding [GO:0008201]; kringle domain binding [GO:0036143]	0
Ncan	current symbol	MGI:104694	Ncan	neurocan	protein coding gene	ENSMUSG00000002341	13004	P55066	May modulate neuronal adhesion and neurite growth during development by binding to neural cell adhesion molecules (NG-CAM and N-CAM). Chondroitin sulfate proteoglycan; binds to hyaluronic acid.	0	cell adhesion [GO:0007155]; central nervous system development [GO:0007417]; regulation of synapse structural plasticity [GO:0051823]; skeletal system development [GO:0001501]	calcium ion binding [GO:0005509]; carbohydrate binding [GO:0030246]; hyaluronic acid binding [GO:0005540]	Aggrecan/versican proteoglycan family
Bcan	current symbol	MGI:1096385	Bcan	brevican	protein coding gene	ENSMUSG00000004892	12032	Q61361	May play a role in the terminally differentiating and the adult nervous system during postnatal development. Could stabilize interactions between hyaluronan (HA) and brain proteoglycans.	0	cell-matrix adhesion [GO:0007160]; central nervous system development [GO:0007417]; hippocampus development [GO:0021766]; neuron projection extension [GO:1990138]; skeletal system development [GO:0001501]; synapse maturation [GO:0060074]	calcium ion binding [GO:0005509]; carbohydrate binding [GO:0030246]; hyaluronic acid binding [GO:0005540]	Aggrecan/versican proteoglycan family
Vcan	current symbol	MGI:102889	Vcan	versican	protein coding gene	ENSMUSG00000021614	13003	Q62059	May play a role in intercellular signaling and in connecting cells with the extracellular matrix. May take part in the regulation of cell motility, growth and differentiation. Binds hyaluronic acid.	0	cell adhesion [GO:0007155]; central nervous system development [GO:0007417]; glial cell migration [GO:0008347]; heart development [GO:0007507]; regulation of phosphoprotein phosphatase activity [GO:0043666]; skeletal system development [GO:0001501]; ureteric bud development [GO:0001657]	calcium ion binding [GO:0005509]; carbohydrate binding [GO:0030246]; hyaluronic acid binding [GO:0005540]; protein phosphatase binding [GO:0019903]	Aggrecan/versican proteoglycan family
Cd69	current symbol	MGI:88343	Cd69	CD69 antigen	protein coding gene	ENSMUSG00000030156	12515	P37217	Involved in lymphocyte proliferation and functions as a signal transmitting receptor in lymphocytes, natural killer (NK) cells, and platelets.	0	cellular response to drug [GO:0035690]	calcium ion binding [GO:0005509]; carbohydrate binding [GO:0030246]; identical protein binding [GO:0042802]	0
Itln1	current symbol	MGI:1333831	Itln1	intelectin 1 (galactofuranose binding)	protein coding gene	ENSMUSG00000038209	16429	O88310	Lectin that specifically recognizes microbial carbohydrate chains in a calcium-dependent manner (PubMed:26148048). Binds to microbial glycans that contain a terminal acyclic 1,2-diol moiety, including beta-linked D-galactofuranose (beta-Galf), D-phosphoglycerol-modified glycans, D-glycero-D-talo-oct-2-ulosonic acid (KO) and 3-deoxy-D-manno-oct-2-ulosonic acid (KDO). Binds to glycans from Gram-pos…	0	positive regulation of glucose import [GO:0046326]; positive regulation of protein phosphorylation [GO:0001934]; protein homotrimerization [GO:0070207]; response to nematode [GO:0009624]	calcium ion binding [GO:0005509]; carbohydrate binding [GO:0030246]; identical protein binding [GO:0042802]; oligosaccharide binding [GO:0070492]	0
Tkt	current symbol	MGI:105992	Tkt	transketolase	protein coding gene	ENSMUSG00000021957	21881	P40142	Catalyzes the transfer of a two-carbon ketol group from a ketose donor to an aldose acceptor, via a covalent intermediate with the cofactor thiamine pyrophosphate. {ECO:0000250}.	0	glyceraldehyde-3-phosphate biosynthetic process [GO:0046166]; pentose-phosphate shunt [GO:0006098]; pentose-phosphate shunt, non-oxidative branch [GO:0009052]; regulation of growth [GO:0040008]; ribose phosphate biosynthetic process [GO:0046390]	calcium ion binding [GO:0005509]; carbohydrate binding [GO:0030246]; magnesium ion binding [GO:0000287]; monosaccharide binding [GO:0048029]; protein homodimerization activity [GO:0042803]; thiamine pyrophosphate binding [GO:0030976]; transketolase activity [GO:0004802]	Transketolase family
Galnt3	current symbol	MGI:894695	Galnt3	polypeptide N-acetylgalactosaminyltransferase 3	protein coding gene	ENSMUSG00000026994	14425	P70419	Catalyzes the initial reaction in O-linked oligosaccharide biosynthesis, the transfer of an N-acetyl-D-galactosamine residue to a serine or threonine residue on the protein receptor. Has activity toward HIV envelope glycoprotein gp120, EA2, Muc2 and Muc5. Glycosylates FGF23 (By similarity). Probably glycosylates fibronectin in vivo. May be involved in phosphate homeostasis. {ECO:0000250}.	Protein modification; protein glycosylation.	protein O-linked glycosylation via serine [GO:0018242]; protein O-linked glycosylation via threonine [GO:0018243]	calcium ion binding [GO:0005509]; carbohydrate binding [GO:0030246]; manganese ion binding [GO:0030145]; polypeptide N-acetylgalactosaminyltransferase activity [GO:0004653]	Glycosyltransferase 2 family, GalNAc-T subfamily
Clec4a2	current symbol	MGI:1349412	Clec4a2	C-type lectin domain family 4, member a2	protein coding gene	ENSMUSG00000030148	26888	Q9QZ15	May be involved in regulating immune reactivity. May play a role in modulating dendritic cells (DC) differentiation and/or maturation (By similarity). May be involved in the inhibition of B-cell-receptor-mediated calcium mobilization and protein tyrosine phosphorylation. {ECO:0000250, ECO:0000269|PubMed:11841542}.; C-type lectin receptor that binds carbohydrates mannose and fucose but also weakly…	0	adaptive immune response [GO:0002250]; antigen processing and presentation of exogenous peptide antigen via MHC class I [GO:0042590]; CD8-positive, alpha-beta T cell activation [GO:0036037]; innate immune response [GO:0045087]; negative regulation of cytokine production [GO:0001818]; negative regulation of tumor necrosis factor production [GO:0032720]; plasmacytoid dendritic cell antigen processi…	calcium ion binding [GO:0005509]; carbohydrate binding [GO:0030246]; mannose binding [GO:0005537]	0
Clec4n	current symbol	MGI:1861231	Clec4n	C-type lectin domain family 4, member n	protein coding gene	ENSMUSG00000023349	56620	Q9JKF4	Calcium-dependent lectin that acts as a pattern recognition receptor (PRR) of the innate immune system: specifically recognizes and binds alpha-mannans on C.albicans hypheas (PubMed:17050534, PubMed:19703985, PubMed:20493731). Binding of C.albicans alpha-mannans to this receptor complex leads to phosphorylation of the immunoreceptor tyrosine-based activation motif (ITAM) of FCER1G, triggering act…	0	adaptive immune response [GO:0002250]; antifungal innate immune response [GO:0061760]; defense response to fungus [GO:0050832]; detection of yeast [GO:0001879]; innate immune response [GO:0045087]; positive regulation of cytokine production [GO:0001819]; positive regulation of I-kappaB kinase/NF-kappaB signaling [GO:0043123]; positive regulation of intracellular signal transduction [GO:1902533]; …	calcium ion binding [GO:0005509]; carbohydrate binding [GO:0030246]; mannose binding [GO:0005537]; pattern recognition receptor activity [GO:0038187]	0
Sell	current symbol	MGI:98279	Sell	selectin, lymphocyte	protein coding gene	ENSMUSG00000026581	20343	P18337	Calcium-dependent lectin that mediates cell adhesion by binding to glycoproteins on neighboring cells. Mediates the adherence of lymphocytes to endothelial cells of high endothelial venules in peripheral lymph nodes (PubMed:1693096). Promotes initial tethering and rolling of leukocytes in endothelia (By similarity). {ECO:0000250|UniProtKB:P14151, ECO:0000269|PubMed:1693096}.	0	calcium-dependent cell-cell adhesion via plasma membrane cell adhesion molecules [GO:0016339]; leukocyte tethering or rolling [GO:0050901]; positive regulation of neutrophil chemotaxis [GO:0090023]; regulation of apoptotic process [GO:0042981]; response to ATP [GO:0033198]	calcium ion binding [GO:0005509]; cell adhesion molecule binding [GO:0050839]; glycolipid binding [GO:0051861]; oligosaccharide binding [GO:0070492]; protease binding [GO:0002020]	Selectin/LECAM family
Crp	current symbol	MGI:88512	Crp	C-reactive protein, pentraxin-related	protein coding gene	ENSMUSG00000037942	12944	P14847	Displays several functions associated with host defense: it promotes agglutination, bacterial capsular swelling, phagocytosis and complement fixation through its calcium-dependent binding to phosphorylcholine. Can interact with DNA and histones and may scavenge nuclear material released from damaged circulating cells.	0	acute-phase response [GO:0006953]; cellular response to calcium ion [GO:0071277]; complement activation, classical pathway [GO:0006958]; innate immune response [GO:0045087]; negative regulation by host of viral process [GO:0044793]; negative regulation of lipid storage [GO:0010888]; negative regulation of macrophage derived foam cell differentiation [GO:0010745]; negative regulation of mononuclea…	calcium ion binding [GO:0005509]; cholesterol binding [GO:0015485]; complement component C1q complex binding [GO:0001849]; identical protein binding [GO:0042802]; low-density lipoprotein particle binding [GO:0030169]; low-density lipoprotein particle receptor binding [GO:0050750]	Pentraxin family
Aspn	current symbol	MGI:1913945	Aspn	asporin	protein coding gene	ENSMUSG00000021388	66695	Q99MQ4	Binds calcium and plays a role in osteoblast-driven collagen biomineralization activity (By similarity). Critical regulator of TGF-beta in articular cartilage and plays an essential role in cartilage homeostasis and osteoarthritis (OA) pathogenesis. Negatively regulates chondrogenesis in the articular cartilage by blocking the TGF-beta/receptor interaction on the cell surface and inhibiting the c…	0	bone mineralization [GO:0030282]; negative regulation of tooth mineralization [GO:0070171]; negative regulation of transforming growth factor beta receptor signaling pathway [GO:0030512]	calcium ion binding [GO:0005509]; collagen binding [GO:0005518]	Small leucine-rich proteoglycan (SLRP) family, SLRP class I subfamily
Glce	current symbol	MGI:2136405	Glce	glucuronyl C5-epimerase	protein coding gene	ENSMUSG00000032252	93683	Q9EPS3	Converts D-glucuronic acid residues adjacent to N-sulfate sugar residues to L-iduronic acid residues, both in maturing heparan sulfate (HS) and heparin chains. This is important for further modifications that determine the specificity of interactions between these glycosaminoglycans and proteins. {ECO:0000269|PubMed:11274177, ECO:0000269|PubMed:11279150, ECO:0000269|PubMed:16532012, ECO:0000269|P…	Glycan metabolism; heparan sulfate biosynthesis. {ECO:0000305|PubMed:11274177, ECO:0000305|PubMed:11279150}.; Glycan metabolism; heparin biosynthesis. {ECO:0000305|PubMed:11274177, ECO:0000305|PubMed:11279150}.	heparan sulfate proteoglycan biosynthetic process [GO:0015012]; heparin biosynthetic process [GO:0030210]	calcium ion binding [GO:0005509]; heparosan-N-sulfate-glucuronate 5-epimerase activity [GO:0047464]; protein homodimerization activity [GO:0042803]; racemase and epimerase activity, acting on carbohydrates and derivatives [GO:0016857]; UDP-glucuronate 5'-epimerase activity [GO:0050379]	D-glucuronyl C5-epimerase family
Ids	current symbol	MGI:96417	Ids	iduronate 2-sulfatase	protein coding gene	ENSMUSG00000035847	15931	Q08890	Lysosomal enzyme involved in the degradation pathway of dermatan sulfate and heparan sulfate. {ECO:0000250|UniProtKB:P22304}.	0	glycosaminoglycan catabolic process [GO:0006027]	calcium ion binding [GO:0005509]; iduronate-2-sulfatase activity [GO:0004423]; sulfuric ester hydrolase activity [GO:0008484]	Sulfatase family
Edem3	current symbol	MGI:1914217	Edem3	ER degradation enhancer, mannosidase alpha-like 3	protein coding gene	ENSMUSG00000043019	66967	Q2HXL6	Involved in endoplasmic reticulum-associated degradation (ERAD). Accelerates the glycoprotein ERAD by proteasomes, by catalyzing mannose trimming from Man8GlcNAc2 to Man7GlcNAc2 in the N-glycans. Seems to have alpha 1,2-mannosidase activity. {ECO:0000250|UniProtKB:Q9BZQ6, ECO:0000269|PubMed:16431915}.	Protein modification; protein glycosylation. {ECO:0000250|UniProtKB:P32906}.	carbohydrate metabolic process [GO:0005975]; endoplasmic reticulum mannose trimming [GO:1904380]; glycoprotein catabolic process [GO:0006516]; mannose trimming involved in glycoprotein ERAD pathway [GO:1904382]; proteasome-mediated ubiquitin-dependent protein catabolic process [GO:0043161]; protein glycosylation [GO:0006486]; response to unfolded protein [GO:0006986]	calcium ion binding [GO:0005509]; mannosyl-oligosaccharide 1,2-alpha-mannosidase activity [GO:0004571]	Glycosyl hydrolase 47 family
Man1b1	current symbol	MGI:2684954	Man1b1	mannosidase, alpha, class 1B, member 1	protein coding gene	ENSMUSG00000036646	227619	A2AJ15	Involved in glycoprotein quality control targeting of misfolded glycoproteins for degradation. It primarily trims a single alpha-1,2-linked mannose residue from Man(9)GlcNAc(2) to produce Man(8)GlcNAc(2), but at high enzyme concentrations, as found in the ER quality control compartment (ERQC), it further trims the carbohydrates to Man(5-6)GlcNAc(2) (By similarity). {ECO:0000250}.	Protein modification; protein glycosylation. {ECO:0000250|UniProtKB:P32906}.	carbohydrate metabolic process [GO:0005975]; endoplasmic reticulum mannose trimming [GO:1904380]; mannose trimming involved in glycoprotein ERAD pathway [GO:1904382]; N-glycan processing [GO:0006491]; protein alpha-1,2-demannosylation [GO:0036508]; protein glycosylation [GO:0006486]; trimming of terminal mannose on B branch [GO:0036509]; ubiquitin-dependent ERAD pathway [GO:0030433]	calcium ion binding [GO:0005509]; mannosyl-oligosaccharide 1,2-alpha-mannosidase activity [GO:0004571]	Glycosyl hydrolase 47 family
Man1a2	current symbol	MGI:104676	Man1a2	mannosidase, alpha, class 1A, member 2	protein coding gene	ENSMUSG00000008763	17156	P39098	Involved in the maturation of Asn-linked oligosaccharides. Progressively trim alpha-1,2-linked mannose residues from Man(9)GlcNAc(2) to produce Man(5)GlcNAc(2).	Protein modification; protein glycosylation. {ECO:0000250|UniProtKB:P32906}.	carbohydrate metabolic process [GO:0005975]; glycoprotein metabolic process [GO:0009100]; lung alveolus development [GO:0048286]; N-glycan processing [GO:0006491]; protein glycosylation [GO:0006486]; respiratory gaseous exchange by respiratory system [GO:0007585]	calcium ion binding [GO:0005509]; mannosyl-oligosaccharide 1,2-alpha-mannosidase activity [GO:0004571]	Glycosyl hydrolase 47 family
Man1a	current symbol	MGI:104677	Man1a	mannosidase 1, alpha	protein coding gene	ENSMUSG00000003746	17155	P45700	Involved in the maturation of Asn-linked oligosaccharides. Progressively trim alpha-1,2-linked mannose residues from Man(9)GlcNAc(2) to produce Man(5)GlcNAc(2).	Protein modification; protein glycosylation. {ECO:0000250|UniProtKB:P32906}.	carbohydrate metabolic process [GO:0005975]; mannose trimming involved in glycoprotein ERAD pathway [GO:1904382]; N-glycan processing [GO:0006491]; protein glycosylation [GO:0006486]; protein targeting to ER [GO:0045047]; ubiquitin-dependent ERAD pathway [GO:0030433]	calcium ion binding [GO:0005509]; mannosyl-oligosaccharide 1,2-alpha-mannosidase activity [GO:0004571]	Glycosyl hydrolase 47 family
Edem2	current symbol	MGI:1915540	Edem2	ER degradation enhancer, mannosidase alpha-like 2	protein coding gene	ENSMUSG00000038312	108687	Q8BJT9	Involved in the endoplasmic reticulum-associated degradation (ERAD) pathway that targets misfolded glycoproteins for degradation in an N-glycan-dependent manner (PubMed:15579471, PubMed:25655076). May initiate ERAD by promoting the first mannose trimming step of ERAD substrates, from Man9GlcNAc2 to Man8GlcNAc2 (By similarity). Seems to recognize and bind to exposed hydrophobic regions in target p…	0	carbohydrate metabolic process [GO:0005975]; mannose trimming involved in glycoprotein ERAD pathway [GO:1904382]; positive regulation of retrograde protein transport, ER to cytosol [GO:1904154]; response to unfolded protein [GO:0006986]; trimming of terminal mannose on B branch [GO:0036509]; ubiquitin-dependent glycoprotein ERAD pathway [GO:0097466]	calcium ion binding [GO:0005509]; mannosyl-oligosaccharide 1,2-alpha-mannosidase activity [GO:0004571]	Glycosyl hydrolase 47 family
Man1c1	current symbol	MGI:2446214	Man1c1	mannosidase, alpha, class 1C, member 1	protein coding gene	ENSMUSG00000037306	230815	Q3UN34	0	0	mannose metabolic process [GO:0006013]; N-glycan processing [GO:0006491]; proteoglycan biosynthetic process [GO:0030166]	calcium ion binding [GO:0005509]; mannosyl-oligosaccharide 1,2-alpha-mannosidase activity [GO:0004571]	Glycosyl hydrolase 47 family
Edem1	current symbol	MGI:2180139	Edem1	ER degradation enhancer, mannosidase alpha-like 1	protein coding gene	ENSMUSG00000030104	192193	Q925U4	Extracts misfolded glycoproteins, but not glycoproteins undergoing productive folding, from the calnexin cycle. It is directly involved in endoplasmic reticulum-associated degradation (ERAD) and targets misfolded glycoproteins for degradation in an N-glycan-independent manner, probably by forming a complex with SEL1L. It has low mannosidase activity, catalyzing mannose trimming from Man8GlcNAc2 t…	0	carbohydrate metabolic process [GO:0005975]; mannose trimming involved in glycoprotein ERAD pathway [GO:1904382]; positive regulation of retrograde protein transport, ER to cytosol [GO:1904154]; protein targeting to ER [GO:0045047]; response to unfolded protein [GO:0006986]; trimming of terminal mannose on C branch [GO:0036510]; ubiquitin-dependent ERAD pathway [GO:0030433]; ubiquitin-dependent g…	calcium ion binding [GO:0005509]; mannosyl-oligosaccharide 1,2-alpha-mannosidase activity [GO:0004571]; misfolded protein binding [GO:0051787]	Glycosyl hydrolase 47 family
Sele	current symbol	MGI:98278	Sele	selectin, endothelial cell	protein coding gene	ENSMUSG00000026582	20339	Q00690	Cell-surface glycoprotein having a role in immunoadhesion. Mediates in the adhesion of blood neutrophils in cytokine-activated endothelium through interaction with SELPLG/PSGL1 (PubMed:1375914). May have a role in capillary morphogenesis. {ECO:0000250|UniProtKB:P16581, ECO:0000269|PubMed:1375914}.	0	actin filament-based process [GO:0030029]; activation of phospholipase C activity [GO:0007202]; heterophilic cell-cell adhesion via plasma membrane cell adhesion molecules [GO:0007157]; inflammatory response [GO:0006954]; leukocyte cell-cell adhesion [GO:0007159]; leukocyte tethering or rolling [GO:0050901]; positive regulation of leukocyte migration [GO:0002687]; positive regulation of leukocyte…	calcium ion binding [GO:0005509]; oligosaccharide binding [GO:0070492]; phospholipase binding [GO:0043274]; sialic acid binding [GO:0033691]; transmembrane signaling receptor activity [GO:0004888]	Selectin/LECAM family
Prkcsh	current symbol	MGI:107877	Prkcsh	protein kinase C substrate 80K-H	protein coding gene	ENSMUSG00000003402	19089	O08795	Regulatory subunit of glucosidase II that cleaves sequentially the 2 innermost alpha-1,3-linked glucose residues from the Glc(2)Man(9)GlcNAc(2) oligosaccharide precursor of immature glycoproteins (PubMed:27462106, PubMed:9148925). Required for efficient PKD1/Polycystin-1 biogenesis and trafficking to the plasma membrane of the primary cilia (PubMed:21685914). {ECO:0000269|PubMed:21685914, ECO:000…	Glycan metabolism; N-glycan metabolism. {ECO:0000269|PubMed:27462106}.	in utero embryonic development [GO:0001701]; liver development [GO:0001889]; negative regulation of neuron projection development [GO:0010977]; N-glycan processing [GO:0006491]; nitrogen compound metabolic process [GO:0006807]	calcium ion binding [GO:0005509]; phosphoprotein binding [GO:0051219]; protein-containing complex binding [GO:0044877]; protein kinase C binding [GO:0005080]; RNA binding [GO:0003723]; transmembrane transporter binding [GO:0044325]	0
Hspg2	current symbol	MGI:96257	Hspg2	perlecan (heparan sulfate proteoglycan 2)	protein coding gene	ENSMUSG00000028763	15530	Q05793	Integral component of basement membranes. Component of the glomerular basement membrane (GBM), responsible for the fixed negative electrostatic membrane charge, and which provides a barrier which is both size- and charge-selective. It serves as an attachment substrate for cells. Plays essential roles in vascularization. Critical for normal heart development and for regulating the vascular respons…	0	angiogenesis [GO:0001525]; animal organ morphogenesis [GO:0009887]; brain development [GO:0007420]; cardiac muscle tissue development [GO:0048738]; cartilage development involved in endochondral bone morphogenesis [GO:0060351]; chondrocyte differentiation [GO:0002062]; embryonic skeletal system morphogenesis [GO:0048704]; endochondral ossification [GO:0001958]; extracellular matrix organization […	calcium ion binding [GO:0005509]; protease binding [GO:0002020]; protein C-terminus binding [GO:0008022]	0
Clgn	current symbol	MGI:107472	Clgn	calmegin	protein coding gene	ENSMUSG00000002190	12745	P52194	Functions during spermatogenesis as a chaperone for a range of client proteins that are important for sperm adhesion onto the egg zona pellucida and for subsequent penetration of the zona pellucida. Required for normal sperm migration from the uterus into the oviduct. Required for normal male fertility. Binds calcium ions. {ECO:0000269|PubMed:11784061, ECO:0000269|PubMed:15151931, ECO:0000269|Pub…	0	binding of sperm to zona pellucida [GO:0007339]; cell differentiation [GO:0030154]; endoplasmic reticulum unfolded protein response [GO:0030968]; meiotic cell cycle [GO:0051321]; protein-containing complex assembly [GO:0065003]; protein folding [GO:0006457]; single fertilization [GO:0007338]; spermatogenesis [GO:0007283]	calcium ion binding [GO:0005509]; protein folding chaperone [GO:0044183]; unfolded protein binding [GO:0051082]	Calreticulin family
Calr3	current symbol	MGI:1920566	Calr3	calreticulin 3	protein coding gene	ENSMUSG00000019732	73316	Q9D9Q6	CALR3 capacity for calcium-binding may be absent or much lower than that of CALR (By similarity). During spermatogenesis, may act as a lectin-independent chaperone for specific client proteins such as ADAM3. Required for sperm fertility. {ECO:0000250, ECO:0000269|PubMed:21131354}.	0	cell differentiation [GO:0030154]; endoplasmic reticulum unfolded protein response [GO:0030968]; protein folding [GO:0006457]; spermatogenesis [GO:0007283]	calcium ion binding [GO:0005509]; protein folding chaperone [GO:0044183]; unfolded protein binding [GO:0051082]	Calreticulin family
Thbd	current symbol	MGI:98736	Thbd	thrombomodulin	protein coding gene	ENSMUSG00000074743	21824	P15306	Thrombomodulin is a specific endothelial cell receptor that forms a 1:1 stoichiometric complex with thrombin. This complex is responsible for the conversion of protein C to the activated protein C (protein Ca). Once evolved, protein Ca scissions the activated cofactors of the coagulation mechanism, factor Va and factor VIIIa, and thereby reduces the amount of thrombin generated.	0	blood coagulation [GO:0007596]; female pregnancy [GO:0007565]; negative regulation of blood coagulation [GO:0030195]; negative regulation of coagulation [GO:0050819]; response to cAMP [GO:0051591]; response to lipopolysaccharide [GO:0032496]; response to X-ray [GO:0010165]	calcium ion binding [GO:0005509]; transmembrane signaling receptor activity [GO:0004888]	0
Colec11	current symbol	MGI:1918943	Colec11	collectin sub-family member 11	protein coding gene	ENSMUSG00000036655	71693	Q3SXB8	Lectin that plays a role in innate immunity, apoptosis and embryogenesis. Calcium-dependent lectin that binds self and non-self glycoproteins presenting high mannose oligosaccharides with at least one terminal alpha-1,2-linked mannose epitope. Primarily recognizes the terminal disaccharide of the glycan. Also recognizes a subset of fucosylated glycans and lipopolysaccharides. Plays a role in inna…	0	antimicrobial humoral response [GO:0019730]; complement activation [GO:0006956]; complement activation, lectin pathway [GO:0001867]; developmental process [GO:0032502]	calcium-dependent carbohydrate binding [GO:0120153]; calcium ion binding [GO:0005509]; DNA binding [GO:0003677]; fucose binding [GO:0042806]; mannose binding [GO:0005537]; oligosaccharide binding [GO:0070492]	COLEC10/COLEC11 family
Anxa5	current symbol	MGI:106008	Anxa5	annexin A5	protein coding gene	ENSMUSG00000027712	11747	P48036	This protein is an anticoagulant protein that acts as an indirect inhibitor of the thromboplastin-specific complex, which is involved in the blood coagulation cascade.	0	blood coagulation [GO:0007596]; cellular response to gonadotropin-releasing hormone [GO:0097211]; negative regulation of blood coagulation [GO:0030195]; negative regulation of prolactin secretion [GO:1902721]; positive regulation of apoptotic process [GO:0043065]; regulation of flagellated sperm motility [GO:1901317]; response to calcium ion [GO:0051592]; response to organic substance [GO:0010033]	calcium-dependent phospholipid binding [GO:0005544]; calcium ion binding [GO:0005509]; identical protein binding [GO:0042802]; peptide hormone binding [GO:0017046]; P-type calcium transporter activity [GO:0005388]; receptor tyrosine kinase binding [GO:0030971]	Annexin family
Anxa4	current symbol	MGI:88030	Anxa4	annexin A4	protein coding gene	ENSMUSG00000029994	11746	P97429	Calcium/phospholipid-binding protein which promotes membrane fusion and is involved in exocytosis. {ECO:0000250}.	0	epithelial cell differentiation [GO:0030855]; kidney development [GO:0001822]; negative regulation of interleukin-8 production [GO:0032717]; negative regulation of NF-kappaB transcription factor activity [GO:0032088]; Notch signaling pathway [GO:0007219]; regulation of transcription by RNA polymerase II [GO:0006357]	calcium-dependent phospholipid binding [GO:0005544]; calcium-dependent protein binding [GO:0048306]; calcium ion binding [GO:0005509]; identical protein binding [GO:0042802]; NF-kappaB binding [GO:0051059]	Annexin family
Masp2	current symbol	MGI:1330832	Masp2	mannan-binding lectin serine peptidase 2	protein coding gene	ENSMUSG00000028979	17175	Q91WP0	Serum protease that plays an important role in the activation of the complement system via mannose-binding lectin. After activation by auto-catalytic cleavage it cleaves C2 and C4, leading to their activation and to the formation of C3 convertase (By similarity). {ECO:0000250}.	0	complement activation, classical pathway [GO:0006958]; complement activation, lectin pathway [GO:0001867]	calcium-dependent protein binding [GO:0048306]; calcium ion binding [GO:0005509]; complement component C4b binding [GO:0001855]; identical protein binding [GO:0042802]; peptidase activity [GO:0008233]; serine-type endopeptidase activity [GO:0004252]	Peptidase S1 family
Selp	current symbol	MGI:98280	Selp	selectin, platelet	protein coding gene	ENSMUSG00000026580	20344	Q01102	Ca(2+)-dependent receptor for myeloid cells that binds to carbohydrates on neutrophils and monocytes. Mediates the interaction of activated endothelial cells or platelets with leukocytes. The ligand recognized is sialyl-Lewis X. Mediates rapid rolling of leukocyte rolling over vascular surfaces during the initial steps in inflammation through interaction with SELPLG. {ECO:0000250|UniProtKB:P16109…	0	calcium-dependent cell-cell adhesion via plasma membrane cell adhesion molecules [GO:0016339]; calcium-mediated signaling using intracellular calcium source [GO:0035584]; cell-cell adhesion [GO:0098609]; cellular response to interleukin-6 [GO:0071354]; heterophilic cell-cell adhesion via plasma membrane cell adhesion molecules [GO:0007157]; inflammatory response [GO:0006954]; leukocyte cell-cell …	calcium-dependent protein binding [GO:0048306]; calcium ion binding [GO:0005509]; fucose binding [GO:0042806]; heparin binding [GO:0008201]; lipopolysaccharide binding [GO:0001530]; oligosaccharide binding [GO:0070492]; sialic acid binding [GO:0033691]	Selectin/LECAM family
Mbl2	current symbol	MGI:96924	Mbl2	mannose-binding lectin (protein C) 2	protein coding gene	ENSMUSG00000024863	17195	P41317	Calcium-dependent lectin involved in innate immune defense. Binds mannose, fucose and N-acetylglucosamine on different microorganisms and activates the lectin complement pathway. Binds to late apoptotic cells, as well as to apoptotic blebs and to necrotic cells, but not to early apoptotic cells, facilitating their uptake by macrophages (By similarity). {ECO:0000250}.	0	complement activation, classical pathway [GO:0006958]; complement activation, lectin pathway [GO:0001867]; defense response to Gram-positive bacterium [GO:0050830]; innate immune response [GO:0045087]; killing by host of symbiont cells [GO:0051873]; negative regulation of viral process [GO:0048525]; positive regulation of phagocytosis [GO:0050766]	calcium-dependent protein binding [GO:0048306]; calcium ion binding [GO:0005509]; galactose binding [GO:0005534]; identical protein binding [GO:0042802]; mannose binding [GO:0005537]; phosphatidylinositol-4-phosphate binding [GO:0070273]; protease binding [GO:0002020]; protein self-association [GO:0043621]; signaling receptor binding [GO:0005102]	0
Cd209a	current symbol	MGI:2157942	Cd209a	CD209a antigen	protein coding gene	ENSMUSG00000031494	170786	Q91ZX1	Probable pathogen-recognition receptor. May mediate the endocytosis of pathogens which are subsequently degraded in lysosomal compartments. May recognize in a calcium-dependent manner high mannose N-linked oligosaccharides in a variety of pathogen antigens.	0	endocytosis [GO:0006897]; regulation of T cell proliferation [GO:0042129]; viral entry into host cell [GO:0046718]	calcium-dependent protein binding [GO:0048306]; carbohydrate binding [GO:0030246]; carbohydrate derivative binding [GO:0097367]; mannose binding [GO:0005537]; metal ion binding [GO:0046872]; virus receptor activity [GO:0001618]	0
Clec2l	current symbol	MGI:2141402	Clec2l	C-type lectin domain family 2, member L	protein coding gene	ENSMUSG00000079598	665180	P0C7M9	0	0	0	carbohydrate binding [GO:0030246]	0
Klrb1a	current symbol	MGI:107540	Klrb1a	killer cell lectin-like receptor subfamily B member 1A	protein coding gene	ENSMUSG00000030361	17057	P27811	Plays a stimulatory role on natural killer (NK) cell cytotoxicity. {ECO:0000269|PubMed:16751398}.	0	0	carbohydrate binding [GO:0030246]	0
Clec1a	current symbol	MGI:2444151	Clec1a	C-type lectin domain family 1, member a	protein coding gene	ENSMUSG00000033082	243653	Q8BWY2	0	0	0	carbohydrate binding [GO:0030246]	0
Klrg2	current symbol	MGI:1921503	Klrg2	killer cell lectin-like receptor subfamily G, member 2	protein coding gene	ENSMUSG00000071537	74253	Q3UM83	0	0	0	carbohydrate binding [GO:0030246]	0
Galnt9	current symbol	MGI:2677965	Galnt9	polypeptide N-acetylgalactosaminyltransferase 9	protein coding gene	ENSMUSG00000033316	231605	A0A0G2JGP7	0	0	0	carbohydrate binding [GO:0030246]	0
Atrnl1	current symbol	MGI:2147749	Atrnl1	attractin like 1	protein coding gene	ENSMUSG00000054843	226255	Q6A051	May play a role in melanocortin signaling pathways that regulate energy homeostasis. {ECO:0000250}.	0	animal organ morphogenesis [GO:0009887]; cell migration [GO:0016477]; G protein-coupled receptor signaling pathway [GO:0007186]; substrate adhesion-dependent cell spreading [GO:0034446]; tissue development [GO:0009888]	carbohydrate binding [GO:0030246]	0
Prg3	current symbol	MGI:1858200	Prg3	proteoglycan 3	protein coding gene	ENSMUSG00000027072	53856	Q9JL95	Possesses similar cytotoxic and cytostimulatory activities to PRG2/MBP. {ECO:0000250}.	0	basophil activation [GO:0045575]; histamine biosynthetic process [GO:0001694]; immune response [GO:0006955]; leukotriene biosynthetic process [GO:0019370]; negative regulation of translation [GO:0017148]; neutrophil activation [GO:0042119]; positive regulation of interleukin-8 production [GO:0032757]; superoxide anion generation [GO:0042554]	carbohydrate binding [GO:0030246]	0
Asgr2	current symbol	MGI:88082	Asgr2	asialoglycoprotein receptor 2	protein coding gene	ENSMUSG00000040963	11890	P24721	Mediates the endocytosis of plasma glycoproteins to which the terminal sialic acid residue on their complex carbohydrate moieties has been removed. The receptor recognizes terminal galactose and N-acetylgalactosamine units. After ligand binding to the receptor, the resulting complex is internalized and transported to a sorting organelle, where receptor and ligand are disassociated. The receptor t…	0	bone mineralization [GO:0030282]; endocytosis [GO:0006897]; glycoprotein metabolic process [GO:0009100]; lipid homeostasis [GO:0055088]; regulation of protein stability [GO:0031647]	carbohydrate binding [GO:0030246]	0
Dgcr2	current symbol	MGI:892866	Dgcr2	DiGeorge syndrome critical region gene 2	protein coding gene	ENSMUSG00000003166	13356	P98154	Probably plays a role in neural crest cell migration. May play a role in delivery of extracellular signals.	0	cell adhesion [GO:0007155]; cognition [GO:0050890]; response to drug [GO:0042493]	carbohydrate binding [GO:0030246]	0
Klrg1	current symbol	MGI:1355294	Klrg1	killer cell lectin-like receptor subfamily G, member 1	protein coding gene	ENSMUSG00000030114	50928	O88713	Plays an inhibitory role on natural killer (NK) cells and T-cell functions upon binding to their non-MHC ligands. May mediate missing self recognition by binding to a highly conserved site on classical cadherins, enabling it to monitor expression of E-cadherin/CDH1, N-cadherin/CDH2 and R-cadherin/CDH4 on target cells. {ECO:0000269|PubMed:19604491}.	0	cell surface receptor signaling pathway [GO:0007166]; innate immune response [GO:0045087]	carbohydrate binding [GO:0030246]	0
Clec10a	current symbol	MGI:96975	Clec10a	C-type lectin domain family 10, member A	protein coding gene	ENSMUSG00000000318	17312	P49300	Recognizes terminal galactose and N-acetylgalactosamine units. May participate in the interaction between tumoricidal macrophages and tumor cells. Plays a role in the recruitment of inflammatory monocytes to adipose tissue in diet-induced obesity. {ECO:0000269|PubMed:19995956}.	0	connective tissue replacement involved in inflammatory response wound healing [GO:0002248]	carbohydrate binding [GO:0030246]	0
Prg2	current symbol	MGI:103294	Prg2	proteoglycan 2, bone marrow	protein coding gene	ENSMUSG00000027073	19074	Q61878	Cytotoxin and helminthotoxin. MBP also induces non-cytolytic histamine release from basophils. It is involved in antiparasitic defense mechanisms and immune hypersensitivity reactions (By similarity). {ECO:0000250}.	0	defense response to bacterium [GO:0042742]; defense response to nematode [GO:0002215]; negative regulation of interleukin-10 production [GO:0032693]; positive regulation of interleukin-4 production [GO:0032753]	carbohydrate binding [GO:0030246]	0
Cd207	current symbol	MGI:2180021	Cd207	CD207 antigen	protein coding gene	ENSMUSG00000034783	246278	Q8VBX4	Calcium-dependent lectin displaying mannose-binding specificity. Induces the formation of Birbeck granules (BGs); is a potent regulator of membrane superimposition and zippering. Binds to sulfated as well as mannosylated glycans, keratan sulfate (KS) and beta-glucans. Facilitates uptake of antigens and is involved in the routing and/or processing of antigen for presentation to T cells. {ECO:00002…	0	defense response to virus [GO:0051607]	carbohydrate binding [GO:0030246]	0
Fbxo6	current symbol	MGI:1354743	Fbxo6	F-box protein 6	protein coding gene	ENSMUSG00000055401	50762	Q9QZN4	Substrate-recognition component of some SCF (SKP1-CUL1-F-box protein)-type E3 ubiquitin ligase complexes. Involved in DNA damage response by specifically recognizing activated CHEK1 (phosphorylated on 'Ser-345'), promoting its ubiquitination and degradation. Ubiquitination of CHEK1 is required to insure that activated CHEK1 does not accumulate as cells progress through S phase, or when replicatio…	Protein modification; protein ubiquitination.	DNA repair [GO:0006281]; glycoprotein catabolic process [GO:0006516]; protein ubiquitination [GO:0016567]; response to unfolded protein [GO:0006986]; SCF-dependent proteasomal ubiquitin-dependent protein catabolic process [GO:0031146]; ubiquitin-dependent ERAD pathway [GO:0030433]; ubiquitin-dependent glycoprotein ERAD pathway [GO:0097466]	carbohydrate binding [GO:0030246]	0
Clec3a	current symbol	MGI:2685642	Clec3a	C-type lectin domain family 3, member a	protein coding gene	ENSMUSG00000008874	403395	Q9EPW4	Promotes cell adhesion to laminin and fibronectin. {ECO:0000250}.	0	ossification [GO:0001503]	carbohydrate binding [GO:0030246]	0
Chodl	current symbol	MGI:2179069	Chodl	chondrolectin	protein coding gene	ENSMUSG00000022860	246048	Q9CXM0	May play a role in the development of the nervous system such as in neurite outgrowth and elongation (PubMed:24067532). May be involved in motor axon growth and guidance (By similarity). {ECO:0000250|UniProtKB:Q568T5, ECO:0000305|PubMed:24067532}.	0	positive regulation of axonogenesis [GO:0050772]; regulation of neuron projection development [GO:0010975]	carbohydrate binding [GO:0030246]	0
Clec9a	current symbol	MGI:2444608	Clec9a	C-type lectin domain family 9, member a	protein coding gene	ENSMUSG00000046080	232414	Q8BRU4	Functions as an endocytic receptor on a small subset of myeloid cells specialized for the uptake and processing of material from dead cells. Recognizes filamentous form of actin in association with particular actin-binding domains of cytoskeletal proteins, including spectrin, exposed when cell membranes are damaged, and mediate the cross-presentation of dead-cell associated antigens in a Syk-depe…	0	positive regulation of cytokine production [GO:0001819]; receptor-mediated endocytosis [GO:0006898]	carbohydrate binding [GO:0030246]	0
Clec4b1	current symbol	MGI:1917060	Clec4b1	C-type lectin domain family 4, member b1	protein coding gene	ENSMUSG00000030147	69810	Q7TS58	0	0	positive regulation of release of sequestered calcium ion into cytosol [GO:0051281]	carbohydrate binding [GO:0030246]	0
Cd22	current symbol	MGI:88322	Cd22	CD22 antigen	protein coding gene	ENSMUSG00000030577	12483	P35329	Mediates B-cell B-cell interactions. May be involved in the localization of B-cells in lymphoid tissues. Binds sialylated glycoproteins; one of which is CD45. Preferentially binds to alpha-2,6-linked sialic acid. The sialic acid recognition site can be masked by cis interactions with sialic acids on the same cell surface. Upon ligand induced tyrosine phosphorylation in the immune response seems t…	0	B cell activation [GO:0042113]; cell adhesion [GO:0007155]; cell surface receptor signaling pathway [GO:0007166]; negative regulation of B cell receptor signaling pathway [GO:0050859]; negative regulation of calcium-mediated signaling [GO:0050849]; negative regulation of immunoglobulin production [GO:0002638]; regulation of B cell proliferation [GO:0030888]; regulation of endocytosis [GO:0030100]…	carbohydrate binding [GO:0030246]; CD4 receptor binding [GO:0042609]; coreceptor activity [GO:0015026]; protein phosphatase binding [GO:0019903]; sialic acid binding [GO:0033691]	Immunoglobulin superfamily, SIGLEC (sialic acid binding Ig-like lectin) family
Mrc2	current symbol	MGI:107818	Mrc2	mannose receptor, C type 2	protein coding gene	ENSMUSG00000020695	17534	Q64449	May play a role as endocytotic lectin receptor displaying calcium-dependent lectin activity. Internalizes glycosylated ligands from the extracellular space for release in an endosomal compartment via clathrin-mediated endocytosis. May be involved in plasminogen activation system controlling the extracellular level of PLAUR/PLAU, and thus may regulate protease activity at the cell surface. May con…	0	collagen catabolic process [GO:0030574]; endocytosis [GO:0006897]	carbohydrate binding [GO:0030246]; collagen binding [GO:0005518]; signaling receptor activity [GO:0038023]	0
Lgals9	current symbol	MGI:109496	Lgals9	lectin, galactose binding, soluble 9	protein coding gene	ENSMUSG00000001123	16859	O08573	Binds galactosides (By similarity). Has high affinity for the Forssman pentasaccharide (By similarity). Ligand for HAVCR2/TIM3 (By similarity). Binding to HAVCR2 induces T-helper type 1 lymphocyte (Th1) death (By similarity). Also stimulates bactericidal activity in infected macrophages by causing macrophage activation and IL1B secretion which restricts intracellular bacterial growth (PubMed:2093…	0	cellular response to virus [GO:0098586]; chemotaxis [GO:0006935]; female pregnancy [GO:0007565]; heterophilic cell-cell adhesion via plasma membrane cell adhesion molecules [GO:0007157]; immune system process [GO:0002376]; maintenance of protein location [GO:0045185]; negative regulation of CD4-positive, alpha-beta T cell proliferation [GO:2000562]; negative regulation of gene expression [GO:0010…	carbohydrate binding [GO:0030246]; enzyme binding [GO:0019899]; galactoside binding [GO:0016936]; protein serine/threonine kinase activator activity [GO:0043539]; signaling receptor binding [GO:0005102]	0
Clec14a	current symbol	MGI:1914114	Clec14a	C-type lectin domain family 14, member a	protein coding gene	ENSMUSG00000045930	66864	Q8VCP9	0	0	cell migration [GO:0016477]; cell migration involved in sprouting angiogenesis [GO:0002042]; lymphangiogenesis [GO:0001946]; sprouting angiogenesis [GO:0002040]; vascular endothelial growth factor receptor-2 signaling pathway [GO:0036324]; vascular endothelial growth factor receptor-3 signaling pathway [GO:0036325]	carbohydrate binding [GO:0030246]; extracellular matrix binding [GO:0050840]; extracellular matrix protein binding [GO:1990430]	0
Lgals1	current symbol	MGI:96777	Lgals1	lectin, galactose binding, soluble 1	protein coding gene	ENSMUSG00000068220	16852	P16045	Lectin that binds beta-galactoside and a wide array of complex carbohydrates. Plays a role in regulating apoptosis, cell proliferation and cell differentiation. Inhibits CD45 protein phosphatase activity and therefore the dephosphorylation of Lyn kinase. Strong inducer of T-cell apoptosis. {ECO:0000250|UniProtKB:P09382, ECO:0000269|PubMed:1986871}.	0	apoptotic process [GO:0006915]; cellular response to glucose stimulus [GO:0071333]; cellular response to organic cyclic compound [GO:0071407]; heterophilic cell-cell adhesion via plasma membrane cell adhesion molecules [GO:0007157]; myoblast differentiation [GO:0045445]; negative regulation of cell-substrate adhesion [GO:0010812]; negative regulation of neuron projection development [GO:0010977];…	carbohydrate binding [GO:0030246]; galactose binding [GO:0005534]; identical protein binding [GO:0042802]; lactose binding [GO:0030395]; laminin binding [GO:0043236]	0
Lgals2	current symbol	MGI:895068	Lgals2	lectin, galactose-binding, soluble 2	protein coding gene	ENSMUSG00000043501	107753	Q9CQW5	This protein binds beta-galactoside. Its physiological function is not yet known.	0	0	carbohydrate binding [GO:0030246]; galactoside binding [GO:0016936]	0
Lgals4	current symbol	MGI:107536	Lgals4	lectin, galactose binding, soluble 4	protein coding gene	ENSMUSG00000053964	16855	Q8K419	Galectin that binds lactose and a related range of sugars. {ECO:0000250}.	0	0	carbohydrate binding [GO:0030246]; galactoside binding [GO:0016936]	0
Lgals7	current symbol	MGI:1316742	Lgals7	lectin, galactose binding, soluble 7	protein coding gene	ENSMUSG00000053522	16858	O54974	Could be involved in cell-cell and/or cell-matrix interactions necessary for normal growth control. Pro-apoptotic protein that functions intracellularly upstream of JNK activation and cytochrome c release (By similarity). {ECO:0000250}.	0	apoptotic process [GO:0006915]; heterophilic cell-cell adhesion via plasma membrane cell adhesion molecules [GO:0007157]; negative regulation of CD4-positive, alpha-beta T cell proliferation [GO:2000562]; negative regulation of interferon-gamma production [GO:0032689]; positive regulation of gene expression [GO:0010628]	carbohydrate binding [GO:0030246]; galactoside binding [GO:0016936]	0
Mag	current symbol	MGI:96912	Mag	myelin-associated glycoprotein	protein coding gene	ENSMUSG00000036634	17136	P20917	Adhesion molecule that mediates interactions between myelinating cells and neurons by binding to neuronal sialic acid-containing gangliosides and to the glycoproteins RTN4R and RTN4RL2 (PubMed:7533044, PubMed:12089450, PubMed:27922006). Not required for initial myelination, but seems to play a role in the maintenance of normal axon myelination (PubMed:7516497, PubMed:9262180, PubMed:9482781, PubM…	0	axon regeneration [GO:0031103]; cell adhesion [GO:0007155]; cell-cell adhesion via plasma-membrane adhesion molecules [GO:0098742]; cellular response to mechanical stimulus [GO:0071260]; central nervous system myelination [GO:0022010]; negative regulation of axon extension [GO:0030517]; negative regulation of neuron apoptotic process [GO:0043524]; negative regulation of neuron differentiation [GO…	carbohydrate binding [GO:0030246]; ganglioside GT1b binding [GO:1905576]; protein homodimerization activity [GO:0042803]; protein kinase binding [GO:0019901]; sialic acid binding [GO:0033691]; signaling receptor binding [GO:0005102]	Immunoglobulin superfamily, SIGLEC (sialic acid binding Ig-like lectin) family
Clec11a	current symbol	MGI:1298219	Clec11a	C-type lectin domain family 11, member a	protein coding gene	ENSMUSG00000004473	20256	O88200	Promotes osteogenesis by stimulating the differentiation of mesenchymal progenitors into mature osteoblasts. Important for repair and maintenance of adult bone. {ECO:0000269|PubMed:27976999}.	0	ossification [GO:0001503]; positive regulation of cell population proliferation [GO:0008284]	carbohydrate binding [GO:0030246]; growth factor activity [GO:0008083]	0
Lman2	current symbol	MGI:1914140	Lman2	lectin, mannose-binding 2	protein coding gene	ENSMUSG00000021484	66890	Q9DBH5	Plays a role as an intracellular lectin in the early secretory pathway. Interacts with N-acetyl-D-galactosamine and high-mannose type glycans and may also bind to O-linked glycans. Involved in the transport and sorting of glycoproteins carrying high mannose-type glycans (By similarity). {ECO:0000250}.	0	endoplasmic reticulum organization [GO:0007029]; endoplasmic reticulum to Golgi vesicle-mediated transport [GO:0006888]; Golgi organization [GO:0007030]; positive regulation of phagocytosis [GO:0050766]; protein transport [GO:0015031]; retrograde vesicle-mediated transport, Golgi to endoplasmic reticulum [GO:0006890]	carbohydrate binding [GO:0030246]; heat shock protein binding [GO:0031072]; mannose binding [GO:0005537]; metal ion binding [GO:0046872]	0
Klrd1	current symbol	MGI:1196275	Klrd1	killer cell lectin-like receptor, subfamily D, member 1	protein coding gene	ENSMUSG00000030165	16643	O54707	Immune receptor involved in self-nonself discrimination. In complex with KLRC1 or KLRC2 on cytotoxic and regulatory lymphocyte subsets, recognizes non-classical major histocompatibility (MHC) class Ib molecule MHC-E loaded with self-peptides derived from the signal sequence of classical MHC class Ia and non-classical MHC class Ib molecules. Enables cytotoxic cells to monitor the expression of MHC…	0	adaptive immune response [GO:0002250]; natural killer cell mediated immunity [GO:0002228]; negative regulation of natural killer cell mediated cytotoxicity [GO:0045953]; negative regulation of T cell mediated cytotoxicity [GO:0001915]; positive regulation of natural killer cell mediated cytotoxicity [GO:0045954]; stimulatory C-type lectin receptor signaling pathway [GO:0002223]	carbohydrate binding [GO:0030246]; HLA-E specific inhibitory MHC class Ib receptor activity [GO:0062082]; MHC class Ib protein binding, via antigen binding groove [GO:0023030]; MHC class I protein complex binding [GO:0023024]; protein antigen binding [GO:1990405]	0
Layn	current symbol	MGI:2685357	Layn	layilin	protein coding gene	ENSMUSG00000060594	244864	Q8C351	Receptor for hyaluronate. {ECO:0000250}.	0	0	carbohydrate binding [GO:0030246]; hyaluronic acid binding [GO:0005540]	0
Olr1	current symbol	MGI:1261434	Olr1	oxidized low density lipoprotein (lectin-like) receptor 1	protein coding gene	ENSMUSG00000030162	108078	Q9EQ09	Receptor that mediates the recognition, internalization and degradation of oxidatively modified low density lipoprotein (oxLDL) by vascular endothelial cells. OxLDL is a marker of atherosclerosis that induces vascular endothelial cell activation and dysfunction, resulting in pro-inflammatory responses, pro-oxidative conditions and apoptosis. Its association with oxLDL induces the activation of NF…	0	cell death [GO:0008219]; immune system process [GO:0002376]; inflammatory response [GO:0006954]; leukocyte cell-cell adhesion [GO:0007159]; lipoprotein metabolic process [GO:0042157]; negative regulation of gene expression [GO:0010629]	carbohydrate binding [GO:0030246]; identical protein binding [GO:0042802]; low-density lipoprotein particle receptor activity [GO:0005041]	0
Uap1	current symbol	MGI:1334459	Uap1	UDP-N-acetylglucosamine pyrophosphorylase 1	protein coding gene	ENSMUSG00000026670	107652	Q91YN5	Converts UTP and GlcNAc-1-P into UDP-GlcNAc, and UTP and GalNAc-1-P into UDP-GalNAc. Isoform AGX1 has 2 to 3 times higher activity towards GalNAc-1-P, while isoform AGX2 has 8 times more activity towards GlcNAc-1-P (By similarity). {ECO:0000250}.	Nucleotide-sugar biosynthesis; UDP-N-acetyl-alpha-D-glucosamine biosynthesis; UDP-N-acetyl-alpha-D-glucosamine from N-acetyl-alpha-D-glucosamine 1-phosphate: step 1/1.	UDP-N-acetylglucosamine biosynthetic process [GO:0006048]; UDP-N-acetylglucosamine metabolic process [GO:0006047]	carbohydrate binding [GO:0030246]; identical protein binding [GO:0042802]; UDP-N-acetylgalactosamine diphosphorylase activity [GO:0052630]; UDP-N-acetylglucosamine diphosphorylase activity [GO:0003977]	UDPGP type 1 family
Fcer2a	current symbol	MGI:95497	Fcer2a	Fc receptor, IgE, low affinity II, alpha polypeptide	protein coding gene	ENSMUSG00000005540	14128	P20693	Low-affinity receptor for immunoglobulin E (IgE) and CR2/CD21. Has essential roles in the regulation of IgE production and in the differentiation of B-cells (it is a B-cell-specific antigen).	0	positive regulation of humoral immune response mediated by circulating immunoglobulin [GO:0002925]; positive regulation of killing of cells of other organism [GO:0051712]; positive regulation of nitric-oxide synthase activity [GO:0051000]; positive regulation of nitric-oxide synthase biosynthetic process [GO:0051770]	carbohydrate binding [GO:0030246]; IgE binding [GO:0019863]; metal ion binding [GO:0046872]	0
Lgals8	current symbol	MGI:1928481	Lgals8	lectin, galactose binding, soluble 8	protein coding gene	ENSMUSG00000057554	56048	Q9JL15	Beta-galactoside-binding lectin that acts as a sensor of membrane damage caused by infection and restricts the proliferation of infecting pathogens by targeting them for autophagy. Detects membrane rupture by binding beta-galactoside ligands located on the lumenal side of the endosome membrane; these ligands becoming exposed to the cytoplasm following rupture. Restricts infection by initiating au…	0	cellular response to virus [GO:0098586]; lymphatic endothelial cell migration [GO:1904977]; plasma cell differentiation [GO:0002317]; T cell costimulation [GO:0031295]; xenophagy [GO:0098792]	carbohydrate binding [GO:0030246]; integrin binding [GO:0005178]	0
Lgals12	current symbol	MGI:1929094	Lgals12	lectin, galactose binding, soluble 12	protein coding gene	ENSMUSG00000024972	56072	Q91VD1	Binds lactose. May participate in the apoptosis of adipocytes.	0	intrinsic apoptotic signaling pathway [GO:0097193]; lymphatic endothelial cell migration [GO:1904977]; regulation of fat cell differentiation [GO:0045598]; regulation of lipid catabolic process [GO:0050994]	carbohydrate binding [GO:0030246]; integrin binding [GO:0005178]; lactose binding [GO:0030395]	0
Colec12	current symbol	MGI:2152907	Colec12	collectin sub-family member 12	protein coding gene	ENSMUSG00000036103	140792	Q8K4Q8	Scavenger receptor that displays several functions associated with host defense. Promotes binding and phagocytosis of Gram-positive, Gram-negative bacteria and yeast. Binds also to sialyl Lewis X or a trisaccharide and asialo-orosomucoid (ASOR). Mediates the recognition, internalization and degradation of oxidatively modified low density lipoprotein (oxLDL) by vascular endothelial cells (By simil…	0	cellular response to exogenous dsRNA [GO:0071360]; defense response to bacterium [GO:0042742]; immune response [GO:0006955]; phagocytosis, recognition [GO:0006910]; positive regulation of cell adhesion molecule production [GO:0060355]; toll-like receptor 3 signaling pathway [GO:0034138]	carbohydrate binding [GO:0030246]; low-density lipoprotein particle binding [GO:0030169]; metal ion binding [GO:0046872]; pattern recognition receptor activity [GO:0038187]; scavenger receptor activity [GO:0005044]; signaling receptor activity [GO:0038023]	0
Galnt2	current symbol	MGI:894694	Galnt2	polypeptide N-acetylgalactosaminyltransferase 2	protein coding gene	ENSMUSG00000089704	108148	Q6PB93	Catalyzes the initial reaction in O-linked oligosaccharide biosynthesis, the transfer of an N-acetyl-D-galactosamine residue to a serine or threonine residue on the protein receptor. Has a broad spectrum of substrates for peptides such as EA2, Muc5AC, Muc1a, Muc1b. Probably involved in O-linked glycosylation of the immunoglobulin A1 (IgA1) hinge region (By similarity). Involved in O-linked glycos…	Protein modification; protein glycosylation.	O-glycan processing [GO:0016266]; protein maturation [GO:0051604]; protein O-linked glycosylation [GO:0006493]; protein O-linked glycosylation via serine [GO:0018242]; protein O-linked glycosylation via threonine [GO:0018243]	carbohydrate binding [GO:0030246]; manganese ion binding [GO:0030145]; polypeptide N-acetylgalactosaminyltransferase activity [GO:0004653]	Glycosyltransferase 2 family, GalNAc-T subfamily
Galnt1	current symbol	MGI:894693	Galnt1	polypeptide N-acetylgalactosaminyltransferase 1	protein coding gene	ENSMUSG00000000420	14423	O08912	Catalyzes the initial reaction in O-linked oligosaccharide biosynthesis, the transfer of an N-acetyl-D-galactosamine residue to a serine or threonine residue on the protein receptor. Has a broad spectrum of substrates for peptides such as EA2, Muc5AC, Muc1a, Muc1b and Muc7. {ECO:0000269|PubMed:9153242}.	Protein modification; protein glycosylation.	protein O-linked glycosylation [GO:0006493]; protein O-linked glycosylation via serine [GO:0018242]; protein O-linked glycosylation via threonine [GO:0018243]	carbohydrate binding [GO:0030246]; manganese ion binding [GO:0030145]; polypeptide N-acetylgalactosaminyltransferase activity [GO:0004653]	Glycosyltransferase 2 family, GalNAc-T subfamily
Galnt4	current symbol	MGI:894692	Galnt4	polypeptide N-acetylgalactosaminyltransferase 4	protein coding gene	ENSMUSG00000090035	14426	O08832	Catalyzes the initial reaction in O-linked oligosaccharide biosynthesis, the transfer of an N-acetyl-D-galactosamine residue to a serine or threonine residue on the protein receptor. Has a highest activity toward EA2 peptide substrate and a much lower activity with EPO-T, Muc2, Muc1a, Muc1b. {ECO:0000269|PubMed:9153242}.	Protein modification; protein glycosylation. {ECO:0000269|PubMed:9153242}.	protein O-linked glycosylation via serine [GO:0018242]; protein O-linked glycosylation via threonine [GO:0018243]	carbohydrate binding [GO:0030246]; manganese ion binding [GO:0030145]; polypeptide N-acetylgalactosaminyltransferase activity [GO:0004653]	Glycosyltransferase 2 family, GalNAc-T subfamily
Frem1	current symbol	MGI:2670972	Frem1	Fras1 related extracellular matrix protein 1	protein coding gene	ENSMUSG00000059049	329872	Q684R7	Extracellular matrix protein that plays a role in epidermal differentiation and is required for epidermal adhesion during embryonic development. {ECO:0000269|PubMed:15345741}.	0	cell communication [GO:0007154]; cell-matrix adhesion [GO:0007160]; craniofacial suture morphogenesis [GO:0097094]	carbohydrate binding [GO:0030246]; metal ion binding [GO:0046872]	FRAS1 family
Sftpa1	current symbol	MGI:109518	Sftpa1	surfactant associated protein A1	protein coding gene	ENSMUSG00000021789	20387	P35242	In presence of calcium ions, it binds to surfactant phospholipids and contributes to lower the surface tension at the air-liquid interface in the alveoli of the mammalian lung and is essential for normal respiration. Enhances the expression of MYO18A/SP-R210 on alveolar macrophages (PubMed:25965346). {ECO:0000269|PubMed:25965346}.	0	opsonization [GO:0008228]; positive regulation of phagocytosis [GO:0050766]; respiratory gaseous exchange by respiratory system [GO:0007585]	carbohydrate binding [GO:0030246]; metal ion binding [GO:0046872]	SFTPA family
Galnt11	current symbol	MGI:2444392	Galnt11	polypeptide N-acetylgalactosaminyltransferase 11	protein coding gene	ENSMUSG00000038072	231050	Q921L8	Polypeptide N-acetylgalactosaminyltransferase that catalyzes the initiation of protein O-linked glycosylation and is involved in left/right asymmetry by mediating O-glycosylation of NOTCH1. O-glycosylation of NOTCH1 promotes activation of NOTCH1, modulating the balance between motile and immotile (sensory) cilia at the left-right organiser (LRO). Polypeptide N-acetylgalactosaminyltransferases cat…	Protein modification; protein glycosylation.	cilium assembly [GO:0060271]; determination of left/right symmetry [GO:0007368]; Notch receptor processing [GO:0007220]; Notch signaling involved in heart development [GO:0061314]; protein O-linked glycosylation via threonine [GO:0018243]; regulation of Notch signaling pathway [GO:0008593]	carbohydrate binding [GO:0030246]; metal ion binding [GO:0046872]; Notch binding [GO:0005112]; polypeptide N-acetylgalactosaminyltransferase activity [GO:0004653]	Glycosyltransferase 2 family, GalNAc-T subfamily
Galnt10	current symbol	MGI:1890480	Galnt10	polypeptide N-acetylgalactosaminyltransferase 10	protein coding gene	ENSMUSG00000020520	171212	Q6P9S7	Catalyzes the initial reaction in O-linked oligosaccharide biosynthesis, the transfer of an N-acetyl-D-galactosamine residue to a serine or threonine residue on the protein receptor. Has activity toward Muc5Ac and EA2 peptide substrates (By similarity). {ECO:0000250}.	Protein modification; protein glycosylation.	O-glycan processing [GO:0016266]; protein O-linked glycosylation [GO:0006493]	carbohydrate binding [GO:0030246]; metal ion binding [GO:0046872]; polypeptide N-acetylgalactosaminyltransferase activity [GO:0004653]	Glycosyltransferase 2 family, GalNAc-T subfamily
Galnt14	current symbol	MGI:1918935	Galnt14	polypeptide N-acetylgalactosaminyltransferase 14	protein coding gene	ENSMUSG00000024064	71685	Q8BVG5	Catalyzes the initial reaction in O-linked oligosaccharide biosynthesis, the transfer of an N-acetyl-D-galactosamine residue to a serine or threonine residue on the protein receptor. Displays activity toward mucin-derived peptide substrates such as Muc2, Muc5AC, Muc7, and Muc13 (-58). May be involved in O-glycosylation in kidney (By similarity). {ECO:0000250}.	Protein modification; protein glycosylation.	protein glycosylation [GO:0006486]	carbohydrate binding [GO:0030246]; metal ion binding [GO:0046872]; polypeptide N-acetylgalactosaminyltransferase activity [GO:0004653]	Glycosyltransferase 2 family, GalNAc-T subfamily
Galnt6	current symbol	MGI:1891640	Galnt6	polypeptide N-acetylgalactosaminyltransferase 6	protein coding gene	ENSMUSG00000037280	207839	Q8C7U7	Catalyzes the initial reaction in O-linked oligosaccharide biosynthesis, the transfer of an N-acetyl-D-galactosamine residue to a serine or threonine residue on the protein receptor. May participate in synthesis of oncofetal fibronectin. Has activity toward Muc1a, Muc2, EA2 and fibronectin peptides (By similarity). {ECO:0000250}.	Protein modification; protein glycosylation.	protein glycosylation [GO:0006486]	carbohydrate binding [GO:0030246]; metal ion binding [GO:0046872]; polypeptide N-acetylgalactosaminyltransferase activity [GO:0004653]	Glycosyltransferase 2 family, GalNAc-T subfamily
Galnt5	current symbol	MGI:2179403	Galnt5	polypeptide N-acetylgalactosaminyltransferase 5	protein coding gene	ENSMUSG00000026828	241391	Q8C102	Catalyzes the initial reaction in O-linked oligosaccharide biosynthesis, the transfer of an N-acetyl-D-galactosamine residue to a serine or threonine residue on the protein receptor. Has activity toward EA2 peptide substrate, but has a weak activity toward Muc2 or Muc1b substrates (By similarity). {ECO:0000250}.	Protein modification; protein glycosylation.	protein glycosylation [GO:0006486]	carbohydrate binding [GO:0030246]; metal ion binding [GO:0046872]; polypeptide N-acetylgalactosaminyltransferase activity [GO:0004653]	Glycosyltransferase 2 family, GalNAc-T subfamily
Galnt12	current symbol	MGI:2444664	Galnt12	polypeptide N-acetylgalactosaminyltransferase 12	protein coding gene	ENSMUSG00000039774	230145	Q8BGT9	Catalyzes the initial reaction in O-linked oligosaccharide biosynthesis, the transfer of an N-acetyl-D-galactosamine residue to a serine or threonine residue on the protein receptor. Has activity toward non-glycosylated peptides such as Muc5AC, Muc1a and EA2, and no detectable activity with Muc2 and Muc7. Displays enzymatic activity toward the Gal-NAc-Muc5AC glycopeptide, but no detectable activi…	Protein modification; protein glycosylation.	protein glycosylation [GO:0006486]	carbohydrate binding [GO:0030246]; metal ion binding [GO:0046872]; polypeptide N-acetylgalactosaminyltransferase activity [GO:0004653]	Glycosyltransferase 2 family, GalNAc-T subfamily
Galnt15	current symbol	MGI:1926004	Galnt15	polypeptide N-acetylgalactosaminyltransferase 15	protein coding gene	ENSMUSG00000021903	78754	Q9D2N8	Catalyzes the initial reaction in O-linked oligosaccharide biosynthesis, the transfer of an N-acetyl-D-galactosamine residue to a serine or threonine residue on the protein receptor. Although it displays a much weaker activity toward all substrates tested compared to GALNT2, it is able to transfer up to seven GalNAc residues to the Muc5AC peptide, suggesting that it can fill vicinal Thr/Ser resid…	Protein modification; protein glycosylation.	protein glycosylation [GO:0006486]	carbohydrate binding [GO:0030246]; metal ion binding [GO:0046872]; polypeptide N-acetylgalactosaminyltransferase activity [GO:0004653]	Glycosyltransferase 2 family, GalNAc-T subfamily
Galnt18	current symbol	MGI:2446239	Galnt18	polypeptide N-acetylgalactosaminyltransferase 18	protein coding gene	ENSMUSG00000038296	233733	Q8K1B9	Catalyzes the initial reaction in O-linked oligosaccharide biosynthesis, the transfer of an N-acetyl-D-galactosamine residue to a serine or threonine residue on the protein receptor. {ECO:0000250}.	Protein modification; protein glycosylation.	protein O-linked glycosylation [GO:0006493]	carbohydrate binding [GO:0030246]; metal ion binding [GO:0046872]; polypeptide N-acetylgalactosaminyltransferase activity [GO:0004653]	Glycosyltransferase 2 family, GalNAc-T subfamily
Galnt7	current symbol	MGI:1349449	Galnt7	polypeptide N-acetylgalactosaminyltransferase 7	protein coding gene	ENSMUSG00000031608	108150	Q80VA0	Glycopeptide transferase involved in O-linked oligosaccharide biosynthesis, which catalyzes the transfer of an N-acetyl-D-galactosamine residue to an already glycosylated peptide. In contrast to other proteins of the family, it does not act as a peptide transferase that transfers GalNAc onto serine or threonine residue on the protein receptor, but instead requires the prior addition of a GalNAc o…	Protein modification; protein glycosylation. {ECO:0000250|UniProtKB:Q86SF2}.	protein O-linked glycosylation [GO:0006493]	carbohydrate binding [GO:0030246]; metal ion binding [GO:0046872]; polypeptide N-acetylgalactosaminyltransferase activity [GO:0004653]	Glycosyltransferase 2 family, GalNAc-T subfamily
Galnt13	current symbol	MGI:2139447	Galnt13	polypeptide N-acetylgalactosaminyltransferase 13	protein coding gene	ENSMUSG00000060988	271786	Q8CF93	Catalyzes the initial reaction in O-linked oligosaccharide biosynthesis, the transfer of an N-acetyl-D-galactosamine residue to a serine or threonine residue on the protein receptor. Has a much stronger activity than GALNT1 to transfer GalNAc to mucin peptides, such as Muc5Ac and Muc7. Able to glycosylate SDC3. Probably responsible for the synthesis of Tn antigen in neuronal cells. {ECO:0000269|P…	Protein modification; protein glycosylation.	protein O-linked glycosylation [GO:0006493]; protein O-linked glycosylation via serine [GO:0018242]; protein O-linked glycosylation via threonine [GO:0018243]	carbohydrate binding [GO:0030246]; metal ion binding [GO:0046872]; polypeptide N-acetylgalactosaminyltransferase activity [GO:0004653]	Glycosyltransferase 2 family, GalNAc-T subfamily
Galnt16	current symbol	MGI:1917754	Galnt16	polypeptide N-acetylgalactosaminyltransferase 16	protein coding gene	ENSMUSG00000021130	108760	Q9JJ61	Catalyzes the initial reaction in O-linked oligosaccharide biosynthesis, the transfer of an N-acetyl-D-galactosamine residue to a serine or threonine residue on the protein receptor. {ECO:0000250}.	Protein modification; protein glycosylation.	protein O-linked glycosylation via serine [GO:0018242]; protein O-linked glycosylation via threonine [GO:0018243]	carbohydrate binding [GO:0030246]; metal ion binding [GO:0046872]; polypeptide N-acetylgalactosaminyltransferase activity [GO:0004653]	Glycosyltransferase 2 family, GalNAc-T subfamily
Clec2f	current symbol	MGI:3522133	Clec2f	C-type lectin domain family 2, member f	protein coding gene	ENSMUSG00000089728	435921	Q8VI21	Lectin-type cell surface receptor. {ECO:0000250}.	0	0	carbohydrate binding [GO:0030246]; natural killer cell lectin-like receptor binding [GO:0046703]; protein homodimerization activity [GO:0042803]	0
Zg16	current symbol	MGI:1916286	Zg16	zymogen granule protein 16	protein coding gene	ENSMUSG00000049350	69036	Q8K0C5	May play a role in protein trafficking. May act as a linker molecule between the submembranous matrix on the luminal side of zymogen granule membrane (ZGM) and aggregated secretory proteins during granule formation in the TGN (By similarity). {ECO:0000250}.	0	defense response to Gram-positive bacterium [GO:0050830]; protein transport [GO:0015031]; suppression of symbiont entry into host by host [GO:0052373]	carbohydrate binding [GO:0030246]; peptidoglycan binding [GO:0042834]	Jacalin lectin family
Siglecg	current symbol	MGI:2443630	Siglecg	sialic acid binding Ig-like lectin G	protein coding gene	ENSMUSG00000030468	243958	Q80ZE3	Putative adhesion molecule that mediates sialic-acid dependent binding to cells. Preferentially binds to alpha-2,3- or alpha-2,6-linked sialic acid (PubMed:20038598). The sialic acid recognition site may be masked by cis interactions with sialic acids on the same cell surface. In the immune response, seems to act as an inhibitory receptor upon ligand induced tyrosine phosphorylation by recruiting…	0	adaptive immune response [GO:0002250]; cell adhesion [GO:0007155]; hematopoietic progenitor cell differentiation [GO:0002244]; innate immune response [GO:0045087]; negative regulation of calcium-mediated signaling [GO:0050849]; negative regulation of immunoglobulin production [GO:0002638]; negative regulation of inflammatory response to wounding [GO:0106015]; regulation of B cell proliferation [G…	carbohydrate binding [GO:0030246]; phosphatase binding [GO:0019902]; SH2 domain binding [GO:0042169]; sialic acid binding [GO:0033691]	Immunoglobulin superfamily, SIGLEC (sialic acid binding Ig-like lectin) family
Pla2r1	current symbol	MGI:102468	Pla2r1	phospholipase A2 receptor 1	protein coding gene	ENSMUSG00000054580	18779	Q62028	Receptor for secretory phospholipase A2 (sPLA2). Acts as a receptor for phospholipases sPLA2-IB/PLA2G1B, sPLA2-X/PLA2G10 and, with lower affinity, sPLA2-IIA/PLA2G2A. Also able to bind to snake PA2-like toxins. Although its precise function remains unclear, binding of sPLA2 to its receptor participates in both positive and negative regulation of sPLA2 functions as well as clearance of sPLA2. Bindi…	0	negative regulation of arachidonic acid secretion [GO:1900139]; negative regulation of phospholipase A2 activity [GO:1900138]; oxidative stress-induced premature senescence [GO:0090403]; positive regulation of arachidonic acid secretion [GO:0090238]; positive regulation of cytokine production [GO:0001819]; positive regulation of DNA damage response, signal transduction by p53 class mediator [GO:0…	carbohydrate binding [GO:0030246]; phospholipase binding [GO:0043274]; signaling receptor activity [GO:0038023]	0
Os9	current symbol	MGI:1924301	Os9	amplified in osteosarcoma	protein coding gene	ENSMUSG00000040462	216440	Q8K2C7	Lectin which functions in endoplasmic reticulum (ER) quality control and ER-associated degradation (ERAD). May bind terminally misfolded non-glycosylated proteins as well as improperly folded glycoproteins, retain them in the ER, and possibly transfer them to the ubiquitination machinery and promote their degradation. Possible targets include TRPV4 (By similarity). {ECO:0000250}.	0	negative regulation of retrograde protein transport, ER to cytosol [GO:1904153]; protein retention in ER lumen [GO:0006621]; protein targeting [GO:0006605]; protein ubiquitination [GO:0016567]; response to endoplasmic reticulum stress [GO:0034976]; retrograde protein transport, ER to cytosol [GO:0030970]; ubiquitin-dependent ERAD pathway [GO:0030433]; ubiquitin-dependent protein catabolic process…	carbohydrate binding [GO:0030246]; protease binding [GO:0002020]	OS-9 family
Clec12b	current symbol	MGI:1918433	Clec12b	C-type lectin domain family 12, member B	protein coding gene	ENSMUSG00000030158	71183	Q149M0	Cell surface receptor that protects target cells against natural killer cell-mediated lysis. Modulates signaling cascades and mediates tyrosine phosphorylation of target MAP kinases (By similarity). {ECO:0000250}.	0	natural killer cell inhibitory signaling pathway [GO:0002769]; negative regulation of natural killer cell mediated cytotoxicity [GO:0045953]; negative regulation of signaling receptor activity [GO:2000272]	carbohydrate binding [GO:0030246]; protein phosphatase binding [GO:0019903]; signaling receptor inhibitor activity [GO:0030547]	0
Clec12a	current symbol	MGI:3040968	Clec12a	C-type lectin domain family 12, member a	protein coding gene	ENSMUSG00000053063	232413	Q504P2	Cell surface receptor that modulates signaling cascades and mediates tyrosine phosphorylation of target MAP kinases. {ECO:0000250}.	0	regulation of immune response [GO:0050776]	carbohydrate binding [GO:0030246]; protein phosphatase binding [GO:0019903]; signaling receptor regulator activity [GO:0030545]	0
Atrn	current symbol	MGI:1341628	Atrn	attractin	protein coding gene	ENSMUSG00000027312	11990	Q9WU60	Involved in the initial immune cell clustering during inflammatory response and may regulate chemotactic activity of chemokines (By similarity). May play a role in melanocortin signaling pathways that regulate energy homeostasis and hair color. Low-affinity receptor for agouti. Has a critical role in normal myelination in the central nervous system (By similarity). {ECO:0000250, ECO:0000269|PubMe…	0	animal organ morphogenesis [GO:0009887]; cell migration [GO:0016477]; cerebellum development [GO:0021549]; inflammatory response [GO:0006954]; myelination [GO:0042552]; pigmentation [GO:0043473]; regulation of multicellular organism growth [GO:0040014]; response to oxidative stress [GO:0006979]; substrate adhesion-dependent cell spreading [GO:0034446]; tissue development [GO:0009888]	carbohydrate binding [GO:0030246]; signaling receptor activity [GO:0038023]	0
Ly75	current symbol	MGI:106662	Ly75	lymphocyte antigen 75	protein coding gene	ENSMUSG00000026980	17076	Q60767	Acts as an endocytic receptor to direct captured antigens from the extracellular space to a specialized antigen-processing compartment. Causes reduced proliferation of B lymphocytes (By similarity). {ECO:0000250}.	0	endocytosis [GO:0006897]	carbohydrate binding [GO:0030246]; signaling receptor activity [GO:0038023]	0
Cd302	current symbol	MGI:1913455	Cd302	CD302 antigen	protein coding gene	ENSMUSG00000060703	66205	Q9DCG2	Potential multifunctional C-type lectin receptor that may play roles in endocytosis and phagocytosis as well as in cell adhesion and migration. {ECO:0000250}.	0	phagocytosis [GO:0006909]	carbohydrate binding [GO:0030246]; signaling receptor activity [GO:0038023]	0
Cd72	current symbol	MGI:88345	Cd72	CD72 antigen	protein coding gene	ENSMUSG00000028459	12517	P21855	Plays a role in B-cell proliferation and differentiation.	0	0	carbohydrate binding [GO:0030246]; transmembrane signaling receptor activity [GO:0004888]	0
Clec1b	current symbol	MGI:1913287	Clec1b	C-type lectin domain family 1, member b	protein coding gene	ENSMUSG00000030159	56760	Q9JL99	C-type lectin-like receptor that functions as a platelet receptor for the lymphatic endothelial marker, PDPN. After ligand activation, signals via sequential activation of SRC and SYK tyrosine kinases leading to activation of PLCG2. {ECO:0000250|UniProtKB:Q9P126}.	0	cell surface receptor signaling pathway [GO:0007166]; platelet formation [GO:0030220]; signal transduction [GO:0007165]	carbohydrate binding [GO:0030246]; transmembrane signaling receptor activity [GO:0004888]	0
Siglec1	current symbol	MGI:99668	Siglec1	sialic acid binding Ig-like lectin 1, sialoadhesin	protein coding gene	ENSMUSG00000027322	20612	Q62230	Acts as an endocytic receptor mediating clathrin dependent endocytosis. Macrophage-restricted adhesion molecule that mediates sialic-acid dependent binding to lymphocytes, including granulocytes, monocytes, natural killer cells, B-cells and CD8 T-cells (By similarity). Preferentially binds to alpha-2,3-linked sialic acid. Binds to SPN/CD43 on T-cells. May play a role in hematopoiesis. May act as …	0	cell adhesion [GO:0007155]; clathrin-dependent endocytosis of virus by host cell [GO:0075512]; positive regulation of extrinsic apoptotic signaling pathway [GO:2001238]; positive regulation of T cell apoptotic process [GO:0070234]	carbohydrate binding [GO:0030246]; virion binding [GO:0046790]	Immunoglobulin superfamily, SIGLEC (sialic acid binding Ig-like lectin) family
Clec5a	current symbol	MGI:1345151	Clec5a	C-type lectin domain family 5, member a	protein coding gene	ENSMUSG00000029915	23845	Q9R007	Functions as a positive regulator of osteoclastogenesis (PubMed:19251634). Cell surface receptor that signals via TYROBP (PubMed:10449773). Regulates inflammatory responses (PubMed:20212065). {ECO:0000269|PubMed:10449773, ECO:0000269|PubMed:19251634, ECO:0000269|PubMed:20212065}.	0	innate immune response [GO:0045087]; myeloid cell differentiation [GO:0030099]; negative regulation of apoptotic process [GO:0043066]; negative regulation of myeloid cell apoptotic process [GO:0033033]; osteoblast development [GO:0002076]; positive regulation of cytokine production [GO:0001819]	carbohydrate binding [GO:0030246]; virus receptor activity [GO:0001618]	0
Clec4g	current symbol	MGI:1923113	Clec4g	C-type lectin domain family 4, member g	protein coding gene	ENSMUSG00000074491	75863	Q8BNX1	Binds mannose, N-acetylglucosamine (GlcNAc) and fucose, but not galactose, in a Ca(2+)-dependent manner. {ECO:0000250|UniProtKB:Q6UXB4}.	0	negative regulation of T cell mediated immunity [GO:0002710]; negative regulation of T cell proliferation [GO:0042130]; positive regulation of viral life cycle [GO:1903902]; viral entry into host cell [GO:0046718]	carbohydrate derivative binding [GO:0097367]; fructose binding [GO:0070061]; mannose binding [GO:0005537]; polysaccharide binding [GO:0030247]; virus coreceptor activity [GO:0120274]; virus receptor activity [GO:0001618]	0
Gfpt2	current symbol	MGI:1338883	Gfpt2	glutamine fructose-6-phosphate transaminase 2	protein coding gene	ENSMUSG00000020363	14584	Q9Z2Z9	Controls the flux of glucose into the hexosamine pathway. Most likely involved in regulating the availability of precursors for N- and O-linked glycosylation of proteins.	Nucleotide-sugar biosynthesis; UDP-N-acetyl-alpha-D-glucosamine biosynthesis; alpha-D-glucosamine 6-phosphate from D-fructose 6-phosphate: step 1/1. {ECO:0000250|UniProtKB:P82808}.	cellular response to leukemia inhibitory factor [GO:1990830]; fructose 6-phosphate metabolic process [GO:0006002]; glutamine metabolic process [GO:0006541]; protein N-linked glycosylation [GO:0006487]; UDP-N-acetylglucosamine biosynthetic process [GO:0006048]; UDP-N-acetylglucosamine metabolic process [GO:0006047]	carbohydrate derivative binding [GO:0097367]; glutamine-fructose-6-phosphate transaminase (isomerizing) activity [GO:0004360]	0
Dcxr	current symbol	MGI:1915130	Dcxr	dicarbonyl L-xylulose reductase	protein coding gene	ENSMUSG00000039450	67880	Q91X52	Catalyzes the NADPH-dependent reduction of several pentoses, tetroses, trioses, alpha-dicarbonyl compounds and L-xylulose. Participates in the uronate cycle of glucose metabolism. May play a role in the water absorption and cellular osmoregulation in the proximal renal tubules by producing xylitol, an osmolyte, thereby preventing osmolytic stress from occurring in the renal tubules.	0	D-xylose metabolic process [GO:0042732]; glucose metabolic process [GO:0006006]; NADP metabolic process [GO:0006739]; positive regulation of reactive oxygen species metabolic process [GO:2000379]; xylulose metabolic process [GO:0005997]	carbonyl reductase (NADPH) activity [GO:0004090]; identical protein binding [GO:0042802]; L-xylulose reductase (NAD+) activity [GO:0044105]; L-xylulose reductase (NADP+) activity [GO:0050038]; oxidoreductase activity, acting on CH-OH group of donors [GO:0016614]; oxidoreductase activity, acting on NAD(P)H, quinone or similar compound as acceptor [GO:0016655]	Short-chain dehydrogenases/reductases (SDR) family
Mrc1	current symbol	MGI:97142	Mrc1	mannose receptor, C type 1	protein coding gene	ENSMUSG00000026712	17533	Q61830	Mediates the endocytosis of glycoproteins by macrophages. Binds both sulfated and non-sulfated polysaccharide chains. Acts as phagocytic receptor for bacteria, fungi and other pathogens. {ECO:0000269|PubMed:1421407}.	0	cellular response to interferon-gamma [GO:0071346]; cellular response to interleukin-4 [GO:0071353]; cellular response to lipopolysaccharide [GO:0071222]; receptor-mediated endocytosis [GO:0006898]	cargo receptor activity [GO:0038024]; mannose binding [GO:0005537]; signaling receptor activity [GO:0038023]; transmembrane signaling receptor activity [GO:0004888]	0
Ogt	current symbol	MGI:1339639	Ogt	O-linked N-acetylglucosamine (GlcNAc) transferase (UDP-N-acetylglucosamine:polypeptide-N-acetylglucosaminyl transferase)	protein coding gene	ENSMUSG00000034160	108155	Q8CGY8	Catalyzes the transfer of a single N-acetylglucosamine from UDP-GlcNAc to a serine or threonine residue in cytoplasmic and nuclear proteins resulting in their modification with a beta-linked N-acetylglucosamine (O-GlcNAc) (PubMed:29465778). Glycosylates a large and diverse number of proteins including histone H2B, AKT1, EZH2, PFKL, KMT2E/MLL5, MAPT/TAU and HCFC1. Can regulate their cellular proce…	Protein modification; protein glycosylation. {ECO:0000269|PubMed:29465778}.	apoptotic process [GO:0006915]; cellular response to glucose stimulus [GO:0071333]; cellular response to lipopolysaccharide [GO:0071222]; circadian regulation of gene expression [GO:0032922]; glucosamine metabolic process [GO:0006041]; histone H3-K4 trimethylation [GO:0080182]; histone H4-K16 acetylation [GO:0043984]; histone H4-K5 acetylation [GO:0043981]; histone H4-K8 acetylation [GO:0043982];…	catalytic activity [GO:0003824]; identical protein binding [GO:0042802]; monosaccharide binding [GO:0048029]; N-acetyltransferase activity [GO:0008080]; peptide binding [GO:0042277]; phosphatidylinositol-3,4,5-trisphosphate binding [GO:0005547]; protein-containing complex binding [GO:0044877]; protein domain specific binding [GO:0019904]; protein N-acetylglucosaminyltransferase activity [GO:00162…	Glycosyltransferase 41 family, O-GlcNAc transferase subfamily
Ugcg	current symbol	MGI:1332243	Ugcg	UDP-glucose ceramide glucosyltransferase	protein coding gene	ENSMUSG00000028381	22234	O88693	Catalyzes at the cytosolic surface of the Golgi, the initial step of the glucosylceramide-based glycosphingolipid/GSL synthetic pathway, the transfer of glucose from UDP-glucose to ceramide to produce glucosylceramide/GlcCer (PubMed:10430909, PubMed:16109770, PubMed:28373486). Glucosylceramide is the core component of glycosphingolipids/GSLs, amphipathic molecules consisting of a ceramide lipid m…	Lipid metabolism; sphingolipid metabolism. {ECO:0000269|PubMed:10430909, ECO:0000269|PubMed:16109770, ECO:0000269|PubMed:28373486}.	cell differentiation [GO:0030154]; cornified envelope assembly [GO:1903575]; establishment of skin barrier [GO:0061436]; glucosylceramide biosynthetic process [GO:0006679]; intestinal lipid absorption [GO:0098856]; keratinocyte differentiation [GO:0030216]; leptin-mediated signaling pathway [GO:0033210]; neuron development [GO:0048666]; protein lipidation [GO:0006497]; regulation of signal transd…	ceramide glucosyltransferase activity [GO:0008120]; dihydroceramide glucosyltransferase activity [GO:0102769]	Glycosyltransferase 2 family
Colec10	current symbol	MGI:3606482	Colec10	collectin sub-family member 10	protein coding gene	ENSMUSG00000038591	239447	Q8CF98	Lectin that binds to various sugars: galactose > mannose = fucose > N-acetylglucosamine > N-acetylgalactosamine. Acts as a chemoattractant, probably involved in the regulation of cell migration. {ECO:0000250|UniProtKB:Q9Y6Z7}.	0	cranial skeletal system development [GO:1904888]; defense response [GO:0006952]; embryo development ending in birth or egg hatching [GO:0009792]; heterophilic cell-cell adhesion via plasma membrane cell adhesion molecules [GO:0007157]	chemoattractant activity [GO:0042056]; mannose binding [GO:0005537]	COLEC10/COLEC11 family
Chil1	current symbol	MGI:1340899	Chil1	chitinase-like 1	protein coding gene	ENSMUSG00000064246	12654	Q61362	Carbohydrate-binding lectin with a preference for chitin. Has no chitinase activity. May play a role in tissue remodeling and in the capacity of cells to respond to and cope with changes in their environment. Plays a role in T-helper cell type 2 (Th2) inflammatory response and IL-13-induced inflammation, regulating allergen sensitization, inflammatory cell apoptosis, dendritic cell accumulation a…	0	activation of NF-kappaB-inducing kinase activity [GO:0007250]; apoptotic process [GO:0006915]; carbohydrate metabolic process [GO:0005975]; cellular response to tumor necrosis factor [GO:0071356]; chitin catabolic process [GO:0006032]; inflammatory response [GO:0006954]; lung development [GO:0030324]; positive regulation of angiogenesis [GO:0045766]; positive regulation of ERK1 and ERK2 cascade […	chitin binding [GO:0008061]	Glycosyl hydrolase 18 family
Chid1	current symbol	MGI:1915288	Chid1	chitinase domain containing 1	protein coding gene	ENSMUSG00000025512	68038	Q922Q9	Saccharide- and LPS-binding protein with possible roles in pathogen sensing and endotoxin neutralization. Ligand-binding specificity relates to the length of the oligosaccharides, with preference for chitotetraose (in vitro) (By similarity). {ECO:0000250}.	0	carbohydrate metabolic process [GO:0005975]; innate immune response [GO:0045087]; negative regulation of cytokine production involved in inflammatory response [GO:1900016]	chitin binding [GO:0008061]; oligosaccharide binding [GO:0070492]	Glycosyl hydrolase 18 family
Alg1	current symbol	MGI:2384774	Alg1	asparagine-linked glycosylation 1 (beta-1,4-mannosyltransferase)	protein coding gene	ENSMUSG00000039427	208211	Q921Q3	Participates in the formation of the lipid-linked precursor oligosaccharide for N-glycosylation. Involved in assembling the dolichol-pyrophosphate-GlcNAc(2)-Man(5) intermediate on the cytoplasmic surface of the ER (By similarity). {ECO:0000250}.	Protein modification; protein glycosylation.	protein glycosylation [GO:0006486]	chitobiosyldiphosphodolichol beta-mannosyltransferase activity [GO:0004578]; mannosyltransferase activity [GO:0000030]	Glycosyltransferase group 1 family, Glycosyltransferase 33 subfamily
Chst11	current symbol	MGI:1927166	Chst11	carbohydrate sulfotransferase 11	protein coding gene	ENSMUSG00000034612	58250	Q9JME2	Catalyzes the transfer of sulfate to position 4 of the N-acetylgalactosamine (GalNAc) residue of chondroitin. Chondroitin sulfate constitutes the predominant proteoglycan present in cartilage and is distributed on the surfaces of many cells and extracellular matrices. Can also sulfate Gal residues in desulfated dermatan sulfate. Preferentially sulfates in GlcA->GalNAc unit than in IdoA->GalNAc un…	0	carbohydrate biosynthetic process [GO:0016051]; cartilage development [GO:0051216]; chondrocyte development [GO:0002063]; chondroitin sulfate biosynthetic process [GO:0030206]; chondroitin sulfate metabolic process [GO:0030204]; developmental growth [GO:0048589]; embryonic digit morphogenesis [GO:0042733]; embryonic limb morphogenesis [GO:0030326]; embryonic skeletal system morphogenesis [GO:0048…	chondroitin 4-sulfotransferase activity [GO:0047756]; N-acetylgalactosamine 4-O-sulfotransferase activity [GO:0001537]; N-acetylgalactosamine 4-sulfate 6-O-sulfotransferase activity [GO:0050659]; sulfotransferase activity [GO:0008146]	Sulfotransferase 2 family
Chst13	current symbol	MGI:1919047	Chst13	carbohydrate sulfotransferase 13	protein coding gene	ENSMUSG00000056643	71797	D3Z6E3	0	0	carbohydrate biosynthetic process [GO:0016051]; chondroitin sulfate biosynthetic process [GO:0030206]; proteoglycan biosynthetic process [GO:0030166]	chondroitin 4-sulfotransferase activity [GO:0047756]; N-acetylgalactosamine 4-O-sulfotransferase activity [GO:0001537]; sulfotransferase activity [GO:0008146]	Sulfotransferase 2 family
Chst12	current symbol	MGI:1929064	Chst12	carbohydrate sulfotransferase 12	protein coding gene	ENSMUSG00000036599	59031	Q99LL3	Catalyzes the transfer of sulfate to position 4 of the N-acetylgalactosamine (GalNAc) residue of chondroitin and desulfated dermatan sulfate. Chondroitin sulfate constitutes the predominant proteoglycan present in cartilage and is distributed on the surfaces of many cells and extracellular matrices. Activity toward partially desulfated dermatan sulfate is however lower. Does not form 4, 6-di-O-su…	0	carbohydrate biosynthetic process [GO:0016051]; chondroitin sulfate biosynthetic process [GO:0030206]; dermatan sulfate biosynthetic process [GO:0030208]; proteoglycan biosynthetic process [GO:0030166]	chondroitin 4-sulfotransferase activity [GO:0047756]; sulfotransferase activity [GO:0008146]	Sulfotransferase 2 family
Chst7	current symbol	MGI:1891767	Chst7	carbohydrate (N-acetylglucosamino) sulfotransferase 7	protein coding gene	ENSMUSG00000037347	60322	Q9EP78	Sulfotransferase that utilizes 3'-phospho-5'-adenylyl sulfate (PAPS) as sulfonate donor to catalyze the transfer of sulfate to position 6 of non-reducing N-acetylglucosamine (GlcNAc) residues. Preferentially acts on mannose-linked GlcNAc. Also able to catalyze the transfer of sulfate to position 6 of the N-acetylgalactosamine (GalNAc) residue of chondroitin. Also acts on core 2 mucin-type oligosa…	0	carbohydrate metabolic process [GO:0005975]; chondroitin sulfate biosynthetic process [GO:0030206]; N-acetylglucosamine metabolic process [GO:0006044]; sulfur compound metabolic process [GO:0006790]	chondroitin 6-sulfotransferase activity [GO:0008459]; N-acetylglucosamine 6-O-sulfotransferase activity [GO:0001517]	Sulfotransferase 1 family, Gal/GlcNAc/GalNAc subfamily
Chst3	current symbol	MGI:1858224	Chst3	carbohydrate sulfotransferase 3	protein coding gene	ENSMUSG00000057337	53374	O88199	Sulfotransferase that utilizes 3'-phospho-5'-adenylyl sulfate (PAPS) as sulfonate donor to catalyze the transfer of sulfate to position 6 of the N-acetylgalactosamine (GalNAc) residue of chondroitin (PubMed:9597547, PubMed:11696535). Chondroitin sulfate constitutes the predominant proteoglycan present in cartilage and is distributed on the surfaces of many cells and extracellular matrices (PubMed…	0	carbohydrate metabolic process [GO:0005975]; chondroitin sulfate biosynthetic process [GO:0030206]; N-acetylglucosamine metabolic process [GO:0006044]; positive regulation of cellular component movement [GO:0051272]; sulfur compound metabolic process [GO:0006790]; T cell homeostasis [GO:0043029]	chondroitin 6-sulfotransferase activity [GO:0008459]; N-acetylglucosamine 6-O-sulfotransferase activity [GO:0001517]; proteoglycan sulfotransferase activity [GO:0050698]	Sulfotransferase 1 family, Gal/GlcNAc/GalNAc subfamily
Dse	current symbol	MGI:2443455	Dse	dermatan sulfate epimerase	protein coding gene	ENSMUSG00000039497	212898	Q8BLI4	Converts D-glucuronic acid to L-iduronic acid (IdoUA) residues. Plays an important role in the biosynthesis of the glycosaminoglycan/mucopolysaccharide dermatan sulfate. {ECO:0000250|UniProtKB:Q9UL01}.	Glycan metabolism; chondroitin sulfate biosynthesis. {ECO:0000250|UniProtKB:Q9UL01}.; Glycan metabolism; heparan sulfate biosynthesis. {ECO:0000250|UniProtKB:Q9UL01}.	chondroitin sulfate biosynthetic process [GO:0030206]; chondroitin sulfate metabolic process [GO:0030204]; dermatan sulfate biosynthetic process [GO:0030208]; dermatan sulfate metabolic process [GO:0030205]; heparan sulfate proteoglycan biosynthetic process [GO:0015012]	chondroitin-glucuronate 5-epimerase activity [GO:0047757]; metal ion binding [GO:0046872]	Dermatan-sulfate isomerase family
Dsel	current symbol	MGI:2442948	Dsel	dermatan sulfate epimerase-like	protein coding gene	ENSMUSG00000038702	319901	Q0VBN2	0	0	chondroitin sulfate metabolic process [GO:0030204]; dermatan sulfate metabolic process [GO:0030205]	chondroitin-glucuronate 5-epimerase activity [GO:0047757]; sulfotransferase activity [GO:0008146]	Dermatan-sulfate isomerase family
Lum	current symbol	MGI:109347	Lum	lumican	protein coding gene	ENSMUSG00000036446	17022	P51885	0	0	cartilage development [GO:0051216]; collagen fibril organization [GO:0030199]; positive regulation of transcription by RNA polymerase II [GO:0045944]; positive regulation of transforming growth factor beta1 production [GO:0032914]; response to growth factor [GO:0070848]; response to organic cyclic compound [GO:0014070]; visual perception [GO:0007601]	collagen binding [GO:0005518]	Small leucine-rich proteoglycan (SLRP) family, SLRP class II subfamily
Podn	current symbol	MGI:2674939	Podn	podocan	protein coding gene	ENSMUSG00000028600	242608	Q7TQ62	Negatively regulates cell proliferation and cell migration, especially in smooth muscle cells. {ECO:0000250}.	0	negative regulation of cell migration [GO:0030336]; negative regulation of cell population proliferation [GO:0008285]	collagen binding [GO:0005518]	Small leucine-rich proteoglycan (SLRP) family, SLRP class V subfamily
Cspg4	current symbol	MGI:2153093	Cspg4	chondroitin sulfate proteoglycan 4	protein coding gene	ENSMUSG00000032911	121021	Q8VHY0	Proteoglycan playing a role in cell proliferation and migration which stimulates endothelial cells motility during microvascular morphogenesis. May also inhibit neurite outgrowth and growth cone collapse during axon regeneration. Cell surface receptor for collagen alpha 2(VI) which may confer cells ability to migrate on that substrate. Binds through its extracellular N-terminus growth factors, ex…	0	angiogenesis [GO:0001525]; cell population proliferation [GO:0008283]; glial cell migration [GO:0008347]; inflammatory response [GO:0006954]; intracellular signal transduction [GO:0035556]; negative regulation of neuron projection development [GO:0010977]; neuron remodeling [GO:0016322]; platelet-derived growth factor receptor signaling pathway [GO:0048008]; positive regulation of MAPK cascade [G…	collagen binding [GO:0005518]; coreceptor activity [GO:0015026]; protein kinase binding [GO:0019901]	0
Dcn	current symbol	MGI:94872	Dcn	decorin	protein coding gene	ENSMUSG00000019929	13179	P28654	May affect the rate of fibrils formation.	0	aging [GO:0007568]; kidney development [GO:0001822]; negative regulation of angiogenesis [GO:0016525]; negative regulation of endothelial cell migration [GO:0010596]; negative regulation of vascular endothelial growth factor signaling pathway [GO:1900747]; peptide cross-linking via chondroitin 4-sulfate glycosaminoglycan [GO:0019800]; placenta development [GO:0001890]; positive regulation of auto…	collagen binding [GO:0005518]; extracellular matrix binding [GO:0050840]; extracellular matrix structural constituent conferring compression resistance [GO:0030021]; glycosaminoglycan binding [GO:0005539]; protein N-terminus binding [GO:0047485]	Small leucine-rich proteoglycan (SLRP) family, SLRP class I subfamily
Gpc1	current symbol	MGI:1194891	Gpc1	glypican 1	protein coding gene	ENSMUSG00000034220	14733	Q9QZF2	Cell surface proteoglycan that bears heparan sulfate. Binds, via the heparan sulfate side chains, alpha-4 (V) collagen and participates in Schwann cell myelination (By similarity). May act as a catalyst in increasing the rate of conversion of prion protein PRPN(C) to PRNP(Sc) via associating (via the heparan sulfate side chains) with both forms of PRPN, targeting them to lipid rafts and facilitat…	0	cell migration [GO:0016477]; heparan sulfate proteoglycan catabolic process [GO:0030200]; myelin assembly [GO:0032288]; negative regulation of fibroblast growth factor receptor signaling pathway [GO:0040037]; positive regulation of skeletal muscle cell differentiation [GO:2001016]; regulation of protein localization to membrane [GO:1905475]; Schwann cell differentiation [GO:0014037]	collagen V binding [GO:0070052]; copper ion binding [GO:0005507]; fibroblast growth factor binding [GO:0017134]; laminin binding [GO:0043236]	Glypican family
Pigg	current symbol	MGI:3576484	Pigg	phosphatidylinositol glycan anchor biosynthesis, class G	protein coding gene	ENSMUSG00000029263	433931	D3YTQ6	0	0	GPI anchor biosynthetic process [GO:0006506]	CP2 mannose-ethanolamine phosphotransferase activity [GO:0051267]	0
Dhdds	current symbol	MGI:1914672	Dhdds	dehydrodolichyl diphosphate synthase	protein coding gene	ENSMUSG00000012117	67422	Q99KU1	With NUS1, forms the dehydrodolichyl diphosphate synthase (DDS) complex, an essential component of the dolichol monophosphate (Dol-P) biosynthetic machinery. Both subunits contribute to enzymatic activity, i.e. condensation of multiple copies of isopentenyl pyrophosphate (IPP) to farnesyl pyrophosphate (FPP) to produce dehydrodolichyl diphosphate (Dedol-PP), a precursor of dolichol phosphate whic…	Protein modification; protein glycosylation. {ECO:0000250|UniProtKB:Q86SQ9}.; Lipid metabolism. {ECO:0000250|UniProtKB:Q86SQ9}.	dolichyl diphosphate biosynthetic process [GO:0006489]; polyprenol biosynthetic process [GO:0016094]	dehydrodolichyl diphosphate synthase activity [GO:0045547]; metal ion binding [GO:0046872]; polyprenyltransferase activity [GO:0002094]	UPP synthase family
Dolk	current symbol	MGI:2677836	Dolk	dolichol kinase	protein coding gene	ENSMUSG00000075419	227697	Q8R2Y3	Involved in the synthesis of the sugar donor Dol-P-Man which is required in the synthesis of N-linked and O-linked oligosaccharides and for that of GPI anchors. {ECO:0000250|UniProtKB:P20048}.	0	dolichyl monophosphate biosynthetic process [GO:0043048]	dolichol kinase activity [GO:0004168]	Polyprenol kinase family
Alg10b	current symbol	MGI:2146159	Alg10b	asparagine-linked glycosylation 10B (alpha-1,2-glucosyltransferase)	protein coding gene	ENSMUSG00000075470	380959	Q3UGP8	Putative alpha-1,2-glucosyltransferase, which adds the third glucose residue to the lipid-linked oligosaccharide precursor for N-linked glycosylation. Transfers glucose from dolichyl phosphate glucose (Dol-P-Glc) onto the lipid-linked oligosaccharide Glc(2)Man(9)GlcNAc(2)-PP-Dol (By similarity). When coupled to KCNH2 may reduce KCNH2 sensitivity to classic proarrhythmic drug blockade, possibly by…	0	auditory receptor cell development [GO:0060117]; dolichol-linked oligosaccharide biosynthetic process [GO:0006488]; potassium ion transmembrane transport [GO:0071805]; protein N-linked glycosylation [GO:0006487]; sensory perception of sound [GO:0007605]	dolichyl pyrophosphate Glc2Man9GlcNAc2 alpha-1,2-glucosyltransferase activity [GO:0106073]	ALG10 glucosyltransferase family
Alg6	current symbol	MGI:2444031	Alg6	asparagine-linked glycosylation 6 (alpha-1,3,-glucosyltransferase)	protein coding gene	ENSMUSG00000073792	320438	Q3TAE8	Adds the first glucose residue to the lipid-linked oligosaccharide precursor for N-linked glycosylation. Transfers glucose from dolichyl phosphate glucose (Dol-P-Glc) onto the lipid-linked oligosaccharide Man(9)GlcNAc(2)-PP-Dol (By similarity). {ECO:0000250}.	Protein modification; protein glycosylation.	dolichol-linked oligosaccharide biosynthetic process [GO:0006488]; oligosaccharide-lipid intermediate biosynthetic process [GO:0006490]; protein N-linked glycosylation [GO:0006487]	dolichyl pyrophosphate Man9GlcNAc2 alpha-1,3-glucosyltransferase activity [GO:0042281]; glucosyltransferase activity [GO:0046527]	ALG6/ALG8 glucosyltransferase family
Dolpp1	current symbol	MGI:1914093	Dolpp1	dolichyl pyrophosphate phosphatase 1	protein coding gene	ENSMUSG00000026856	57170	Q9JMF7	Required for efficient N-glycosylation. Necessary for maintaining optimal levels of dolichol-linked oligosaccharides. Hydrolyzes dolichyl pyrophosphate at a very high rate and dolichyl monophosphate at a much lower rate. Does not act on phosphatidate. {ECO:0000269|PubMed:12198133}.	Protein modification; protein glycosylation.	lipid biosynthetic process [GO:0008610]; protein N-linked glycosylation [GO:0006487]	dolichyldiphosphatase activity [GO:0047874]	Dolichyldiphosphatase family
Dpm2	current symbol	MGI:1330238	Dpm2	dolichol-phosphate (beta-D) mannosyltransferase 2	protein coding gene	ENSMUSG00000026810	13481	Q9Z324	Regulates the biosynthesis of dolichol phosphate-mannose. Regulatory subunit of the dolichol-phosphate mannose (DPM) synthase complex; essential for the ER localization and stable expression of DPM1. Part of the glycosylphosphatidylinositol-N-acetylglucosaminyltransferase (GPI-GnT) complex that catalyzes the transfer of N-acetylglucosamine from UDP-N-acetylglucosamine to phosphatidylinositol and …	Protein modification; protein glycosylation. {ECO:0000250|UniProtKB:O94777}.	dolichol metabolic process [GO:0019348]; GPI anchor biosynthetic process [GO:0006506]; protein glycosylation [GO:0006486]; regulation of protein stability [GO:0031647]	dolichyl-phosphate beta-D-mannosyltransferase activity [GO:0004582]; enzyme activator activity [GO:0008047]; enzyme regulator activity [GO:0030234]	DPM2 family
Alg5	current symbol	MGI:1913498	Alg5	asparagine-linked glycosylation 5 (dolichyl-phosphate beta-glucosyltransferase)	protein coding gene	ENSMUSG00000036632	66248	Q9DB25	0	Protein modification; protein glycosylation.	determination of left/right symmetry [GO:0007368]; protein N-linked glycosylation [GO:0006487]	dolichyl-phosphate beta-glucosyltransferase activity [GO:0004581]	Glycosyltransferase 2 family
Tmtc3	current symbol	MGI:3036255	Tmtc3	transmembrane and tetratricopeptide repeat containing 3	protein coding gene	ENSMUSG00000036676	237500	Q8BRH0	Transfers mannosyl residues to the hydroxyl group of serine or threonine residues. The 4 members of the TMTC family are O-mannosyl-transferases dedicated primarily to the cadherin superfamily, each member seems to have a distinct role in decorating the cadherin domains with O-linked mannose glycans at specific regions. Also acts as O-mannosyl-transferase on other proteins such as PDIA3. Involved …	Protein modification; protein glycosylation. {ECO:0000250|UniProtKB:Q6ZXV5}.	bud outgrowth involved in lung branching [GO:0060447]; cell differentiation [GO:0030154]; lung alveolus development [GO:0048286]; lung development [GO:0030324]; muscle cell development [GO:0055001]; positive regulation of proteasomal protein catabolic process [GO:1901800]; post-embryonic development [GO:0009791]; protein O-linked mannosylation [GO:0035269]; regulation of gene expression [GO:00104…	dolichyl-phosphate-mannose-protein mannosyltransferase activity [GO:0004169]; mannosyltransferase activity [GO:0000030]	TMTC family
Tmtc2	current symbol	MGI:1914057	Tmtc2	transmembrane and tetratricopeptide repeat containing 2	protein coding gene	ENSMUSG00000036019	278279	Q56A06	Transfers mannosyl residues to the hydroxyl group of serine or threonine residues. The 4 members of the TMTC family are O-mannosyl-transferases dedicated primarily to the cadherin superfamily, each member seems to have a distinct role in decorating the cadherin domains with O-linked mannose glycans at specific regions. Also acts as O-mannosyl-transferase on other proteins such as PDIA3. {ECO:0000…	Protein modification; protein glycosylation. {ECO:0000250|UniProtKB:Q8N394}.	calcium ion homeostasis [GO:0055074]; protein O-linked mannosylation [GO:0035269]	dolichyl-phosphate-mannose-protein mannosyltransferase activity [GO:0004169]; mannosyltransferase activity [GO:0000030]	TMTC family
Pomt2	current symbol	MGI:2444430	Pomt2	protein-O-mannosyltransferase 2	protein coding gene	ENSMUSG00000034126	217734	Q8BGQ4	Transfers mannosyl residues to the hydroxyl group of serine or threonine residues. Coexpression of both POMT1 and POMT2 is necessary for enzyme activity, expression of either POMT1 or POMT2 alone is insufficient. Essentially dedicated to O-mannosylation of alpha-DAG1 and few other proteins but not of cadherins and protocaherins. {ECO:0000250|UniProtKB:Q9UKY4}.	Protein modification; protein glycosylation.	ER-associated misfolded protein catabolic process [GO:0071712]; positive regulation of protein O-linked glycosylation [GO:1904100]; protein O-linked mannosylation [GO:0035269]	dolichyl-phosphate-mannose-protein mannosyltransferase activity [GO:0004169]; mannosyltransferase activity [GO:0000030]	Glycosyltransferase 39 family
Pomt1	current symbol	MGI:2138994	Pomt1	protein-O-mannosyltransferase 1	protein coding gene	ENSMUSG00000039254	99011	Q8R2R1	Transfers mannosyl residues to the hydroxyl group of serine or threonine residues. Coexpression of both POMT1 and POMT2 is necessary for enzyme activity, expression of either POMT1 or POMT2 alone is insufficient. Essentially dedicated to O-mannosylation of alpha-DAG1 and few other proteins but not of cadherins and protocaherins. {ECO:0000250|UniProtKB:Q9Y6A1}.	Protein modification; protein glycosylation.	extracellular matrix organization [GO:0030198]; positive regulation of protein O-linked glycosylation [GO:1904100]; protein O-linked mannosylation [GO:0035269]	dolichyl-phosphate-mannose-protein mannosyltransferase activity [GO:0004169]; mannosyltransferase activity [GO:0000030]	Glycosyltransferase 39 family
Tmtc1	current symbol	MGI:3039590	Tmtc1	transmembrane and tetratricopeptide repeat containing 1	protein coding gene	ENSMUSG00000030306	387314	Q3UV71	Transfers mannosyl residues to the hydroxyl group of serine or threonine residues. The 4 members of the TMTC family are O-mannosyl-transferases dedicated primarily to the cadherin superfamily, each member seems to have a distinct role in decorating the cadherin domains with O-linked mannose glycans at specific regions. Also acts as O-mannosyl-transferase on other proteins such as PDIA3. {ECO:0000…	Protein modification; protein glycosylation. {ECO:0000250|UniProtKB:Q8IUR5}.	protein O-linked mannosylation [GO:0035269]; RNA processing [GO:0006396]	dolichyl-phosphate-mannose-protein mannosyltransferase activity [GO:0004169]; mannosyltransferase activity [GO:0000030]	TMTC family
Ugt1a10	current symbol	MGI:3580642	Ugt1a10	UDP glycosyltransferase 1 family, polypeptide A10	protein coding gene	ENSMUSG00000090165	394430	D3Z7G0	0	0	flavonoid glucuronidation [GO:0052696]; xenobiotic glucuronidation [GO:0052697]	drug binding [GO:0008144]; enzyme binding [GO:0019899]; enzyme inhibitor activity [GO:0004857]; fatty acid binding [GO:0005504]; glucuronosyltransferase activity [GO:0015020]; protein heterodimerization activity [GO:0046982]; protein homodimerization activity [GO:0042803]; protein kinase C binding [GO:0005080]; steroid binding [GO:0005496]	UDP-glycosyltransferase family
Fkrp	current symbol	MGI:2447586	Fkrp	fukutin related protein	protein coding gene	ENSMUSG00000048920	243853	Q8CG64	Catalyzes the transfer of CDP-ribitol to ribitol 5-phosphate previously attached by FKTN/fukutin of to the phosphorylated O-mannosyl trisaccharide (N-acetylgalactosamine-beta-3-N-acetylglucosamine-beta-4-(phosphate-6-)mannose), a carbohydrate structure present in alpha-dystroglycan (DAG1) (By similarity). This constitutes the second step in the formation of the ribose 5-phosphate tandem repeat wh…	Protein modification; protein glycosylation. {ECO:0000250|UniProtKB:Q9H9S5}.	glycoprotein biosynthetic process [GO:0009101]; protein O-linked mannosylation [GO:0035269]; protein processing [GO:0016485]	dystroglycan binding [GO:0002162]; identical protein binding [GO:0042802]; transferase activity [GO:0016740]	LicD transferase family
Poglut1	current symbol	MGI:2444232	Poglut1	protein O-glucosyltransferase 1	protein coding gene	ENSMUSG00000034064	224143	Q8BYB9	Dual specificity glycosyltransferase that catalyzes the transfer of glucose and xylose from UDP-glucose and UDP-xylose, respectively, to a serine residue found in the consensus sequence of C-X-S-X-P-C (PubMed:21949356, PubMed:26496195). Specifically targets extracellular EGF repeats of protein such as CRB2, F7, F9 and NOTCH2 (PubMed:21949356, PubMed:26496195). Acts as a positive regulator of Notc…	Protein modification; protein glycosylation. {ECO:0000269|PubMed:21949356, ECO:0000269|PubMed:26496195}.	axial mesoderm development [GO:0048318]; circulatory system development [GO:0072359]; gastrulation [GO:0007369]; muscle tissue development [GO:0060537]; paraxial mesoderm development [GO:0048339]; positive regulation of Notch signaling pathway [GO:0045747]; protein O-linked glycosylation [GO:0006493]; protein O-linked glycosylation via serine [GO:0018242]; regulation of gastrulation [GO:0010470];…	EGF-domain serine glucosyltransferase activity [GO:0140561]; EGF-domain serine xylosyltransferase activity [GO:0140562]; glucosyltransferase activity [GO:0046527]; UDP-glucosyltransferase activity [GO:0035251]; UDP-xylosyltransferase activity [GO:0035252]	Glycosyltransferase 90 family
Dpm3	current symbol	MGI:1915813	Dpm3	dolichyl-phosphate mannosyltransferase polypeptide 3	protein coding gene	ENSMUSG00000042737	68563	Q9D1Q4	Stabilizer subunit of the dolichol-phosphate mannose (DPM) synthase complex; tethers catalytic subunit DPM1 to the endoplasmic reticulum. {ECO:0000250}.	Protein modification; protein glycosylation.	GPI anchor biosynthetic process [GO:0006506]; protein glycosylation [GO:0006486]; regulation of protein stability [GO:0031647]	enzyme activator activity [GO:0008047]	DPM3 family
Ugt1a1	current symbol	MGI:98898	Ugt1a1	UDP glucuronosyltransferase 1 family, polypeptide A1	protein coding gene	ENSMUSG00000089960	394436	Q63886	UDP-glucuronosyltransferase (UGT) that catalyzes phase II biotransformation reactions in which lipophilic substrates are conjugated with glucuronic acid to increase the metabolite's water solubility, thereby facilitating excretion into either the urine or bile (By similarity). Essential for the elimination and detoxification of drugs, xenobiotics and endogenous compounds (By similarity). Catalyze…	0	acute-phase response [GO:0006953]; animal organ regeneration [GO:0031100]; biphenyl catabolic process [GO:0070980]; cellular glucuronidation [GO:0052695]; cellular response to estradiol stimulus [GO:0071392]; cellular response to ethanol [GO:0071361]; cellular response to glucocorticoid stimulus [GO:0071385]; estrogen metabolic process [GO:0008210]; flavone metabolic process [GO:0051552]; flavono…	enzyme binding [GO:0019899]; enzyme inhibitor activity [GO:0004857]; glucuronosyltransferase activity [GO:0015020]; protein heterodimerization activity [GO:0046982]; protein homodimerization activity [GO:0042803]; retinoic acid binding [GO:0001972]; steroid binding [GO:0005496]	UDP-glycosyltransferase family
Ugt1a5	current symbol	MGI:3032634	Ugt1a5	UDP glucuronosyltransferase 1 family, polypeptide A5	protein coding gene	ENSMUSG00000089943	394433	B2RT14	0	0	cellular glucuronidation [GO:0052695]; flavonoid glucuronidation [GO:0052696]; vitamin D3 metabolic process [GO:0070640]; xenobiotic glucuronidation [GO:0052697]	enzyme binding [GO:0019899]; glucuronosyltransferase activity [GO:0015020]; protein heterodimerization activity [GO:0046982]; protein homodimerization activity [GO:0042803]	UDP-glycosyltransferase family
Ugt1a2	current symbol	MGI:3576049	Ugt1a2	UDP glucuronosyltransferase 1 family, polypeptide A2	protein coding gene	ENSMUSG00000090171	22236	P70691	UDPGT is of major importance in the conjugation and subsequent elimination of potentially toxic xenobiotics and endogenous compounds.	0	bile acid secretion [GO:0032782]; cellular glucuronidation [GO:0052695]; estrogen metabolic process [GO:0008210]; flavonoid glucuronidation [GO:0052696]; vitamin D3 metabolic process [GO:0070640]; xenobiotic glucuronidation [GO:0052697]	enzyme binding [GO:0019899]; glucuronosyltransferase activity [GO:0015020]; protein heterodimerization activity [GO:0046982]; protein homodimerization activity [GO:0042803]; retinoic acid binding [GO:0001972]	UDP-glycosyltransferase family
Ugt1a6a	current symbol	MGI:2137698	Ugt1a6a	UDP glucuronosyltransferase 1 family, polypeptide A6A	protein coding gene	ENSMUSG00000054545	94284	Q64435	UDPGT is of major importance in the conjugation and subsequent elimination of potentially toxic xenobiotics and endogenous compounds. Conjugates small planar phenolic molecules such as 4-nitrophenol, 1-naphthol, and 4-methylumbelliferone. The bulky phenol 4-hydroxybiphenyl, androgens and estrogens are not substrates. 2-hydroxybiphenyl is an excellent substrate.	0	flavonoid glucuronidation [GO:0052696]; glucuronate metabolic process [GO:0019585]; xenobiotic glucuronidation [GO:0052697]	enzyme binding [GO:0019899]; glucuronosyltransferase activity [GO:0015020]; protein-containing complex binding [GO:0044877]; protein heterodimerization activity [GO:0046982]; protein homodimerization activity [GO:0042803]	UDP-glycosyltransferase family
Cd44	current symbol	MGI:88338	Cd44	CD44 antigen	protein coding gene	ENSMUSG00000005087	12505	P15379	Cell-surface receptor that plays a role in cell-cell interactions, cell adhesion and migration, helping them to sense and respond to changes in the tissue microenvironment. Participates thereby in a wide variety of cellular functions including the activation, recirculation and homing of T-lymphocytes, hematopoiesis, inflammation and response to bacterial infection. Engages, through its ectodomain…	0	branching involved in prostate gland morphogenesis [GO:0060442]; branching involved in ureteric bud morphogenesis [GO:0001658]; cell adhesion [GO:0007155]; cell migration [GO:0016477]; cellular response to fibroblast growth factor stimulus [GO:0044344]; cytokine-mediated signaling pathway [GO:0019221]; hyaluronan catabolic process [GO:0030214]; inflammatory response [GO:0006954]; macrophage fusio…	epidermal growth factor receptor binding [GO:0005154]; hyaluronic acid binding [GO:0005540]; phosphoprotein binding [GO:0051219]; protein kinase binding [GO:0019901]; transmembrane signaling receptor activity [GO:0004888]; type II transforming growth factor beta receptor binding [GO:0005114]	0
Neu2	current symbol	MGI:1344417	Neu2	neuraminidase 2	protein coding gene	ENSMUSG00000079434	23956	Q9JMH3	Exo-alpha-sialidase that catalyzes the hydrolytic cleavage of the terminal sialic acid (N-acetylneuraminic acid, Neu5Ac) of a glycan moiety in the catabolism of glycolipids, glycoproteins and oligosacharides (PubMed:10713120). Recognizes sialyl linkage positions of the glycan moiety as well as the supramolecular organization of the sialoglycoconjugate (By similarity). Displays preference for alph…	0	cellular oligosaccharide catabolic process [GO:0051692]; ganglioside catabolic process [GO:0006689]; glycoprotein catabolic process [GO:0006516]; oligosaccharide catabolic process [GO:0009313]; positive regulation of myoblast differentiation [GO:0045663]; positive regulation of myotube differentiation [GO:0010831]	exo-alpha-(2->3)-sialidase activity [GO:0052794]; exo-alpha-(2->6)-sialidase activity [GO:0052795]; exo-alpha-(2->8)-sialidase activity [GO:0052796]; exo-alpha-sialidase activity [GO:0004308]	Glycosyl hydrolase 33 family
Neu4	current symbol	MGI:2661364	Neu4	sialidase 4	protein coding gene	ENSMUSG00000034000	241159	Q8BZL1	Exo-alpha-sialidase that catalyzes the hydrolytic cleavage of the terminal sialic acid (N-acetylneuraminic acid, Neu5Ac) of a glycan moiety in the catabolism of glycolipids, glycoproteins and oligosacharides. Efficiently hydrolyzes gangliosides including alpha-(2->3)-sialylated GD1a and GM3 and alpha-(2->8)-sialylated GD3 (PubMed:19506080, PubMed:22393058). Hydrolyzes poly-alpha-(2->8)-sialylated…	0	ganglioside catabolic process [GO:0006689]; glycoprotein catabolic process [GO:0006516]; negative regulation of neuron projection development [GO:0010977]; oligosaccharide catabolic process [GO:0009313]	exo-alpha-(2->3)-sialidase activity [GO:0052794]; exo-alpha-(2->6)-sialidase activity [GO:0052795]; exo-alpha-(2->8)-sialidase activity [GO:0052796]; exo-alpha-sialidase activity [GO:0004308]	Glycosyl hydrolase 33 family
Bgn	current symbol	MGI:88158	Bgn	biglycan	protein coding gene	ENSMUSG00000031375	12111	P28653	May be involved in collagen fiber assembly. {ECO:0000250}.	0	articular cartilage development [GO:0061975]; blood vessel remodeling [GO:0001974]; bone development [GO:0060348]; peptide cross-linking via chondroitin 4-sulfate glycosaminoglycan [GO:0019800]	extracellular matrix binding [GO:0050840]; glycosaminoglycan binding [GO:0005539]	Small leucine-rich proteoglycan (SLRP) family, SLRP class I subfamily
Col15a1	current symbol	MGI:88449	Col15a1	collagen, type XV, alpha 1	protein coding gene	ENSMUSG00000028339	12819	O35206	Structural protein that stabilizes microvessels and muscle cells, both in heart and in skeletal muscle.; Restin potently inhibits angiogenesis.	0	angiogenesis [GO:0001525]; cell adhesion [GO:0007155]; endothelial cell morphogenesis [GO:0001886]; extracellular matrix organization [GO:0030198]	extracellular matrix structural constituent [GO:0005201]	Multiplexin collagen family
Col9a2	current symbol	MGI:88466	Col9a2	collagen, type IX, alpha 2	protein coding gene	ENSMUSG00000028626	12840	Q07643	Structural component of hyaline cartilage and vitreous of the eye.	0	extracellular matrix organization [GO:0030198]	extracellular matrix structural constituent [GO:0005201]	Fibril-associated collagens with interrupted helices (FACIT) family
Col9a3	current symbol	MGI:894686	Col9a3	collagen, type IX, alpha 3	protein coding gene	ENSMUSG00000027570	12841	A2ACT7	0	0	extracellular matrix organization [GO:0030198]; female gonad development [GO:0008585]; male gonad development [GO:0008584]	extracellular matrix structural constituent [GO:0005201]	0
Prelp	current symbol	MGI:2151110	Prelp	proline arginine-rich end leucine-rich repeat	protein coding gene	ENSMUSG00000041577	116847	Q9JK53	May anchor basement membranes to the underlying connective tissue. {ECO:0000250}.	0	cell aging [GO:0007569]	extracellular matrix structural constituent [GO:0005201]; heparin binding [GO:0008201]	Small leucine-rich proteoglycan (SLRP) family, SLRP class II subfamily
Col9a1	current symbol	MGI:88465	Col9a1	collagen, type IX, alpha 1	protein coding gene	ENSMUSG00000026147	12839	Q05722	Structural component of hyaline cartilage and vitreous of the eye.	0	bone morphogenesis [GO:0060349]; cartilage development [GO:0051216]; chondrocyte proliferation [GO:0035988]; extracellular matrix organization [GO:0030198]; growth plate cartilage development [GO:0003417]; skeletal system development [GO:0001501]; tissue homeostasis [GO:0001894]	extracellular matrix structural constituent [GO:0005201]; metal ion binding [GO:0046872]	Fibril-associated collagens with interrupted helices (FACIT) family
Sdc4	current symbol	MGI:1349164	Sdc4	syndecan 4	protein coding gene	ENSMUSG00000017009	20971	O35988	Cell surface proteoglycan that bears heparan sulfate. Regulates exosome biogenesis in concert with SDCBP and PDCD6IP. {ECO:0000250|UniProtKB:P31431}.	0	cell migration [GO:0016477]; inner ear receptor cell stereocilium organization [GO:0060122]; negative regulation of T cell proliferation [GO:0042130]; neural tube closure [GO:0001843]; positive regulation of exosomal secretion [GO:1903543]; positive regulation of extracellular exosome assembly [GO:1903553]; positive regulation of focal adhesion assembly [GO:0051894]; positive regulation of protei…	fibronectin binding [GO:0001968]; identical protein binding [GO:0042802]; protein kinase C binding [GO:0005080]; thrombospondin receptor activity [GO:0070053]	Syndecan proteoglycan family
Fuom	current symbol	MGI:1916314	Fuom	fucose mutarotase	protein coding gene	ENSMUSG00000025466	69064	Q8R2K1	Involved in the interconversion between alpha- and beta-L-fucoses. L-Fucose (6-deoxy-L-galactose) exists as alpha-L-fucose (29.5%) and beta-L-fucose (70.5%), the beta-form is metabolized through the salvage pathway. GDP-L-fucose formed either by the de novo or salvage pathways is transported into the endoplasmic reticulum, where it serves as a substrate for N- and O-glycosylations by fucosyltrans…	Carbohydrate metabolism; L-fucose metabolism. {ECO:0000269|PubMed:17602138, ECO:0000269|PubMed:19524593}.	female mating behavior [GO:0060180]; fucose metabolic process [GO:0006004]; fucosylation [GO:0036065]; negative regulation of neuron differentiation [GO:0045665]	fucose binding [GO:0042806]; L-fucose mutarotase activity [GO:0036373]; racemase and epimerase activity, acting on carbohydrates and derivatives [GO:0016857]	RbsD / FucU family
Fpgt	current symbol	MGI:1922790	Fpgt	fucose-1-phosphate guanylyltransferase	protein coding gene	ENSMUSG00000053870	75540	G5E8F4	Catalyzes the formation of GDP-L-fucose from GTP and L-fucose-1-phosphate (PubMed:14686921). Functions as a salvage pathway to reutilize L-fucose arising from the turnover of glycoproteins and glycolipids (Probable). {ECO:0000269|PubMed:14686921, ECO:0000305|PubMed:14686921}.	0	0	fucose-1-phosphate guanylyltransferase activity [GO:0047341]; GTP binding [GO:0005525]	0
Pofut1	current symbol	MGI:2153207	Pofut1	protein O-fucosyltransferase 1	protein coding gene	ENSMUSG00000046020	140484	Q91ZW2	Catalyzes the reaction that attaches fucose through an O-glycosidic linkage to a conserved serine or threonine residue found in the consensus sequence C2-X(4,5)-[S/T]-C3 of EGF domains, where C2 and C3 are the second and third conserved cysteines. Specifically uses GDP-fucose as donor substrate and proper disulfide pairing of the substrate EGF domains is required for fucose transfer. Plays a cruc…	Protein modification; protein glycosylation.	angiogenesis [GO:0001525]; fucose metabolic process [GO:0006004]; heart development [GO:0007507]; nervous system development [GO:0007399]; Notch signaling pathway [GO:0007219]; protein O-linked fucosylation [GO:0036066]; protein O-linked glycosylation [GO:0006493]; regulation of Notch signaling pathway [GO:0008593]; somitogenesis [GO:0001756]	fucosyltransferase activity [GO:0008417]; peptide-O-fucosyltransferase activity [GO:0046922]	Glycosyltransferase 65 family
Pofut2	current symbol	MGI:1916863	Pofut2	protein O-fucosyltransferase 2	protein coding gene	ENSMUSG00000020260	80294	Q8VHI3	Catalyzes the reaction that attaches fucose through an O-glycosidic linkage to a conserved serine or threonine residue in the consensus sequence C1-X(2,3)-S/T-C2-X(2)-G of thrombospondin type I repeats (TSRs) where C1 and C2 are the first and second cysteines of the repeat, respectively. O-fucosylates members of several protein families including the ADAMTS superfamily and the thrombosporin (TSP)…	Protein modification; protein glycosylation.	fucose metabolic process [GO:0006004]; fucosylation [GO:0036065]; mesoderm formation [GO:0001707]; positive regulation of protein folding [GO:1903334]; protein O-linked fucosylation [GO:0036066]; regulation of epithelial to mesenchymal transition [GO:0010717]; regulation of gene expression [GO:0010468]; regulation of secretion [GO:0051046]	fucosyltransferase activity [GO:0008417]; peptide-O-fucosyltransferase activity [GO:0046922]	Glycosyltransferase 68 family
Gal3st1	current symbol	MGI:1858277	Gal3st1	galactose-3-O-sulfotransferase 1	protein coding gene	ENSMUSG00000049721	53897	Q9JHE4	Catalyzes the transfer of a sulfate group to position 3 of non-reducing beta-galactosyl residues in glycerolipids and sphingolipids, therefore participates in the biosynthesis of sulfoglycolipids (PubMed:11917099). Catalyzes the synthesis of galactosylceramide sulfate (sulfatide), a major lipid component of the myelin sheath and of monogalactosylalkylacylglycerol sulfate (seminolipid), present in…	Lipid metabolism; sphingolipid metabolism. {ECO:0000269|PubMed:11917099}.	galactosylceramide biosynthetic process [GO:0006682]; galactosylceramide metabolic process [GO:0006681]; glycerolipid metabolic process [GO:0046486]; glycolipid biosynthetic process [GO:0009247]; myelination [GO:0042552]; spermatogenesis [GO:0007283]; sphingolipid metabolic process [GO:0006665]	galactose 3-O-sulfotransferase activity [GO:0050694]; galactosylceramide sulfotransferase activity [GO:0001733]; sulfotransferase activity [GO:0008146]	Galactose-3-O-sulfotransferase family
Gal3st3	current symbol	MGI:3617843	Gal3st3	galactose-3-O-sulfotransferase 3	protein coding gene	ENSMUSG00000047658	545276	P61315	Transfers a sulfate to position 3 of non-reducing beta-galactosyl residues in N-glycans and core2-branched O-glycans. Has high activity towards Gal-beta-1,4-GlcNAc, Gal-beta-1,4(Fuc-alpha-1,3)GlcNAc and lower activity towards Gal-beta-1,3(Fuc-alpha-1,4)GlcNAc (By similarity). {ECO:0000250}.	Protein modification; carbohydrate sulfation.	glycolipid biosynthetic process [GO:0009247]	galactose 3-O-sulfotransferase activity [GO:0050694]; galactosylceramide sulfotransferase activity [GO:0001733]; sulfotransferase activity [GO:0008146]	Galactose-3-O-sulfotransferase family
Gal3st2	current symbol	MGI:2685834	Gal3st2	galactose-3-O-sulfotransferase 2	protein coding gene	ENSMUSG00000094651	381334	Q6XQH0	Transfers a sulfate group to the hydroxyl group at C3 of non-reducing beta-galactosyl residues. Acts both on type 1 (Gal-beta-1,3-GlcNAc) and type 2 (Gal-beta-1,4-GlcNAc) chains with similar efficiency (By similarity). {ECO:0000250}.	Protein modification; carbohydrate sulfation.	glycolipid biosynthetic process [GO:0009247]; glycoprotein biosynthetic process [GO:0009101]; sulfation [GO:0051923]	galactose 3-O-sulfotransferase activity [GO:0050694]; galactosylceramide sulfotransferase activity [GO:0001733]; sulfotransferase activity [GO:0008146]	Galactose-3-O-sulfotransferase family
Gal3st4	current symbol	MGI:1916254	Gal3st4	galactose-3-O-sulfotransferase 4	protein coding gene	ENSMUSG00000075593	330217	E0CXV6	0	0	glycoprotein biosynthetic process [GO:0009101]	galactose 3-O-sulfotransferase activity [GO:0050694]; sulfotransferase activity [GO:0008146]	0
Clec4f	current symbol	MGI:1859834	Clec4f	C-type lectin domain family 4, member f	protein coding gene	ENSMUSG00000014542	51811	P70194	Receptor with an affinity for galactose and fucose. Could be involved in endocytosis.	0	endocytosis [GO:0006897]; NK T cell activation [GO:0051132]	galactose binding [GO:0005534]; glycolipid binding [GO:0051861]	0
Galc	current symbol	MGI:95636	Galc	galactosylceramidase	protein coding gene	ENSMUSG00000021003	14420	P54818	Hydrolyzes the galactose ester bonds of glycolipids such as galactosylceramide and galactosylsphingosine (PubMed:8769874, PubMed:10861297). Enzyme with very low activity responsible for the lysosomal catabolism of galactosylceramide, a major lipid in myelin, kidney and epithelial cells of small intestine and colon (By similarity). {ECO:0000250|UniProtKB:P54803, ECO:0000269|PubMed:10861297, ECO:00…	0	galactosylceramide catabolic process [GO:0006683]; myelination [GO:0042552]	galactosylceramidase activity [GO:0004336]	Glycosyl hydrolase 59 family
B3gat3	current symbol	MGI:1919977	B3gat3	beta-1,3-glucuronyltransferase 3 (glucuronosyltransferase I)	protein coding gene	ENSMUSG00000071649	72727	P58158	Glycosaminoglycans biosynthesis. Involved in forming the linkage tetrasaccharide present in heparan sulfate and chondroitin sulfate. Transfers a glucuronic acid moiety from the uridine diphosphate-glucuronic acid (UDP-GlcUA) to the common linkage region trisaccharide Gal-beta-1,3-Gal-beta-1,4-Xyl covalently bound to a Ser residue at the glycosaminylglycan attachment site of proteoglycans. Can als…	Protein modification; protein glycosylation.	carbohydrate metabolic process [GO:0005975]; chondroitin sulfate proteoglycan biosynthetic process [GO:0050650]; dermatan sulfate proteoglycan biosynthetic process [GO:0050651]; glycosaminoglycan biosynthetic process [GO:0006024]; heparan sulfate proteoglycan biosynthetic process [GO:0015012]; positive regulation of catalytic activity [GO:0043085]; positive regulation of intracellular protein tra…	galactosylgalactosylxylosylprotein 3-beta-glucuronosyltransferase activity [GO:0015018]; glucuronosyltransferase activity [GO:0015020]; metal ion binding [GO:0046872]; protein phosphatase activator activity [GO:0072542]	Glycosyltransferase 43 family
B3gat2	current symbol	MGI:2389490	B3gat2	beta-1,3-glucuronyltransferase 2 (glucuronosyltransferase S)	protein coding gene	ENSMUSG00000026156	280645	P59270	Involved in the biosynthesis of L2/HNK-1 carbohydrate epitope on both glycolipids and glycoproteins.	Protein modification; protein glycosylation.	carbohydrate biosynthetic process [GO:0016051]; carbohydrate metabolic process [GO:0005975]; chondroitin sulfate proteoglycan biosynthetic process [GO:0050650]; protein glycosylation [GO:0006486]	galactosylgalactosylxylosylprotein 3-beta-glucuronosyltransferase activity [GO:0015018]; metal ion binding [GO:0046872]	Glycosyltransferase 43 family
B3gat1	current symbol	MGI:1924148	B3gat1	beta-1,3-glucuronyltransferase 1 (glucuronosyltransferase P)	protein coding gene	ENSMUSG00000045994	76898	Q9CW73	Involved in the biosynthesis of L2/HNK-1 carbohydrate epitope on glycoproteins. Can also play a role in glycosaminoglycan biosynthesis. Substrates include asialo-orosomucoid (ASOR), asialo-fetuin, and asialo-neural cell adhesion molecule. Requires sphingomyelin for activity: stearoyl-sphingomyelin was the most effective, followed by palmitoyl-sphingomyelin and lignoceroyl-sphingomyelin. Activity …	Protein modification; protein glycosylation.	carbohydrate metabolic process [GO:0005975]; cellular response to hypoxia [GO:0071456]; chondroitin sulfate proteoglycan biosynthetic process [GO:0050650]; protein glycosylation [GO:0006486]	galactosylgalactosylxylosylprotein 3-beta-glucuronosyltransferase activity [GO:0015018]; metal ion binding [GO:0046872]; UDP-galactose:beta-N-acetylglucosamine beta-1,3-galactosyltransferase activity [GO:0008499]	Glycosyltransferase 43 family
C1galt1	current symbol	MGI:2151071	C1galt1	core 1 synthase, glycoprotein-N-acetylgalactosamine 3-beta-galactosyltransferase, 1	protein coding gene	ENSMUSG00000042460	94192	Q9JJ06	Glycosyltransferase that generates the core 1 O-glycan Gal-beta1-3GalNAc-alpha1-Ser/Thr (T antigen), which is a precursor for many extended O-glycans in glycoproteins. Plays a central role in many processes, such as angiogenesis, thrombopoiesis and kidney homeostasis development. {ECO:0000269|PubMed:14745002, ECO:0000269|PubMed:17062753}.	Protein modification; protein glycosylation.	angiogenesis [GO:0001525]; intestinal epithelial cell development [GO:0060576]; kidney development [GO:0001822]; O-glycan processing, core 1 [GO:0016267]; protein O-linked glycosylation [GO:0006493]	galactosyltransferase activity [GO:0008378]; glycoprotein-N-acetylgalactosamine 3-beta-galactosyltransferase activity [GO:0016263]; metal ion binding [GO:0046872]	Glycosyltransferase 31 family, Beta3-Gal-T subfamily
A4galt	current symbol	MGI:3512453	A4galt	alpha 1,4-galactosyltransferase	protein coding gene	ENSMUSG00000047878	239559	Q67BJ4	Catalyzes the transfer of galactose from UDP-alpha-D-galactose to lactosylceramide/beta-D-galactosyl-(1->4)-beta-D-glucosyl-(1<->1)-ceramide(d18:1(4E)) to produce globotriaosylceramide/globoside Gb3Cer (d18:1(4E)). Also able to transfer galactose to galactosylceramide/beta-D-Gal-(1<->1')-Cer. Globoside Gb3Cer is a glycosphingolipid of the globo serie, one of the major types of neutral root struct…	Glycolipid biosynthesis. {ECO:0000250|UniProtKB:Q9NPC4}.	globoside biosynthetic process [GO:0001576]; glycosphingolipid biosynthetic process [GO:0006688]; plasma membrane organization [GO:0007009]	galactosyltransferase activity [GO:0008378]; hexosyltransferase activity [GO:0016758]; lactosylceramide 4-alpha-galactosyltransferase activity [GO:0050512]; toxic substance binding [GO:0015643]	Glycosyltransferase 32 family
B4galt4	current symbol	MGI:1928387	B4galt4	UDP-Gal:betaGlcNAc beta 1,4-galactosyltransferase, polypeptide 4	protein coding gene	ENSMUSG00000022793	56375	Q9JJ04	Galactose (Gal) transferase involved in the biosynthesis of glycoproteins, proteoglycans, and glycosyphingolipids. Catalyzes the transfer of Gal residue via a beta1->4 linkage from UDP-Gal to the non-reducing terminal N-acetyl glucosamine 6-O-sulfate (6-O-sulfoGlcNAc) in the linearly growing chain of both N- and O-linked keratan sulfate proteoglycans. Cooperates with B3GNT7 N-acetyl glucosamine t…	Protein modification; protein glycosylation. {ECO:0000250|UniProtKB:O60513}.	carbohydrate metabolic process [GO:0005975]; glycosylation [GO:0070085]; protein glycosylation [GO:0006486]	galactosyltransferase activity [GO:0008378]; metal ion binding [GO:0046872]; N-acetyllactosamine synthase activity [GO:0003945]	Glycosyltransferase 7 family
B4galt5	current symbol	MGI:1927169	B4galt5	UDP-Gal:betaGlcNAc beta 1,4-galactosyltransferase, polypeptide 5	protein coding gene	ENSMUSG00000017929	56336	Q9JMK0	Catalyzes the synthesis of lactosylceramide (LacCer) via the transfer of galactose from UDP-galactose to glucosylceramide (GlcCer) (PubMed:21057870, PubMed:23882130, PubMed:30114188). LacCer is the starting point in the biosynthesis of all gangliosides (membrane-bound glycosphingolipids) which play pivotal roles in the CNS including neuronal maturation and axonal and myelin formation (PubMed:3011…	Protein modification; protein glycosylation.; Sphingolipid metabolism.	central nervous system myelination [GO:0022010]; central nervous system neuron axonogenesis [GO:0021955]; ganglioside biosynthetic process via lactosylceramide [GO:0010706]; glycoprotein biosynthetic process [GO:0009101]; glycosylation [GO:0070085]; neuron maturation [GO:0042551]; poly-N-acetyllactosamine biosynthetic process [GO:0030311]; positive regulation of embryonic development [GO:0040019]…	galactosyltransferase activity [GO:0008378]; metal ion binding [GO:0046872]; N-acetyllactosamine synthase activity [GO:0003945]; UDP-galactose:glucosylceramide beta-1,4-galactosyltransferase activity [GO:0008489]	Glycosyltransferase 7 family
B4galt6	current symbol	MGI:1928380	B4galt6	UDP-Gal:betaGlcNAc beta 1,4-galactosyltransferase, polypeptide 6	protein coding gene	ENSMUSG00000056124	56386	Q9WVK5	Catalyzes the synthesis of lactosylceramide (LacCer) via the transfer of galactose from UDP-galactose to glucosylceramide (GlcCer) (PubMed:23882130, PubMed:30114188). LacCer is the starting point in the biosynthesis of all gangliosides (membrane-bound glycosphingolipids) which play pivotal roles in the CNS including neuronal maturation and axonal and myelin formation (PubMed:30114188). {ECO:00002…	Protein modification; protein glycosylation.; Sphingolipid metabolism.	carbohydrate metabolic process [GO:0005975]; central nervous system myelination [GO:0022010]; central nervous system neuron axonogenesis [GO:0021955]; ganglioside biosynthetic process via lactosylceramide [GO:0010706]; glycosphingolipid biosynthetic process [GO:0006688]; glycosylation [GO:0070085]; lactosylceramide biosynthetic process [GO:0001572]; neuron maturation [GO:0042551]; protein glycosy…	galactosyltransferase activity [GO:0008378]; metal ion binding [GO:0046872]; UDP-galactose:glucosylceramide beta-1,4-galactosyltransferase activity [GO:0008489]	Glycosyltransferase 7 family
B3galt6	current symbol	MGI:2152819	B3galt6	UDP-Gal:betaGal beta 1,3-galactosyltransferase, polypeptide 6	protein coding gene	ENSMUSG00000050796	117592	Q91Z92	Beta-1,3-galactosyltransferase that transfers galactose from UDP-galactose to substrates with a terminal beta-linked galactose residue. Has a preference for galactose-beta-1,4-xylose that is found in the linker region of glycosaminoglycans, such as heparan sulfate and chondroitin sulfate. Has no activity towards substrates with terminal glucosamine or galactosamine residues. {ECO:0000250|UniProtK…	Glycan metabolism; chondroitin sulfate biosynthesis. {ECO:0000250|UniProtKB:Q96L58}.; Glycan metabolism; heparan sulfate biosynthesis. {ECO:0000250|UniProtKB:Q96L58}.	chondroitin sulfate biosynthetic process [GO:0030206]; glycosaminoglycan biosynthetic process [GO:0006024]; heparan sulfate proteoglycan biosynthetic process [GO:0015012]; protein glycosylation [GO:0006486]; proteoglycan biosynthetic process [GO:0030166]	galactosylxylosylprotein 3-beta-galactosyltransferase activity [GO:0047220]; UDP-galactose:beta-N-acetylglucosamine beta-1,3-galactosyltransferase activity [GO:0008499]; UDP-galactosyltransferase activity [GO:0035250]	Glycosyltransferase 31 family
Alg11	current symbol	MGI:2142632	Alg11	asparagine-linked glycosylation 11 (alpha-1,2-mannosyltransferase)	protein coding gene	ENSMUSG00000063362	207958	Q3TZM9	Mannosyltransferase involved in the last steps of the synthesis of Man5GlcNAc(2)-PP-dolichol core oligosaccharide on the cytoplasmic face of the endoplasmic reticulum. Catalyzes the addition of the 4th and 5th mannose residues to the dolichol-linked oligosaccharide chain (By similarity). {ECO:0000250}.	0	oligosaccharide-lipid intermediate biosynthetic process [GO:0006490]; protein N-linked glycosylation [GO:0006487]	GDP-Man:Man3GlcNAc2-PP-Dol alpha-1,2-mannosyltransferase activity [GO:0004377]	Glycosyltransferase group 1 family, Glycosyltransferase 4 subfamily
Gmds	current symbol	MGI:1891112	Gmds	GDP-mannose 4, 6-dehydratase	protein coding gene	ENSMUSG00000038372	218138	Q8K0C9	Catalyzes the conversion of GDP-D-mannose to GDP-4-dehydro-6-deoxy-D-mannose. {ECO:0000250}.	Nucleotide-sugar biosynthesis; GDP-L-fucose biosynthesis via de novo pathway; GDP-L-fucose from GDP-alpha-D-mannose: step 1/2.	'de novo' GDP-L-fucose biosynthetic process [GO:0042351]; GDP-mannose metabolic process [GO:0019673]; Notch signaling pathway [GO:0007219]	GDP-mannose 4,6-dehydratase activity [GO:0008446]; identical protein binding [GO:0042802]; NADP+ binding [GO:0070401]	NAD(P)-dependent epimerase/dehydratase family, GDP-mannose 4,6-dehydratase subfamily
Gbgt1	current symbol	MGI:2449143	Gbgt1	globoside alpha-1,3-N-acetylgalactosaminyltransferase 1	protein coding gene	ENSMUSG00000026829	227671	Q8VI38	Catalyzes the formation of Forssman glycolipid via the addition of N-acetylgalactosamine (GalNAc) in alpha-1,3-linkage to GalNAcb-1,3Gala-1,4Galb-1,4GlcCer (Gb4Cer) (PubMed:14573676). Forssman glycolipid (also called Forssman antigen; FG) probably serves for adherence of some pathogens (PubMed:14573676). Conversely, it diminishes Shiga toxins susceptibility (PubMed:14573676). {ECO:0000269|PubMed:…	Protein modification; protein glycosylation.	carbohydrate metabolic process [GO:0005975]; globoside metabolic process [GO:0001575]; lipid glycosylation [GO:0030259]; protein glycosylation [GO:0006486]	globoside alpha-N-acetylgalactosaminyltransferase activity [GO:0047277]; glycosyltransferase activity [GO:0016757]; metal ion binding [GO:0046872]	Glycosyltransferase 6 family
Gnpnat1	current symbol	MGI:1858963	Gnpnat1	glucosamine-phosphate N-acetyltransferase 1	protein coding gene	ENSMUSG00000037722	54342	Q9JK38	0	Nucleotide-sugar biosynthesis; UDP-N-acetyl-alpha-D-glucosamine biosynthesis; N-acetyl-alpha-D-glucosamine 1-phosphate from alpha-D-glucosamine 6-phosphate (route I): step 1/2.	cellular response to leukemia inhibitory factor [GO:1990830]; glucosamine metabolic process [GO:0006041]; N-acetylglucosamine metabolic process [GO:0006044]; UDP-N-acetylglucosamine biosynthetic process [GO:0006048]	glucosamine 6-phosphate N-acetyltransferase activity [GO:0004343]; identical protein binding [GO:0042802]; monosaccharide binding [GO:0048029]; N-acetyltransferase activity [GO:0008080]	Acetyltransferase family, GNA1 subfamily
Gnpda1	current symbol	MGI:1347054	Gnpda1	glucosamine-6-phosphate deaminase 1	protein coding gene	ENSMUSG00000052102	26384	O88958	Seems to trigger calcium oscillations in mammalian eggs. These oscillations serve as the essential trigger for egg activation and early development of the embryo (By similarity). {ECO:0000250}.	0	acrosome reaction [GO:0007340]; fructose 6-phosphate metabolic process [GO:0006002]; fructose biosynthetic process [GO:0046370]; generation of precursor metabolites and energy [GO:0006091]; glucosamine catabolic process [GO:0006043]; glucosamine metabolic process [GO:0006041]; N-acetylglucosamine catabolic process [GO:0006046]; N-acetylneuraminate catabolic process [GO:0019262]; UDP-N-acetylgluco…	glucosamine-6-phosphate deaminase activity [GO:0004342]; identical protein binding [GO:0042802]	Glucosamine/galactosamine-6-phosphate isomerase family
Gnpda2	current symbol	MGI:1915230	Gnpda2	glucosamine-6-phosphate deaminase 2	protein coding gene	ENSMUSG00000029209	67980	Q9CRC9	0	0	carbohydrate metabolic process [GO:0005975]; glucosamine catabolic process [GO:0006043]; N-acetylglucosamine catabolic process [GO:0006046]; N-acetylneuraminate catabolic process [GO:0019262]; UDP-N-acetylglucosamine biosynthetic process [GO:0006048]	glucosamine-6-phosphate deaminase activity [GO:0004342]; identical protein binding [GO:0042802]	Glucosamine/galactosamine-6-phosphate isomerase family
Pigw	current symbol	MGI:1917575	Pigw	phosphatidylinositol glycan anchor biosynthesis, class W	protein coding gene	ENSMUSG00000045140	70325	Q8C398	Required for the transport of GPI-anchored proteins to the plasma membrane. Probable acetyltransferase, which acetylates the inositol ring of phosphatidylinositol during biosynthesis of GPI-anchor. Acetylation during GPI-anchor biosynthesis is not essential for the subsequent mannosylation and is usually removed soon after the attachment of GPIs to proteins. {ECO:0000250|UniProtKB:Q7TSN4}.	Glycolipid biosynthesis; glycosylphosphatidylinositol-anchor biosynthesis. {ECO:0000250|UniProtKB:Q7TSN4}.	GPI anchor biosynthetic process [GO:0006506]; protein localization to plasma membrane [GO:0072659]	glucosaminyl-phosphatidylinositol O-acyltransferase activity [GO:0032216]	PIGW family
Gyg	current symbol	MGI:1351614	Gyg	glycogenin	protein coding gene	ENSMUSG00000019528	27357	Q9R062	Self-glucosylates, via an inter-subunit mechanism, to form an oligosaccharide primer that serves as substrate for glycogen synthase. {ECO:0000250|UniProtKB:P46976}.	Glycan biosynthesis; glycogen biosynthesis. {ECO:0000250|UniProtKB:P46976}.	glycogen biosynthetic process [GO:0005978]	glucose binding [GO:0005536]; glycogenin glucosyltransferase activity [GO:0008466]; glycosyltransferase activity [GO:0016757]; manganese ion binding [GO:0030145]; protein homodimerization activity [GO:0042803]; UDP-alpha-D-glucose:glucosyl-glycogenin alpha-D-glucosyltransferase activity [GO:0102751]	Glycosyltransferase 8 family, Glycogenin subfamily
Ugp2	current symbol	MGI:2183447	Ugp2	UDP-glucose pyrophosphorylase 2	protein coding gene	ENSMUSG00000001891	216558	Q91ZJ5	UTP--glucose-1-phosphate uridylyltransferase catalyzing the conversion of glucose-1-phosphate into UDP-glucose, a crucial precursor for the production of glycogen. {ECO:0000250|UniProtKB:Q16851}.	Glycan biosynthesis; glycogen biosynthesis. {ECO:0000250|UniProtKB:Q16851}.	brain development [GO:0007420]; glucose 1-phosphate metabolic process [GO:0019255]; glycogen biosynthetic process [GO:0005978]; glycogen metabolic process [GO:0005977]; UDP-glucose metabolic process [GO:0006011]	glucose binding [GO:0005536]; identical protein binding [GO:0042802]; metal ion binding [GO:0046872]; pyrimidine ribonucleotide binding [GO:0032557]; UTP:glucose-1-phosphate uridylyltransferase activity [GO:0003983]	UDPGP type 1 family
Ugt2b35	current symbol	MGI:3576100	Ugt2b35	UDP glucuronosyltransferase 2 family, polypeptide B35	protein coding gene	ENSMUSG00000035811	243085	Q3UEI8	0	0	0	glucuronosyltransferase activity [GO:0015020]	UDP-glycosyltransferase family
Ugt2b34	current symbol	MGI:2140962	Ugt2b34	UDP glucuronosyltransferase 2 family, polypeptide B34	protein coding gene	ENSMUSG00000029260	100727	E9PZ30	0	0	0	glucuronosyltransferase activity [GO:0015020]	UDP-glycosyltransferase family
Ugt2b37	current symbol	MGI:2148239	Ugt2b37	UDP glucuronosyltransferase 2 family, polypeptide B37	protein coding gene	ENSMUSG00000057425	112417	Q8VCN3	0	0	0	glucuronosyltransferase activity [GO:0015020]	UDP-glycosyltransferase family
Ugt2a2	current symbol	MGI:3576095	Ugt2a2	UDP glucuronosyltransferase 2 family, polypeptide A2	protein coding gene	ENSMUSG00000029268	552899	Q6PDD0	UDP-glucuronosyltransferase (UGT) that catalyzes phase II biotransformation reactions in which lipophilic substrates are conjugated with glucuronic acid to increase the metabolite's water solubility, thereby facilitating excretion into either the urine or bile. Essential for the elimination and detoxification of drugs, xenobiotics and endogenous compounds. Catalyzes the glucuronidation of endogen…	0	bile acid metabolic process [GO:0008206]; cellular glucuronidation [GO:0052695]	glucuronosyltransferase activity [GO:0015020]	UDP-glycosyltransferase family
Ugt2a1	current symbol	MGI:2149905	Ugt2a1	UDP glucuronosyltransferase 2 family, polypeptide A1	protein coding gene	ENSMUSG00000106677	94215	Q80X89	UDP-glucuronosyltransferase (UGT) that catalyzes phase II biotransformation reactions in which lipophilic substrates are conjugated with glucuronic acid to increase the metabolite's water solubility, thereby facilitating excretion into either the urine or bile. Essential for the elimination and detoxification of drugs, xenobiotics and endogenous compounds. Catalyzes the glucuronidation of endogen…	0	bile acid metabolic process [GO:0008206]; cellular glucuronidation [GO:0052695]; response to stimulus [GO:0050896]; sensory perception of chemical stimulus [GO:0007606]; sensory perception of smell [GO:0007608]	glucuronosyltransferase activity [GO:0015020]	UDP-glycosyltransferase family
Ugt2b1	current symbol	MGI:1919023	Ugt2b1	UDP glucuronosyltransferase 2 family, polypeptide B1	protein coding gene	ENSMUSG00000035836	71773	Q8R084	0	0	biphenyl catabolic process [GO:0070980]; cellular glucuronidation [GO:0052695]; cellular response to ethanol [GO:0071361]; cellular response to glucocorticoid stimulus [GO:0071385]; cellular response to growth hormone stimulus [GO:0071378]; cellular response to testosterone stimulus [GO:0071394]; estrogen metabolic process [GO:0008210]; response to lipopolysaccharide [GO:0032496]	glucuronosyltransferase activity [GO:0015020]	UDP-glycosyltransferase family
Ugt2a3	current symbol	MGI:1919344	Ugt2a3	UDP glucuronosyltransferase 2 family, polypeptide A3	protein coding gene	ENSMUSG00000035780	72094	Q8BWQ1	UDP-glucuronosyltransferases catalyze phase II biotransformation reactions in which lipophilic substrates are conjugated with glucuronic acid to increase water solubility and enhance excretion. They are of major importance in the conjugation and subsequent elimination of potentially toxic xenobiotics and endogenous compounds (By similarity). {ECO:0000250}.	0	cellular glucuronidation [GO:0052695]	glucuronosyltransferase activity [GO:0015020]	UDP-glycosyltransferase family
B4gat1	current symbol	MGI:1919680	B4gat1	beta-1,4-glucuronyltransferase 1	protein coding gene	ENSMUSG00000047379	108902	Q8BWP8	Beta-1,4-glucuronyltransferase involved in O-mannosylation of alpha-dystroglycan (DAG1) (PubMed:23217742, PubMed:25279699). Transfers a glucuronic acid (GlcA) residue onto a xylose (Xyl) acceptor to produce the glucuronyl-beta-1,4-xylose-beta disaccharide primer, which is further elongated by LARGE1, during synthesis of phosphorylated O-mannosyl glycan (PubMed:25279699). Phosphorylated O-mannosyl…	Protein modification; protein glycosylation. {ECO:0000269|PubMed:25279699}.	axon guidance [GO:0007411]; protein glycosylation [GO:0006486]; protein O-linked mannosylation [GO:0035269]	glucuronosyltransferase activity [GO:0015020]; metal ion binding [GO:0046872]	Glycosyltransferase 49 family
Ugt3a1	current symbol	MGI:2146055	Ugt3a1	UDP glycosyltransferases 3 family, polypeptide A1	protein coding gene	ENSMUSG00000072664	105887	Q3UP75	UDP-glucuronosyltransferases catalyze phase II biotransformation reactions in which lipophilic substrates are conjugated with glucuronic acid to increase water solubility and enhance excretion. They are of major importance in the conjugation and subsequent elimination of potentially toxic xenobiotics and endogenous compounds (By similarity). {ECO:0000250}.	0	cellular response to genistein [GO:0071412]	glucuronosyltransferase activity [GO:0015020]; UDP-glycosyltransferase activity [GO:0008194]	UDP-glycosyltransferase family
Extl3	current symbol	MGI:1860765	Extl3	exostosin-like glycosyltransferase 3	protein coding gene	ENSMUSG00000021978	54616	Q9WVL6	Glycosyltransferase which regulates the biosynthesis of heparan sulfate (HS). Important for both skeletal development and hematopoiesis, through the formation of HS proteoglycans (HSPGs). Required for the function of REG3A in regulating keratinocyte proliferation and differentiation (By similarity). {ECO:0000250|UniProtKB:O43909}.	Glycan metabolism; heparan sulfate biosynthesis. {ECO:0000250|UniProtKB:O43909}.	heparan sulfate proteoglycan biosynthetic process [GO:0015012]; positive regulation of cell growth [GO:0030307]; protein glycosylation [GO:0006486]	glucuronyl-galactosyl-proteoglycan 4-alpha-N-acetylglucosaminyltransferase activity [GO:0001888]; glycosyltransferase activity [GO:0016757]; metal ion binding [GO:0046872]	Glycosyltransferase 47 family
C1galt1c1	current symbol	MGI:1913493	C1galt1c1	C1GALT1-specific chaperone 1	protein coding gene	ENSMUSG00000048970	59048	Q9JMG2	Probable chaperone required for the generation of 1 O-glycan Gal-beta1-3GalNAc-alpha1-Ser/Thr (T antigen), which is a precursor for many extended O-glycans in glycoproteins. Probably acts as a specific molecular chaperone assisting the folding/stability of core 1 beta-3-galactosyltransferase (C1GALT1) (By similarity). {ECO:0000250}.	0	O-glycan processing, core 1 [GO:0016267]; platelet activation [GO:0030168]; platelet morphogenesis [GO:0036344]; protein O-linked glycosylation [GO:0006493]	glycoprotein-N-acetylgalactosamine 3-beta-galactosyltransferase activity [GO:0016263]	Glycosyltransferase 31 family, Beta3-Gal-T subfamily
B3gntl1	current symbol	MGI:2441705	B3gntl1	UDP-GlcNAc:betaGal beta-1,3-N-acetylglucosaminyltransferase-like 1	protein coding gene	ENSMUSG00000046605	210004	Q3U129	Putative glycosyltransferase. {ECO:0000305}.	0	0	glycosyltransferase activity [GO:0016757]	Glycosyltransferase 2 family
Gtdc1	current symbol	MGI:2444269	Gtdc1	glycosyltransferase-like domain containing 1	protein coding gene	ENSMUSG00000036890	227835	Q8BW56	0	0	0	glycosyltransferase activity [GO:0016757]	Glycosyltransferase group 1 family, Glycosyltransferase 4 subfamily
Glt1d1	current symbol	MGI:2442755	Glt1d1	glycosyltransferase 1 domain containing 1	protein coding gene	ENSMUSG00000049971	319804	A4FUP9	0	0	0	glycosyltransferase activity [GO:0016757]	Glycosyltransferase group 1 family, Glycosyltransferase 4 subfamily
Glt8d2	current symbol	MGI:1922032	Glt8d2	glycosyltransferase 8 domain containing 2	protein coding gene	ENSMUSG00000020251	74782	Q640P4	0	0	0	glycosyltransferase activity [GO:0016757]	Glycosyltransferase 8 family
Glt8d1	current symbol	MGI:1923735	Glt8d1	glycosyltransferase 8 domain containing 1	protein coding gene	ENSMUSG00000021916	76485	Q6NSU3	0	0	0	glycosyltransferase activity [GO:0016757]	Glycosyltransferase 8 family
Glt6d1	current symbol	MGI:1918353	Glt6d1	glycosyltransferase 6 domain containing 1	protein coding gene	ENSMUSG00000036401	71103	Q2NKH9	0	0	carbohydrate metabolic process [GO:0005975]; lipid glycosylation [GO:0030259]	glycosyltransferase activity [GO:0016757]; hexosyltransferase activity [GO:0016758]	Glycosyltransferase 6 family
Dpagt1	current symbol	MGI:1196396	Dpagt1	dolichyl-phosphate (UDP-N-acetylglucosamine) acetylglucosaminephosphotransferase 1 (GlcNAc-1-P transferase)	protein coding gene	ENSMUSG00000032123	13478	P42867	Catalyzes the initial step of dolichol-linked oligosaccharide biosynthesis in N-linked protein glycosylation pathway: transfers GlcNAc-1-P from UDP-GlcNAc onto the carrier lipid dolichyl phosphate (P-dolichol), yielding GlcNAc-P-P-dolichol. {ECO:0000250|UniProtKB:Q9H3H5}.	Protein modification; protein glycosylation. {ECO:0000250|UniProtKB:Q9H3H5}.	dolichol-linked oligosaccharide biosynthetic process [GO:0006488]; dolichol metabolic process [GO:0019348]; dolichyl diphosphate biosynthetic process [GO:0006489]; protein N-linked glycosylation [GO:0006487]; UDP-N-acetylglucosamine metabolic process [GO:0006047]	glycosyltransferase activity [GO:0016757]; metal ion binding [GO:0046872]; phospho-N-acetylmuramoyl-pentapeptide-transferase activity [GO:0008963]; UDP-N-acetylglucosamine-dolichyl-phosphate N-acetylglucosaminephosphotransferase activity [GO:0003975]; UDP-N-acetylglucosamine-lysosomal-enzyme N-acetylglucosaminephosphotransferase activity [GO:0003976]	Glycosyltransferase 4 family
Eogt	current symbol	MGI:2141669	Eogt	EGF domain-specific O-linked N-acetylglucosamine (GlcNAc) transferase	protein coding gene	ENSMUSG00000035245	101351	Q8BYW9	Catalyzes the transfer of a single N-acetylglucosamine from UDP-GlcNAc to a serine or threonine residue in extracellular proteins resulting in their modification with a beta-linked N-acetylglucosamine (O-GlcNAc). Specifically glycosylates the Thr residue located between the fifth and sixth conserved cysteines of folded EGF-like domains. {ECO:0000269|PubMed:22310717}.	0	protein O-GlcNAcylation via threonine [GO:0097370]; protein O-linked glycosylation [GO:0006493]	glycosyltransferase activity [GO:0016757]; protein N-acetylglucosaminyltransferase activity [GO:0016262]; protein O-GlcNAc transferase activity [GO:0097363]	Glycosyltransferase 61 family
Pigk	current symbol	MGI:1913863	Pigk	phosphatidylinositol glycan anchor biosynthesis, class K	protein coding gene	ENSMUSG00000039047	329777	Q9CXY9	Mediates GPI anchoring in the endoplasmic reticulum, by replacing a protein's C-terminal GPI attachment signal peptide with a pre-assembled GPI. During this transamidation reaction, the GPI transamidase forms a carbonyl intermediate with the substrate protein (By similarity). {ECO:0000250}.	Glycolipid biosynthesis; glycosylphosphatidylinositol-anchor biosynthesis.	attachment of GPI anchor to protein [GO:0016255]; protein localization to cell surface [GO:0034394]	GPI-anchor transamidase activity [GO:0003923]	Peptidase C13 family
Ogn	current symbol	MGI:109278	Ogn	osteoglycin	protein coding gene	ENSMUSG00000021390	18295	Q62000	Induces bone formation in conjunction with TGF-beta-1 or TGF-beta-2. {ECO:0000250}.	0	0	growth factor activity [GO:0008083]	Small leucine-rich proteoglycan (SLRP) family, SLRP class III subfamily
Reg1	current symbol	MGI:97895	Reg1	regenerating islet-derived 1	protein coding gene	ENSMUSG00000059654	19692	P43137	Might act as an inhibitor of spontaneous calcium carbonate precipitation.	0	antimicrobial humoral immune response mediated by antimicrobial peptide [GO:0061844]; calcium ion homeostasis [GO:0055074]; cellular response to chemokine [GO:1990869]; cellular response to gastrin [GO:1990878]; cell wall disruption in other organism [GO:0044278]; liver regeneration [GO:0097421]; midgut development [GO:0007494]; negative regulation of cell population proliferation [GO:0008285]; p…	growth factor activity [GO:0008083]; identical protein binding [GO:0042802]; oligosaccharide binding [GO:0070492]; peptidoglycan binding [GO:0042834]; phosphatase binding [GO:0019902]; protein phosphatase binding [GO:0019903]; signaling receptor activity [GO:0038023]; signaling receptor binding [GO:0005102]	0
Reg3b	current symbol	MGI:97478	Reg3b	regenerating islet-derived 3 beta	protein coding gene	ENSMUSG00000071356	18489	P35230	Bactericidal C-type lectin which acts against several intestinal Gram-positive and Gram-negative bacteria. Lacks antibacterial activity against S.typhimurium. May play a role in protection against infection with S.enteritidis by inhibiting its translocation from the gut lumen into intestinal tissues and further extraintestinal tissues. {ECO:0000269|PubMed:21694778, ECO:0000269|PubMed:22252863}.	0	acute-phase response [GO:0006953]; antimicrobial humoral immune response mediated by antimicrobial peptide [GO:0061844]; cell wall disruption in other organism [GO:0044278]; defense response to Gram-negative bacterium [GO:0050829]; defense response to Gram-positive bacterium [GO:0050830]; negative regulation of cell death [GO:0060548]; negative regulation of hydrogen peroxide-induced neuron death…	growth factor binding [GO:0019838]; identical protein binding [GO:0042802]; oligosaccharide binding [GO:0070492]; peptidoglycan binding [GO:0042834]; signaling receptor activity [GO:0038023]	0
Gmppb	current symbol	MGI:2660880	Gmppb	GDP-mannose pyrophosphorylase B	protein coding gene	ENSMUSG00000070284	331026	Q8BTZ7	Catalyzes the formation of GDP-mannose, an essential precursor of glycan moieties of glycoproteins and glycolipids. {ECO:0000250|UniProtKB:P0C5I2}.	Nucleotide-sugar biosynthesis; GDP-alpha-D-mannose biosynthesis; GDP-alpha-D-mannose from alpha-D-mannose 1-phosphate (GTP route): step 1/1. {ECO:0000250|UniProtKB:P0C5I2}.	GDP-mannose biosynthetic process [GO:0009298]	GTP binding [GO:0005525]; mannose-1-phosphate guanylyltransferase activity [GO:0004475]	Transferase hexapeptide repeat family
Hs2st1	current symbol	MGI:1346049	Hs2st1	heparan sulfate 2-O-sulfotransferase 1	protein coding gene	ENSMUSG00000040151	23908	Q8R3H7	Catalyzes the transfer of sulfate to the C2-position of selected hexuronic acid residues within the maturing heparan sulfate (HS). 2-O-sulfation within HS, particularly of iduronate residues, is essential for HS to participate in a variety of high-affinity ligand-binding interactions and signaling processes. Required for metanephric development of kidney formation, suggesting that 2-O-sulfation w…	0	gene expression [GO:0010467]; heparan sulfate proteoglycan biosynthetic process, enzymatic modification [GO:0015015]; heparan sulfate proteoglycan biosynthetic process, polysaccharide chain biosynthetic process [GO:0015014]; heparin metabolic process [GO:0030202]; ureteric bud formation [GO:0060676]	heparan sulfate 2-O-sulfotransferase activity [GO:0004394]; sulfotransferase activity [GO:0008146]	Sulfotransferase 3 family
Hs6st1	current symbol	MGI:1354958	Hs6st1	heparan sulfate 6-O-sulfotransferase 1	protein coding gene	ENSMUSG00000045216	50785	Q9QYK5	6-O-sulfation enzyme which catalyzes the transfer of sulfate from 3'-phosphoadenosine 5'-phosphosulfate (PAPS) to position 6 of the N-sulfoglucosamine residue (GlcNS) of heparan sulfate. Critical for normal neuronal development where it may play a role in neuron branching. May also play a role in limb development. May prefer iduronic acid. {ECO:0000269|PubMed:10644753}.	0	angiogenesis [GO:0001525]; heparan sulfate proteoglycan biosynthetic process [GO:0015012]; heparan sulfate proteoglycan biosynthetic process, enzymatic modification [GO:0015015]; labyrinthine layer blood vessel development [GO:0060716]; lung alveolus development [GO:0048286]; neuron development [GO:0048666]	heparan sulfate 6-O-sulfotransferase activity [GO:0017095]	Sulfotransferase 6 family
Hs6st3	current symbol	MGI:1354960	Hs6st3	heparan sulfate 6-O-sulfotransferase 3	protein coding gene	ENSMUSG00000053465	50787	Q9QYK4	6-O-sulfation enzyme which catalyzes the transfer of sulfate from 3'-phosphoadenosine 5'-phosphosulfate (PAPS) to position 6 of the N-sulfoglucosamine residue (GlcNS) of heparan sulfate.	0	heparan sulfate proteoglycan biosynthetic process, enzymatic modification [GO:0015015]	heparan sulfate 6-O-sulfotransferase activity [GO:0017095]	Sulfotransferase 6 family
Hs6st2	current symbol	MGI:1354959	Hs6st2	heparan sulfate 6-O-sulfotransferase 2	protein coding gene	ENSMUSG00000062184	50786	Q80UW0	6-O-sulfation enzyme which catalyzes the transfer of sulfate from 3'-phosphoadenosine 5'-phosphosulfate (PAPS) to position 6 of the N-sulfoglucosamine residue (GlcNS) of heparan sulfate.	0	heparan sulfate proteoglycan biosynthetic process, enzymatic modification [GO:0015015]	heparan sulfate 6-O-sulfotransferase activity [GO:0017095]	Sulfotransferase 6 family
Reg4	current symbol	MGI:1914959	Reg4	regenerating islet-derived family, member 4	protein coding gene	ENSMUSG00000027876	67709	Q9D8G5	Calcium-independent lectin displaying mannose-binding specificity and able to maintain carbohydrate recognition activity in an acidic environment. May be involved in inflammatory and metaplastic responses of the gastrointestinal epithelium (By similarity). {ECO:0000250}.	0	response to bacterium [GO:0009617]	heparin binding [GO:0008201]; mannan binding [GO:2001065]; signaling receptor activity [GO:0038023]	0
Klrc1	current symbol	MGI:1336161	Klrc1	killer cell lectin-like receptor subfamily C, member 1	protein coding gene	ENSMUSG00000030167	16641	A6H5Z4	0	0	CD8-positive, gamma-delta intraepithelial T cell differentiation [GO:0002305]; natural killer cell inhibitory signaling pathway [GO:0002769]; negative regulation of natural killer cell mediated cytotoxicity [GO:0045953]; negative regulation of T cell mediated cytotoxicity [GO:0001915]	HLA-E specific inhibitory MHC class Ib receptor activity [GO:0062082]; MHC class I protein complex binding [GO:0023024]	0
[truncated: 81 more rows]

## Sheet: Psychedelic_Mouse_NeuroGenes
Supplementary Table S4: Neuroregulatory DEGs in response to the treatment with psychedelic molecules
The gene list is manually compiled to create a prior-knowledge gene subset for extracting the fold change values. Only those datasets that have atleast one significant DEGs belonging to the neuroregulatory gene subset has been displayed in the matrix based on the filter criteria mentioned below
Filter Criteria
p-value <= 0.05; Fold change >=0.5 and <=-0.5
Note: Due to limited number of significant DEGs, filter criteria was relaxed to include genes based on p-value only and not the FDR value
[truncated: 501 more rows]

## Sheet: NeuroGene_Enrichment Analysis
Supplementary Table S5: The functional Enrichment analysis of neuro-regulatory DEGs generated from the UNIPROT and CPDB database (DEGs with 0.5 log fold change values).
[truncated: 589 more rows]

[truncated: 2 more sheets: Glycogene_FunctionAnalysis, NRM-Function Analysis]
